# Supplementary material
Source: PubMed Central journal article supplement (PMC3081016)
Supplement: 1018514108_sapp.pdf [file 1018514108_sapp.pdf]

## Supporting Information

**A.**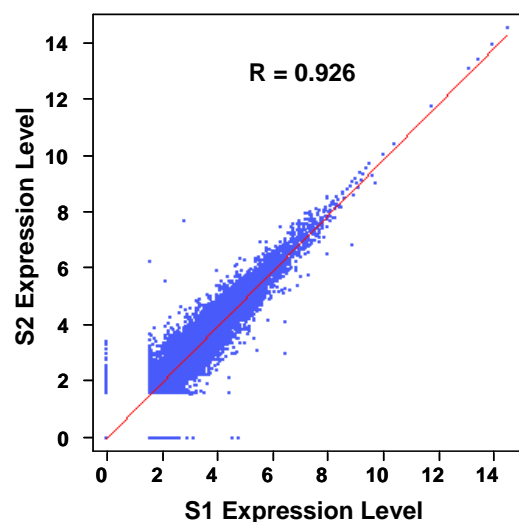**B.**

| Number of Genes | Expression Level (average reads) | Fraction of transcripts |
|-----------------|----------------------------------|-------------------------|
| 50              | 235-22476                        | 26.6%                   |
| 2000            | 23-235                           | 34.5%                   |
| 13958           | 1-23                             | 38.9%                   |

Figure S1. Genome-wide transcript levels in hippocampus detected by RNA-seq. (A). Correlation of all 16,008 detected transcripts between two individual (drug-free control) samples. (B). Signal distribution of all sequenced reads for all of the 16,008 expressed genes. The most highly expressed 50 genes account for 26.6% of all sequence reads. Vast majority of the genes (13,958) are expressed at relatively low level and account for 38.9% of the total signal.

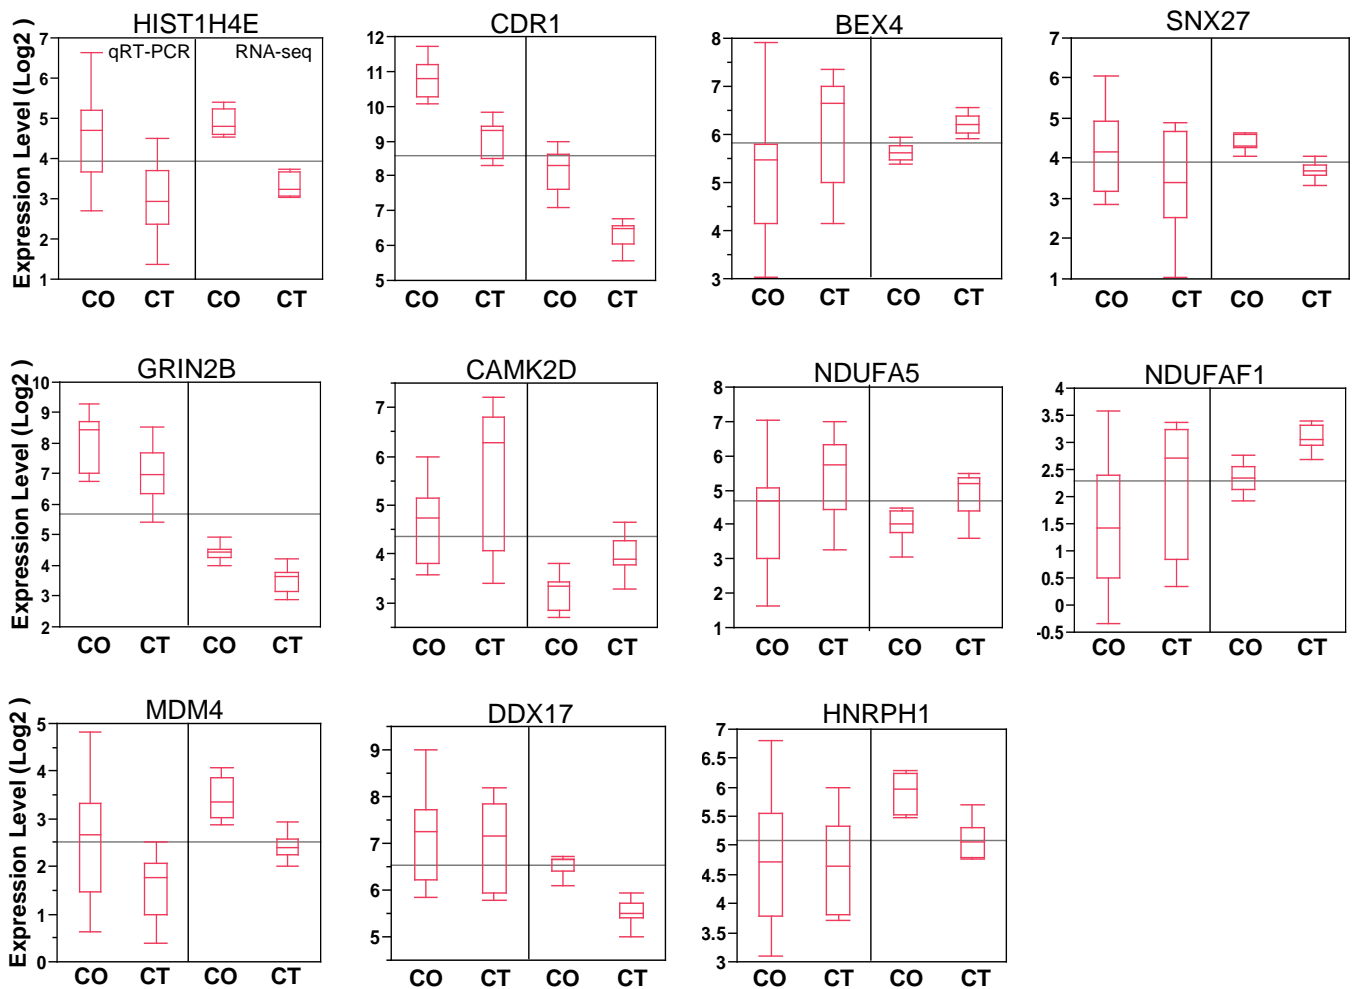

Figure S2. Box plots displaying expression changes of the 11 genes measured by both RNA-seq and quantitative RT-PCR. For both cocaine (CO) and control (CT) groups, the plots show the median, 75% percentile, minimum, and maximum expression levels measured by either qRT-PCR (left) and RNA-seq (right). Note that the expression levels are relative and not comparable between qRT-PCR and RNA-seq.

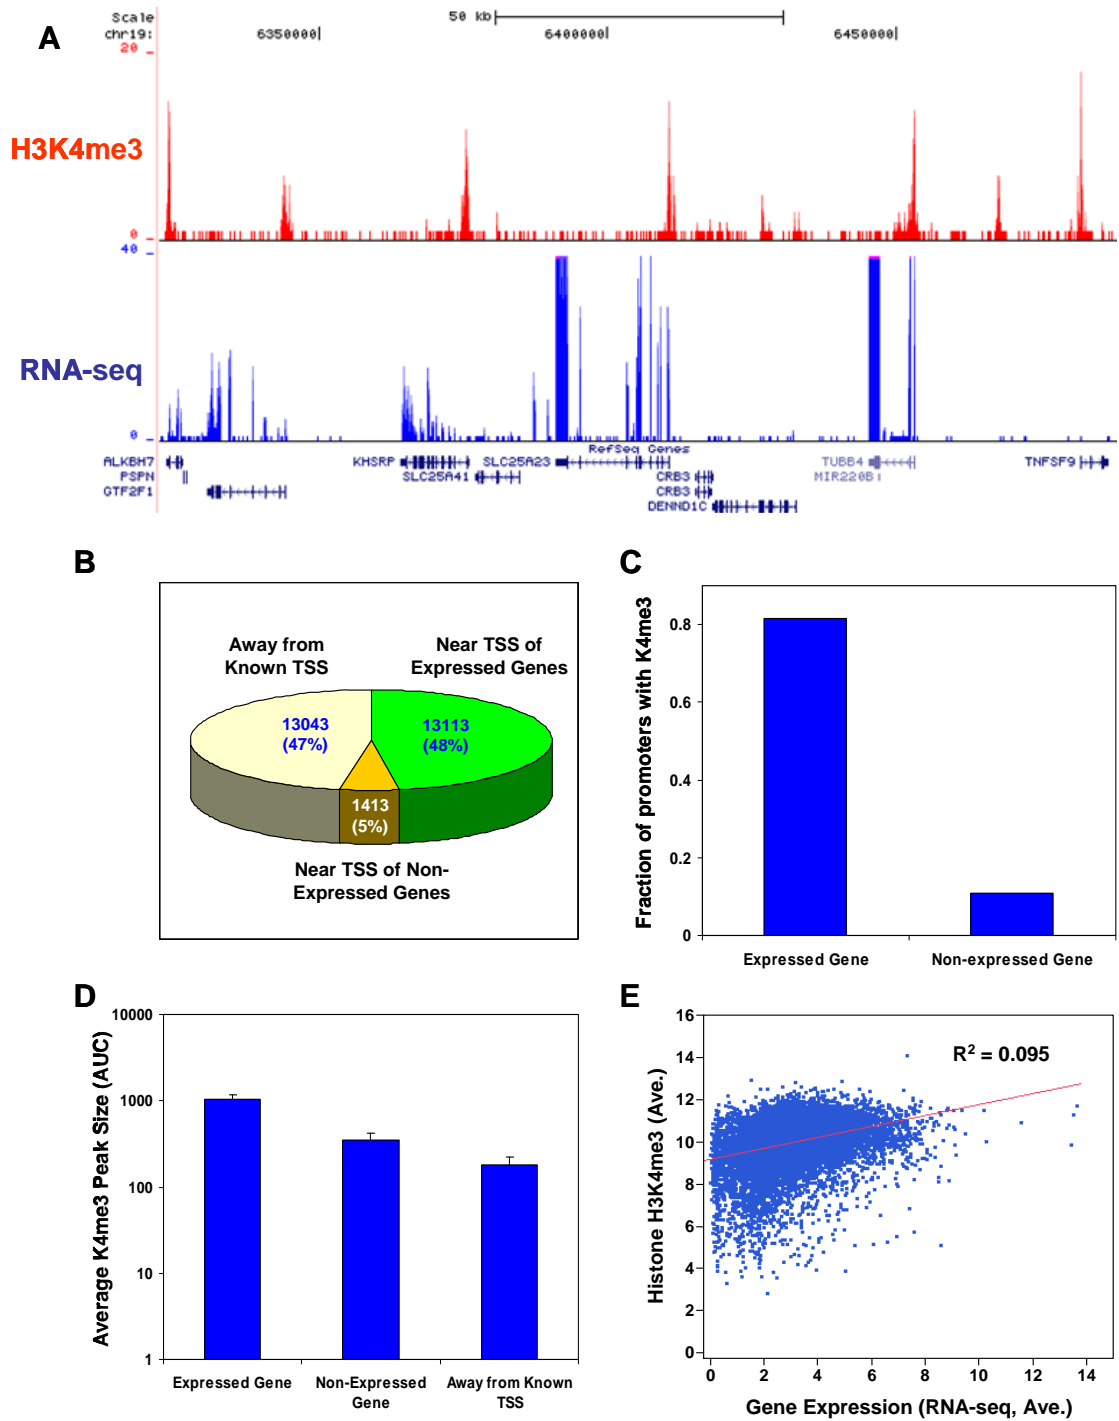

Figure S3. Genome-wide distribution of histone H3K4me3 signal and its correlation with gene expression. (A). Co-localization of histone H3K4me3 ChIP-seq reads with RNA-seq reads in a 150 kb region of chromosome 19. Histone H3K4me3 signals (upper track, red) are mapped to the promoter regions of the annotated genes where mRNA sequencing reads (lower track, blue) are also aligned with exonic regions of the expressed genes. Note the presence of H3K4me3 in some gene loci where expression was not detected. (B). Distribution of histone H3K4me3 peaks (27,569 in total genome-wide) in the

promoters of expressed genes (13,113 peaks, 48%), non-expressed genes (1413 peaks, 5%), and away from known transcription start site (13043 peaks, 47%). (C). Fractions of the promoters with histon H3K4Me3 in the expressed (82%) and non-expressed (11%) genes. (D). Average signal levels (peak sizes) of histone H3K4me3 in the expressed genes, non-expressed genes, and non-genic regions. (E). Global correlation of histone H3K4 me3 signal level with mRNA transcript level in 13,113 expressed genes in hippocampus.

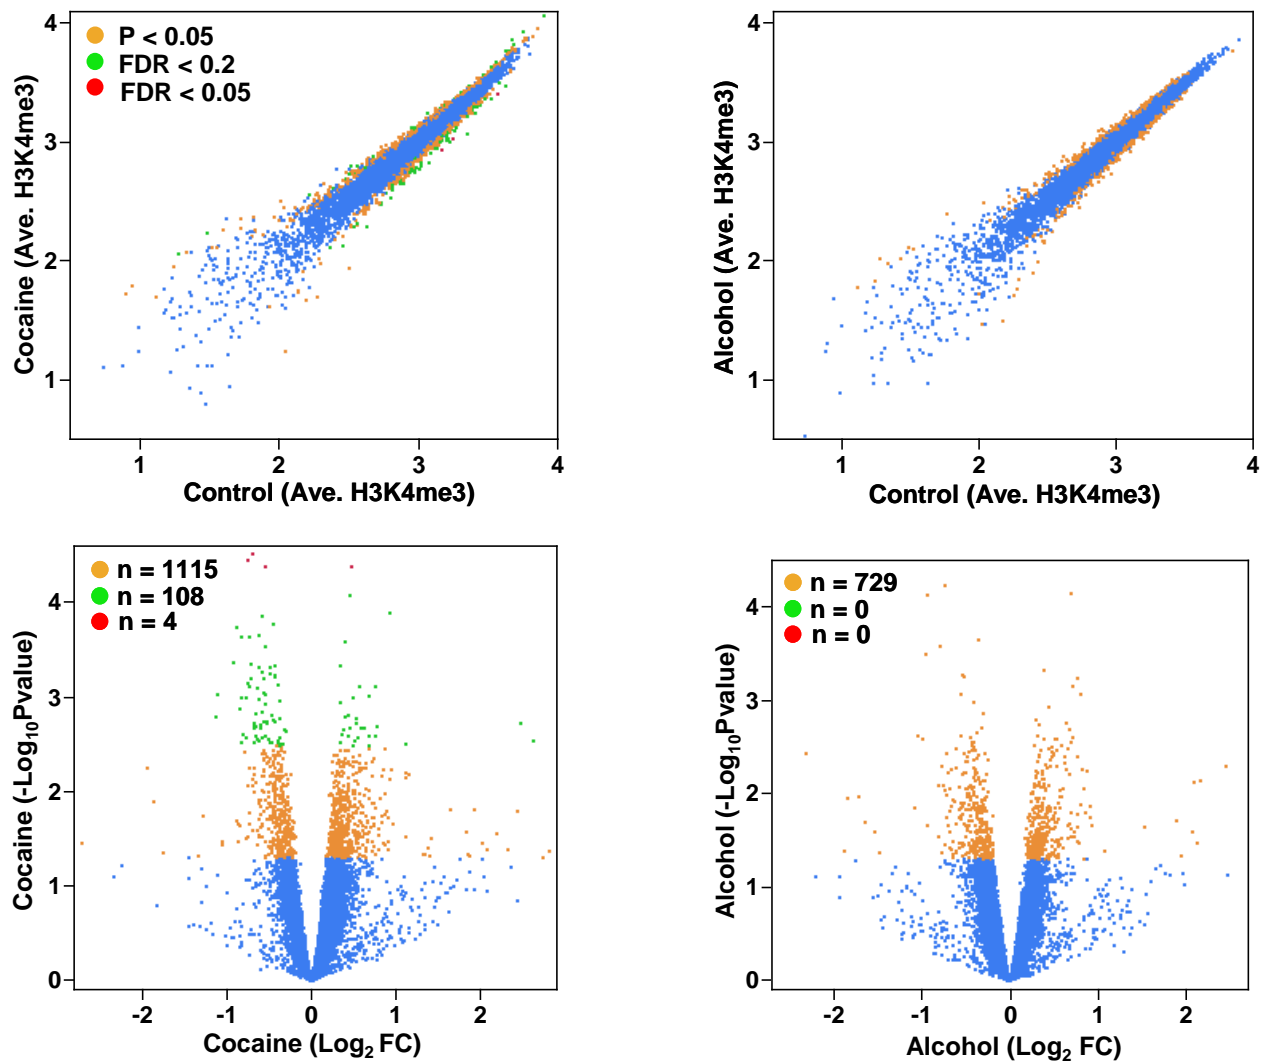

Figure S4. Profiles of histone H3K4me3 in the promoters of hippocampal expressed genes and their changes in chronically cocaine- or alcohol-addicted individuals. Upper panels display the scatter plots of the H3K4me3 levels in the promoters of 13,113 expressed genes in control vs. cocaine- (left) or alcohol-addicted (right) individuals. Lower panels provide the  $P$  values and alteration of the signal, in terms of fold-change, for all 13,113 genes in cocaine- (left) and alcohol- addicted (right) individuals. H3K4me3 peaks that are altered at different levels: uncorrected  $P < 0.05$ ,  $FDR < 0.2$ , or  $FDR < 0.05$  are indicated by the color coding.

Table S1. Study subject information

| Sample ID | Race <sup>1</sup> | Age | Gender | PMI <sup>2</sup> (h) | Phenotype     | Cause of Death                                 | Cocaine (Blood) (mg/L) | BE <sup>3</sup> (Blood) (mg/L) | Cocaine (Brain) (mg/kg) | BE (Brain) (mg/kg) | ETOH (Blood) (%) |
|-----------|-------------------|-----|--------|----------------------|---------------|------------------------------------------------|------------------------|--------------------------------|-------------------------|--------------------|------------------|
| CT1       | C                 | 43  | M      | 8                    | Control       | Atherosclerotic heart disease                  |                        |                                |                         |                    |                  |
| CT2       | C                 | 30  | M      | 16.8                 | Control       | Ventricular arrhythmia                         |                        |                                |                         |                    |                  |
| CT3       | C                 | 36  | M      | 22                   | Control       | Atherosclerotic cardiovascular disease         |                        |                                |                         |                    |                  |
| CT4       | B                 | 31  | M      | 22                   | Control       | Atherosclerotic and hypertensive heart disease |                        |                                |                         |                    |                  |
| CT5       | C                 | 50  | M      | 11                   | Control       | Acute myocardial infarction                    |                        |                                |                         |                    |                  |
| CT6       | C/H               | 41  | M      | 18.3                 | Control       | Myocardial infarct                             |                        |                                |                         |                    |                  |
| CT7       | B                 | 46  | M      | 16                   | Control       | Gunshot wound to chest                         |                        |                                |                         |                    |                  |
| CT8       | C/H               | 32  | M      | 18                   | Control       | Blunt force trauma                             |                        |                                |                         |                    |                  |
| CT9       | C/H               | 41  | M      | 16                   | Control       | Atherosclerotic heart disease                  |                        |                                |                         |                    |                  |
| CO1       | C/H               | 37  | M      | 19                   | Cocaine abuse | Acute cocaine toxicity                         | 6.0                    | 5.40                           | 3.1                     | 0.28               |                  |
| CO2       | C                 | 35  | M      | 20                   | Cocaine abuse | Cocaine intoxication                           | 14.8 *                 | NQ***                          | 2.3                     | 0.67               |                  |
| CO3       | B                 | 41  | M      | 18.5                 | Cocaine abuse | Cocaine toxicity                               | 0.56 **                | 2.0                            | 1.85                    | 0.84               |                  |
| CO4       | C                 | 32  | M      | 22                   | Cocaine abuse | Acute cocaine intoxication                     | 0.05                   | 1.30                           | 0.11                    | 0.58               |                  |
| CO5       | B                 | 38  | M      | 20                   | Cocaine abuse | Cocaine intoxication                           | 1.71                   | 12.5                           | 3.33                    | 5.7                |                  |
| CO6       | B                 | 45  | M      | 12                   | Cocaine abuse | Cocaine/ETOH intoxication                      | 0.33                   | 0.97                           | 0.27                    | 0.40               | 0.11             |
| CO7       | C/H               | 49  | M      | 19                   | Cocaine abuse | Acute cocaine intoxication                     | 0.01                   | 0.55                           | 0.13                    | 0.16               |                  |
| CO8       | C                 | 39  | M      |                      | Cocaine abuse | Cocaine intoxication                           | 0.51                   | 0.830                          | 0.13                    | 0.65               |                  |
| CO9       | C/H               | 35  | M      | 15                   | Cocaine abuse | Cocaine toxicity                               | 6.0                    | 5.40                           | 3.1                     | 0.28               |                  |
| ETOH 1    | C                 | 28  | M      | 22                   | Alcohol abuse | Occlusive coronary arteriosclerosis            |                        |                                |                         |                    | 0.01             |
| ETOH 2    | C                 | 33  | M      | 15                   | Alcohol abuse | Multiple blunt impact injuries                 |                        |                                |                         |                    | 0.02             |
| ETOH 3    | C/H               | 43  | M      | 16                   | Alcohol abuse | Complications of chronic ethanolism            |                        |                                |                         |                    | 0.15             |
| ETOH 4    | B                 | 48  | M      | 13                   | Alcohol abuse | Gunshot wound                                  |                        |                                |                         |                    | 0.02             |
| ETOH 5    | C                 | 25  | M      | 13.5                 | Alcohol abuse | Stab wound to chest/homicide                   |                        |                                |                         |                    | 0.18             |
| ETOH 6    | C/H               | 29  | M      | 12.25                | Alcohol abuse | Anoxic encephalopathy                          |                        |                                |                         |                    | 0.06             |
| ETOH 7    | C                 | 39  | M      |                      | Alcohol abuse | Ischemic heart disease                         |                        |                                |                         |                    | 0.05             |
| ETOH 8    | C/H               | 50  | M      | 19                   | Alcohol abuse | Ischemic heart disease                         |                        |                                |                         |                    | 0.01             |

<sup>1</sup> C: Caucasian, C/H: Caucasian/Hispanic, B: Black; <sup>2</sup> PMI: postmortem (death to freezing) interval; <sup>3</sup> Benzoyllecgonine

\* Postmortem heart blood; \*\* Aorta; \*\*\* NQ: not quantified

Table S2. Genes with significant differential expression (FDR < 0.2) observed in cocaine-addicted individuals

| <b>Gene Symbol</b> | <b>Gene Name</b>                                                                         | <b>Log FC</b> | <b>P value</b> | <b>FDR</b> |
|--------------------|------------------------------------------------------------------------------------------|---------------|----------------|------------|
| HIST1H4E           | Histone cluster 1, h4e                                                                   | 1.57          | 1.6E-10        | 0.000      |
| RN7SK              | RNA, 7SK small nuclear                                                                   | 2.42          | 5.3E-10        | 0.000      |
| CDR1               | Cerebellar degeneration-related protein 1, 34kda                                         | 1.81          | 5.2E-09        | 0.000      |
| DDX17              | DEAD (Asp-Glu-Ala-Asp) box polypeptide 17                                                | 1.02          | 1.4E-08        | 0.000      |
| SNORD89            | Small nucleolar RNA, C/D box 89                                                          | 1.53          | 5.6E-08        | 0.000      |
| SNORA73A           | Small nucleolar RNA, H/ACA box 73A                                                       | 1.41          | 2.2E-07        | 0.001      |
| MCCC1              | Methylcrotonoyl-Coenzyme A carboxylase 1 (alpha)                                         | -1.01         | 1.4E-06        | 0.003      |
| SCARNA17           | Small Cajal body-specific RNA 17                                                         | 1.30          | 1.6E-06        | 0.004      |
| AEBP2              | AE binding protein 2                                                                     | 0.90          | 2.8E-06        | 0.004      |
| MDM4               | Mdm4 p53 binding protein homolog (mouse)                                                 | 1.01          | 3.0E-06        | 0.004      |
| SNX27              | Sorting nexin family member 27                                                           | 0.68          | 3.8E-06        | 0.004      |
| RIN2               | Ras and Rab interactor 2                                                                 | 0.65          | 3.9E-06        | 0.004      |
| DPYSL2             | Dihydropyrimidinase-like 2                                                               | 0.93          | 3.9E-06        | 0.004      |
| PAPD1              | Mitochondrial poly(A) polymerase                                                         | 0.95          | 4.1E-06        | 0.004      |
| CACNB2             | Calcium channel, voltage-dependent, beta 2 subunit                                       | 0.87          | 4.8E-06        | 0.005      |
| IGF1R              | Insulin-like growth factor 1 receptor                                                    | 0.80          | 7.9E-06        | 0.008      |
| MRPS17             | Mitochondrial ribosomal protein S17                                                      | -0.80         | 8.5E-06        | 0.008      |
| LRCH4              | Leucine-rich repeats and calponin homology (CH) domain containing 4                      | 0.80          | 8.8E-06        | 0.008      |
| SNORD42A           | Small nucleolar RNA, C/D box 42A                                                         | -1.47         | 1.2E-05        | 0.010      |
| ZNF483             | Zinc finger protein 483                                                                  | 1.14          | 1.3E-05        | 0.010      |
| ZIM2               | Zinc finger, imprinted 2                                                                 | 1.13          | 1.4E-05        | 0.010      |
| SNORA47            | Small nucleolar RNA, H/ACA box 47                                                        | 1.82          | 1.5E-05        | 0.010      |
| IRGQ               | Immunity-related gtpase family, Q                                                        | 0.76          | 1.6E-05        | 0.011      |
| C3orf28            | Family with sequence similarity 162, member A                                            | -0.93         | 1.7E-05        | 0.011      |
| SCARNA5            | Small Cajal body-specific RNA 5                                                          | 1.50          | 2.0E-05        | 0.012      |
| LENG8              | Leukocyte receptor cluster (LRC) member 8                                                | 0.77          | 2.3E-05        | 0.014      |
| SNORA39            | Small nucleolar RNA, H/ACA box 39                                                        | 1.67          | 2.7E-05        | 0.015      |
| GRIN2B             | Glutamate receptor, ionotropic, N-methyl D-aspartate 2B                                  | 0.86          | 2.8E-05        | 0.015      |
| BEX4               | Brain expressed, X-linked 4                                                              | -0.58         | 2.8E-05        | 0.015      |
| FAM123A            | Family with sequence similarity 123A                                                     | 0.72          | 3.9E-05        | 0.019      |
| HIVEP3             | Human immunodeficiency virus type I enhancer binding protein 3                           | 0.70          | 3.9E-05        | 0.019      |
| GTF2A1             | General transcription factor IIA, 1, 19/37kda                                            | 0.74          | 4.7E-05        | 0.023      |
| KIAA0754           | Kiaa0754                                                                                 | 0.71          | 5.8E-05        | 0.026      |
| TXLNA              | Taxilin alpha                                                                            | 0.66          | 5.9E-05        | 0.026      |
| ILF2               | Interleukin enhancer binding factor 2, 45kda                                             | -0.65         | 6.0E-05        | 0.026      |
| LILRB1             | Leukocyte immunoglobulin-like receptor, subfamily B (with TM and ITIM domains), member 1 | -1.15         | 6.0E-05        | 0.026      |
| C4orf12            | Chromosome 4 open reading frame 12                                                       | 0.78          | 6.3E-05        | 0.026      |



|           |                                                                                |       |         |       |
|-----------|--------------------------------------------------------------------------------|-------|---------|-------|
| HNRPH1    | Heterogeneous nuclear ribonucleoprotein H1                                     | 0.81  | 6.5E-05 | 0.026 |
| RAP2B     | RAP2B, member of RAS oncogene family                                           | 0.98  | 6.6E-05 | 0.026 |
| NDUFAF1   | NADH dehydrogenase (ubiquinone) 1 alpha subcomplex, assembly factor 1          | -0.73 | 7.9E-05 | 0.030 |
| CD36      | CD36 molecule (thrombospondin receptor)                                        | -1.43 | 8.3E-05 | 0.031 |
| PPCS      | Phosphopantothencysteine synthetase                                            | -0.80 | 9.0E-05 | 0.033 |
| ZGPAT     | Zinc finger, CCCH-type with G patch domain                                     | 0.55  | 9.2E-05 | 0.033 |
| SLC8A1    | Solute carrier family 8 (sodium/calcium exchanger), member 1                   | 0.93  | 9.8E-05 | 0.033 |
| C20orf112 | Chromosome 20 open reading frame 112                                           | 0.82  | 9.8E-05 | 0.033 |
| LENG9     | Leukocyte receptor cluster (LRC) member 9                                      | 0.73  | 1.1E-04 | 0.035 |
| STIM2     | Stromal interaction molecule 2                                                 | 0.75  | 1.1E-04 | 0.035 |
| KLHL12    | Kelch-like 12 (Drosophila)                                                     | -0.75 | 1.1E-04 | 0.035 |
| BEX1      | Brain expressed, X-linked 1                                                    | -0.66 | 1.1E-04 | 0.035 |
| UQCRH     | Ubiquinol-cytochrome c reductase hinge protein                                 | -0.74 | 1.1E-04 | 0.035 |
| PBXIP1    | Pre-B-cell leukemia homeobox interacting protein 1                             | 0.91  | 1.2E-04 | 0.035 |
| SNORA74B  | Small nucleolar RNA, H/ACA box 74B                                             | 1.60  | 1.2E-04 | 0.035 |
| SLC24A4   | Solute carrier family 24 (sodium/potassium/calcium exchanger), member 4        | 0.89  | 1.2E-04 | 0.035 |
| IGSF9B    | Immunoglobulin superfamily, member 9B                                          | 1.05  | 1.3E-04 | 0.037 |
| SNORA62   | Small nucleolar RNA, H/ACA box 62                                              | 1.87  | 1.3E-04 | 0.038 |
| FLJ23556  | Flj23556                                                                       | 1.40  | 1.4E-04 | 0.038 |
| MTA2      | Metastasis associated 1 family, member 2                                       | 0.78  | 1.4E-04 | 0.038 |
| SNORD76   | Small nucleolar RNA, C/D box 76                                                | 1.21  | 1.6E-04 | 0.042 |
| ELK4      | ELK4, ETS-domain protein (SRF accessory protein 1)                             | 0.60  | 1.7E-04 | 0.042 |
| SCARNA7   | Small Cajal body-specific RNA 7                                                | 1.53  | 1.7E-04 | 0.042 |
| RNF41     | Ring finger protein 41                                                         | -0.61 | 1.7E-04 | 0.042 |
| PPP3CA    | Protein phosphatase 3 (formerly 2B), catalytic subunit, alpha isoform          | 0.91  | 1.8E-04 | 0.042 |
| HIST1H4H  | Histone cluster 1, h4h                                                         | 1.03  | 1.8E-04 | 0.042 |
| LRRTM4    | Leucine rich repeat transmembrane neuronal 4                                   | 0.77  | 1.8E-04 | 0.042 |
| MGC22014  | Tet oncogene family member 3p                                                  | 0.82  | 1.8E-04 | 0.042 |
| SNORD33   | Small nucleolar RNA, C/D box 33                                                | 0.74  | 1.8E-04 | 0.042 |
| RNF187    | Ring finger protein 187                                                        | -0.60 | 1.9E-04 | 0.042 |
| ZBTB44    | Zinc finger and BTB domain containing 44                                       | 0.61  | 1.9E-04 | 0.043 |
| LRCH3     | Leucine-rich repeats and calponin homology (CH) domain containing 3            | 0.76  | 2.0E-04 | 0.043 |
| SLC25A14  | Solute carrier family 25 (mitochondrial carrier, brain), member 14             | -0.78 | 2.0E-04 | 0.043 |
| SNORD74   | Small nucleolar RNA, C/D box 74                                                | 1.37  | 2.1E-04 | 0.044 |
| IFITM1    | Interferon induced transmembrane protein 1 (9-27)                              | 1.36  | 2.1E-04 | 0.044 |
| ERF       | Ets2 repressor factor                                                          | 0.65  | 2.2E-04 | 0.046 |
| MRPL27    | Mitochondrial ribosomal protein L27                                            | -0.50 | 2.2E-04 | 0.046 |
| ATP5O     | ATP synthase, H <sup>+</sup> transporting, mitochondrial F1 complex, O subunit | -0.61 | 2.3E-04 | 0.046 |
| SIRPB1    | Signal-regulatory protein beta 1                                               | -1.60 | 2.3E-04 | 0.046 |

|          |                                                                           |       |         |       |
|----------|---------------------------------------------------------------------------|-------|---------|-------|
| CAMK2D   | Calcium/calmodulin-dependent protein kinase II delta                      | -0.72 | 2.3E-04 | 0.047 |
| MRPS28   | Mitochondrial ribosomal protein S28                                       | -0.78 | 2.4E-04 | 0.049 |
| RPSA     | Ribosomal protein SA                                                      | 1.56  | 2.5E-04 | 0.050 |
| DNAJC19  | Dnaj (Hsp40) homolog, subfamily C, member 19                              | -0.74 | 2.5E-04 | 0.050 |
| BMF      | Bcl2 modifying factor                                                     | -1.26 | 2.7E-04 | 0.051 |
| MAMDC4   | MAM domain containing 4                                                   | 0.59  | 2.8E-04 | 0.053 |
| FMN2     | Formin 2                                                                  | 0.54  | 2.8E-04 | 0.053 |
| HINT1    | Histidine triad nucleotide binding protein 1                              | -0.75 | 2.9E-04 | 0.053 |
| MAD2L1   | MAD2 mitotic arrest deficient-like 1 (yeast)                              | -1.27 | 2.9E-04 | 0.053 |
| HMSD     | Histocompatibility (minor) serpin domain containing                       | -1.06 | 2.9E-04 | 0.053 |
| COL4A3BP | Collagen, type IV, alpha 3 (Goodpasture antigen) binding protein          | 0.83  | 2.9E-04 | 0.053 |
| HNRNPU   | Heterogeneous nuclear ribonucleoprotein U (scaffold attachment factor A)  | 0.70  | 2.9E-04 | 0.053 |
| SNORD116 | Small nucleolar RNA, C/D box 116-29                                       | -1.68 | 3.0E-04 | 0.053 |
| -29      |                                                                           |       |         |       |
| MCM6     | Minichromosome maintenance complex component 6                            | -0.58 | 3.0E-04 | 0.053 |
| PSMG1    | Proteasome (prosome, macropain) assembly chaperone 1                      | -0.74 | 3.1E-04 | 0.054 |
| NDUFA5   | NADH dehydrogenase (ubiquinone) 1 alpha subcomplex, 5, 13kda              | -0.91 | 3.1E-04 | 0.054 |
| CCDC104  | Coiled-coil domain containing 104                                         | -0.72 | 3.1E-04 | 0.054 |
| ALS2CR4  | Amyotrophic lateral sclerosis 2 (juvenile) chromosome region, candidate 4 | -0.60 | 3.5E-04 | 0.059 |
| SELT     | Selenoprotein T                                                           | -0.81 | 3.6E-04 | 0.059 |
| ZBTB7B   | Zinc finger and BTB domain containing 7B                                  | 0.58  | 3.6E-04 | 0.059 |
| MRPL15   | Mitochondrial ribosomal protein L15                                       | -0.60 | 3.6E-04 | 0.060 |
| C9orf119 | Chromosome 9 open reading frame 119                                       | -0.61 | 3.8E-04 | 0.061 |
| GSTA4    | Glutathione S-transferase alpha 4                                         | -0.64 | 3.8E-04 | 0.062 |
| TMEM168  | Transmembrane protein 168                                                 | -0.67 | 4.2E-04 | 0.067 |
| ARID5B   | AT rich interactive domain 5B (MRF1-like)                                 | 0.72  | 4.2E-04 | 0.067 |
| MUPCDH   | Mucin-like protocadherin                                                  | 0.83  | 4.3E-04 | 0.067 |
| C9orf139 | Chromosome 9 open reading frame 139                                       | 0.90  | 4.4E-04 | 0.068 |
| PLDN     | Pallidin homolog (mouse)                                                  | -0.85 | 4.5E-04 | 0.069 |
| SUMO1P3  | SUMO1 pseudogene 3                                                        | -0.84 | 4.6E-04 | 0.069 |
| PRPSAP2  | Phosphoribosyl pyrophosphate synthetase-associated protein 2              | -0.67 | 4.7E-04 | 0.070 |
| MYO19    | Myosin XIX                                                                | -0.79 | 4.8E-04 | 0.070 |
| TMEM14B  | Transmembrane protein 14B                                                 | -0.79 | 4.9E-04 | 0.072 |
| PPP1R1B  | Protein phosphatase 1, regulatory (inhibitor) subunit 1B                  | 0.75  | 5.0E-04 | 0.073 |
| PHACTR1  | Phosphatase and actin regulator 1                                         | 0.73  | 5.4E-04 | 0.077 |
| ZMAT2    | Zinc finger, matrin type 2                                                | -0.55 | 5.7E-04 | 0.080 |
| TRO      | Trophinin                                                                 | -0.49 | 5.9E-04 | 0.081 |
| ARV1     | ARV1 homolog ( <i>S. Cerevisiae</i> )                                     | -0.63 | 5.9E-04 | 0.081 |
| LMTK2    | Lemur tyrosine kinase 2                                                   | 0.61  | 5.9E-04 | 0.081 |

|          |                                                                     |       |         |       |
|----------|---------------------------------------------------------------------|-------|---------|-------|
| OTUD7A   | OTU domain containing 7A                                            | 0.58  | 6.0E-04 | 0.081 |
| SNORD22  | Small nucleolar RNA, C/D box 22                                     | 1.17  | 6.1E-04 | 0.081 |
| SYNPO2   | Synaptopodin 2                                                      | 0.61  | 6.1E-04 | 0.081 |
| CDS2     | CDP-diacylglycerol synthase (phosphatidate cytidyltransferase) 2    | 0.59  | 6.2E-04 | 0.081 |
| C9orf3   | Chromosome 9 open reading frame 3                                   | 0.70  | 6.5E-04 | 0.084 |
| TSC22D2  | TSC22 domain family, member 2                                       | 0.62  | 6.6E-04 | 0.085 |
| XKR4     | XK, Kell blood group complex subunit-related family, member 4       | 0.51  | 6.9E-04 | 0.088 |
| THYN1    | Thymocyte nuclear protein 1                                         | -0.64 | 7.0E-04 | 0.088 |
| HMBOX1   | Homeobox containing 1                                               | 0.72  | 7.2E-04 | 0.090 |
| TMSB4Y   | Thymosin beta 4, Y-linked                                           | -0.56 | 7.3E-04 | 0.090 |
| AP3M2    | Adaptor-related protein complex 3, mu 2 subunit                     | -0.70 | 7.3E-04 | 0.090 |
| TMEM14A  | Transmembrane protein 14A                                           | -0.74 | 7.3E-04 | 0.090 |
| PLXDC2   | Plexin domain containing 2                                          | 0.66  | 7.3E-04 | 0.090 |
| HSPG2    | Heparan sulfate proteoglycan 2                                      | 0.67  | 7.5E-04 | 0.091 |
| HDAC2    | Histone deacetylase 2                                               | -0.75 | 7.7E-04 | 0.094 |
| NF2      | Neurofibromin 2 (merlin)                                            | 0.74  | 7.8E-04 | 0.094 |
| RANBP17  | RAN binding protein 17                                              | -1.36 | 8.2E-04 | 0.098 |
| PCYOX1L  | Prenylcysteine oxidase 1 like                                       | -0.68 | 8.3E-04 | 0.098 |
| TARS2    | Threonyl-trna synthetase 2, mitochondrial (putative)                | -0.53 | 8.4E-04 | 0.098 |
| STX1B    | Syntaxin 1B                                                         | 0.69  | 8.4E-04 | 0.098 |
| NUFIP2   | Nuclear fragile X mental retardation protein interacting protein 2  | 0.72  | 8.5E-04 | 0.099 |
| MICALL2  | MICAL-like 2                                                        | 0.55  | 8.8E-04 | 0.100 |
| SLA2     | Src-like-adaptor 2                                                  | 1.25  | 9.0E-04 | 0.101 |
| POLR2G   | Polymerase (RNA) II (DNA directed) polypeptide G                    | -0.65 | 9.0E-04 | 0.101 |
| POLR1D   | Polymerase (RNA) I polypeptide D, 16kda                             | -0.68 | 9.1E-04 | 0.102 |
| TNKS1BP1 | Tankyrase 1 binding protein 1, 182kda                               | 0.60  | 9.4E-04 | 0.102 |
| PROK1    | Prokineticin 1                                                      | 0.79  | 9.4E-04 | 0.102 |
| H2AFZ    | H2A histone family, member Z                                        | -0.62 | 9.5E-04 | 0.102 |
| QSER1    | Glutamine and serine rich 1                                         | 0.64  | 9.9E-04 | 0.103 |
| SDHA     | Succinate dehydrogenase complex, subunit A, flavoprotein (Fp)       | -0.49 | 9.9E-04 | 0.103 |
| RAB6A    | RAB6A, member RAS oncogene family                                   | -0.79 | 1.0E-03 | 0.103 |
| LRP1B    | Low density lipoprotein-related protein 1B (deleted in tumors)      | 0.52  | 1.0E-03 | 0.104 |
| SFRS6    | Splicing factor, arginine/serine-rich 6                             | 0.67  | 1.0E-03 | 0.104 |
| HYLS1    | Hydrolethalus syndrome 1                                            | -0.77 | 1.0E-03 | 0.106 |
| MTCH2    | Mitochondrial carrier homolog 2 (C. Elegans)                        | -0.50 | 1.0E-03 | 0.106 |
| PPP1CB   | Protein phosphatase 1, catalytic subunit, beta isoform              | 0.75  | 1.1E-03 | 0.106 |
| ZDHHC11B | Zinc finger, DHHC-type containing 11B                               | 1.00  | 1.1E-03 | 0.106 |
| OLFML3   | Olfactomedin-like 3                                                 | -0.69 | 1.1E-03 | 0.106 |
| KCNA2    | Potassium voltage-gated channel, shaker-related subfamily, member 2 | 0.67  | 1.1E-03 | 0.106 |

|          |                                                                                     |       |         |       |
|----------|-------------------------------------------------------------------------------------|-------|---------|-------|
| NDUFAB1  | NADH dehydrogenase (ubiquinone) 1, alpha/beta subcomplex, 1, 8kda                   | -0.86 | 1.1E-03 | 0.106 |
| P2RX5    | Purinergic receptor P2X, ligand-gated ion channel, 5                                | -0.73 | 1.1E-03 | 0.106 |
| TM2D3    | TM2 domain containing 3                                                             | -0.62 | 1.1E-03 | 0.106 |
| TNIK     | TRAF2 and NCK interacting kinase                                                    | 0.58  | 1.1E-03 | 0.106 |
| AFF1     | AF4/FMR2 family, member 1                                                           | 0.47  | 1.1E-03 | 0.106 |
| IGF2     | Insulin-like growth factor 2 (somatomedin A)                                        | 1.30  | 1.1E-03 | 0.106 |
| MAPK7    | Mitogen-activated protein kinase 7                                                  | 0.54  | 1.1E-03 | 0.107 |
| ACRV1    | Acrosomal vesicle protein 1                                                         | -1.19 | 1.1E-03 | 0.107 |
| TFR2     | Transferrin receptor 2                                                              | -0.65 | 1.1E-03 | 0.107 |
| ARHGAP17 | Rho gtpase activating protein 17                                                    | 0.58  | 1.2E-03 | 0.108 |
| DCXR     | Dicarbonyl/L-xylulose reductase                                                     | 0.53  | 1.2E-03 | 0.108 |
| PRICKLE2 | Prickle homolog 2 (Drosophila)                                                      | 0.84  | 1.2E-03 | 0.108 |
| CTDSP2   | CTD (carboxy-terminal domain, RNA polymerase II, polypeptide A) small phosphatase 2 | 0.49  | 1.2E-03 | 0.109 |
| SCARNA6  | Small Cajal body-specific RNA 6                                                     | 1.03  | 1.2E-03 | 0.110 |
| C7orf46  | Chromosome 7 open reading frame 46                                                  | -0.62 | 1.2E-03 | 0.110 |
| ZNF165   | Zinc finger protein 165                                                             | -0.99 | 1.2E-03 | 0.114 |
| ZSCAN5   | Zinc finger and SCAN domain containing 5A                                           | -0.62 | 1.3E-03 | 0.115 |
| SHPRH    | SNF2 histone linker PHD RING helicase                                               | 0.49  | 1.3E-03 | 0.115 |
| TARBP1   | TAR (HIV-1) RNA binding protein 1                                                   | -0.70 | 1.3E-03 | 0.115 |
| GYS2     | Glycogen synthase 2 (liver)                                                         | 1.00  | 1.3E-03 | 0.118 |
| DHX34    | DEAH (Asp-Glu-Ala-His) box polypeptide 34                                           | 0.53  | 1.4E-03 | 0.121 |
| ZBTB16   | Zinc finger and BTB domain containing 16                                            | 0.57  | 1.4E-03 | 0.121 |
| TTY15    | Testis-specific transcript, Y-linked 15 (non-protein coding)                        | 0.68  | 1.4E-03 | 0.122 |
| RMRP     | RNA component of mitochondrial RNA processing endoribonuclease                      | 0.82  | 1.4E-03 | 0.122 |
| SIAE     | Sialic acid acetyltransferase                                                       | -0.51 | 1.4E-03 | 0.123 |
| SCNN1A   | Sodium channel, nonvoltage-gated 1 alpha                                            | 1.73  | 1.4E-03 | 0.123 |
| EXOC6B   | Exocyst complex component 6B                                                        | 0.51  | 1.4E-03 | 0.124 |
| PPP1R3B  | Protein phosphatase 1, regulatory (inhibitor) subunit 3B                            | 0.62  | 1.4E-03 | 0.124 |
| C10orf93 | Chromosome 10 open reading frame 93                                                 | 0.82  | 1.5E-03 | 0.125 |
| C1orf215 | Chromosome 1 open reading frame 215                                                 | -1.03 | 1.5E-03 | 0.125 |
| SLC41A3  | Solute carrier family 41, member 3                                                  | -0.59 | 1.5E-03 | 0.126 |
| HPS6     | Hermansky-Pudlak syndrome 6                                                         | -0.63 | 1.6E-03 | 0.131 |
| MDM2     | Mdm2 p53 binding protein homolog (mouse)                                            | 0.51  | 1.6E-03 | 0.132 |
| COPS4    | COP9 constitutive photomorphogenic homolog subunit 4 (Arabidopsis)                  | -0.66 | 1.6E-03 | 0.133 |
| SNORD4A  | Small nucleolar RNA, C/D box 4A                                                     | -1.31 | 1.6E-03 | 0.133 |
| PSMC2    | Proteasome (prosome, macropain) 26S subunit, atpase, 2                              | -0.55 | 1.7E-03 | 0.136 |
| MSH1     | Musashi homolog 1 (Drosophila)                                                      | 0.60  | 1.7E-03 | 0.137 |
| MRPL45   | Mitochondrial ribosomal protein L45                                                 | -0.72 | 1.7E-03 | 0.137 |
| KIAA1199 | Kiaa1199                                                                            | 0.70  | 1.7E-03 | 0.137 |

|          |                                                                                                     |       |         |       |
|----------|-----------------------------------------------------------------------------------------------------|-------|---------|-------|
| PTPRD    | Protein tyrosine phosphatase, receptor type, D                                                      | -0.68 | 1.7E-03 | 0.137 |
| C6orf98  | Chromosome 6 open reading frame 98                                                                  | -1.07 | 1.7E-03 | 0.138 |
| LAMA5    | Laminin, alpha 5                                                                                    | 0.54  | 1.7E-03 | 0.138 |
| RNASEN   | Ribonuclease type III, nuclear                                                                      | -0.57 | 1.7E-03 | 0.138 |
| C9orf105 | Chromosome 9 open reading frame 105                                                                 | -0.65 | 1.7E-03 | 0.138 |
| CENTB5   | Arfgap with coiled-coil, ankyrin repeat and PH domains 3                                            | 0.54  | 1.8E-03 | 0.139 |
| GRP      | Gastrin-releasing peptide                                                                           | -0.72 | 1.8E-03 | 0.139 |
| LPHN1    | Latrophilin 1                                                                                       | 0.72  | 1.8E-03 | 0.139 |
| TAOK2    | TAO kinase 2                                                                                        | 0.56  | 1.8E-03 | 0.139 |
| LEF1     | Lymphoid enhancer-binding factor 1                                                                  | 0.69  | 1.8E-03 | 0.139 |
| ZNF518A  | Zinc finger protein 518A                                                                            | 0.53  | 1.8E-03 | 0.139 |
| ARIH1    | Ariadne homolog, ubiquitin-conjugating enzyme E2 binding protein, 1 (Drosophila)                    | 0.66  | 1.8E-03 | 0.139 |
| ZDHHC4   | Zinc finger, DHHC-type containing 4                                                                 | -0.67 | 1.8E-03 | 0.139 |
| IRF3     | Interferon regulatory factor 3                                                                      | 0.64  | 1.8E-03 | 0.140 |
| UBE2V2   | Ubiquitin-conjugating enzyme E2 variant 2                                                           | -0.77 | 1.9E-03 | 0.140 |
| EVI5     | Ecotropic viral integration site 5                                                                  | 0.64  | 1.9E-03 | 0.143 |
| HERC1    | Hect (homologous to the E6-AP (UBE3A) carboxyl terminus) domain and RCC1 (CHC1)-like domain (RLD) 1 | 0.44  | 1.9E-03 | 0.143 |
| CHST3    | Carbohydrate (chondroitin 6) sulfotransferase 3                                                     | 0.51  | 1.9E-03 | 0.143 |
| NRP1     | Neuropilin 1                                                                                        | 0.75  | 2.0E-03 | 0.145 |
| TMEM14C  | Transmembrane protein 14C                                                                           | -0.62 | 2.0E-03 | 0.145 |
| XYLT2    | Xylosyltransferase II                                                                               | 0.63  | 2.0E-03 | 0.146 |
| STX12    | Syntaxin 12                                                                                         | -0.50 | 2.0E-03 | 0.146 |
| NFIA     | Nuclear factor I/A                                                                                  | 0.72  | 2.0E-03 | 0.146 |
| MLLT6    | Myeloid/lymphoid or mixed-lineage leukemia (trithorax homolog, Drosophila); translocated to, 6      | 0.48  | 2.0E-03 | 0.146 |
| GAS5     | Growth arrest-specific 5 (non-protein coding)                                                       | 1.01  | 2.0E-03 | 0.146 |
| RNF8     | Ring finger protein 8                                                                               | -0.43 | 2.0E-03 | 0.146 |
| TAF4B    | TAF4b RNA polymerase II, TATA box binding protein (TBP)-associated factor, 105kda                   | -0.72 | 2.0E-03 | 0.146 |
| KLHL1    | Kelch-like 1 (Drosophila)                                                                           | -1.06 | 2.1E-03 | 0.147 |
| HEATR1   | HEAT repeat containing 1                                                                            | -0.39 | 2.1E-03 | 0.147 |
| TIMP2    | TIMP metalloproteinase inhibitor 2                                                                  | -0.63 | 2.1E-03 | 0.147 |
| LGALS8   | Lectin, galactoside-binding, soluble, 8                                                             | -0.39 | 2.1E-03 | 0.147 |
| ABCG4    | ATP-binding cassette, sub-family G (WHITE), member 4                                                | -0.54 | 2.1E-03 | 0.149 |
| HIST1H4C | Histone cluster 1, h4c                                                                              | 0.70  | 2.2E-03 | 0.152 |
| FRG1B    | FSHD region gene 1 family, member B                                                                 | -0.57 | 2.2E-03 | 0.153 |
| TLE3     | Transducin-like enhancer of split 3 (E(sp1) homolog, Drosophila)                                    | 0.52  | 2.2E-03 | 0.153 |
| SLC25A5  | Solute carrier family 25 (mitochondrial carrier; adenine nucleotide translocator), member 5         | -0.69 | 2.2E-03 | 0.153 |
| NPM3     | Nucleophosmin/nucleoplasmin 3                                                                       | -0.97 | 2.3E-03 | 0.153 |

|          |                                                            |       |         |       |
|----------|------------------------------------------------------------|-------|---------|-------|
| VISA     | Mitochondrial antiviral signaling protein                  | 0.44  | 2.3E-03 | 0.153 |
| L3MBTL   | L(3)mbt-like (Drosophila)                                  | 0.46  | 2.3E-03 | 0.153 |
| WDR42C   | DDB1 and CUL4 associated factor 8-like 2                   | -1.36 | 2.3E-03 | 0.154 |
| DIPAS    | PAPPA antisense RNA                                        | 1.21  | 2.3E-03 | 0.154 |
| GPR75    | G protein-coupled receptor 75                              | 0.52  | 2.3E-03 | 0.154 |
| ATF7IP   | Activating transcription factor 7 interacting protein      | 0.47  | 2.3E-03 | 0.154 |
| IFITM3   | Interferon induced transmembrane protein 3 (1-8U)          | 1.16  | 2.4E-03 | 0.156 |
| IQCH     | IQ motif containing H                                      | -1.11 | 2.4E-03 | 0.159 |
| KIAA1305 | NYN domain and retroviral integrase containing             | 0.44  | 2.5E-03 | 0.162 |
| ZBTB20   | Zinc finger and BTB domain containing 20                   | 0.85  | 2.5E-03 | 0.162 |
| FLJ21438 | RAS protein activator like 3                               | -0.88 | 2.5E-03 | 0.162 |
| ZNF469   | Zinc finger protein 469                                    | 0.45  | 2.5E-03 | 0.162 |
| LETMD1   | LETM1 domain containing 1                                  | -0.55 | 2.5E-03 | 0.162 |
| PACRG    | PARK2 co-regulated                                         | -0.85 | 2.5E-03 | 0.163 |
| ZMAT3    | Zinc finger, matrin type 3                                 | 0.62  | 2.6E-03 | 0.163 |
| CPO      | Carboxypeptidase O                                         | -1.11 | 2.6E-03 | 0.163 |
| C11orf38 | Prostate and testis expressed 2                            | -1.05 | 2.6E-03 | 0.163 |
| ATP7B    | Atpase, Cu <sup>++</sup> transporting, beta polypeptide    | 0.43  | 2.6E-03 | 0.163 |
| GPR132   | G protein-coupled receptor 132                             | -1.06 | 2.6E-03 | 0.163 |
| CRHBP    | Corticotropin releasing hormone binding protein            | -0.74 | 2.6E-03 | 0.163 |
| PRR19    | Proline rich 19                                            | -1.04 | 2.6E-03 | 0.163 |
| SBNO2    | Strawberry notch homolog 2 (Drosophila)                    | 0.66  | 2.7E-03 | 0.166 |
| GTF2F2   | General transcription factor IIF, polypeptide 2, 30kda     | -0.52 | 2.7E-03 | 0.166 |
| NDRG3    | NDRG family member 3                                       | -0.67 | 2.7E-03 | 0.167 |
| BMP4     | Bone morphogenetic protein 4                               | 1.22  | 2.7E-03 | 0.168 |
| TNRC6C   | Trinucleotide repeat containing 6C                         | 0.59  | 2.8E-03 | 0.170 |
| SPATS2   | Spermatogenesis associated, serine-rich 2                  | 0.41  | 2.8E-03 | 0.171 |
| DNMT3A   | DNA (cytosine-5-)-methyltransferase 3 alpha                | 0.73  | 2.8E-03 | 0.171 |
| GAD1     | Glutamate decarboxylase 1 (brain, 67kda)                   | -0.78 | 2.8E-03 | 0.171 |
| PHF16    | PHD finger protein 16                                      | -0.45 | 2.9E-03 | 0.172 |
| ECOP     | EGFR-coamplified and overexpressed protein                 | -0.42 | 2.9E-03 | 0.172 |
| KLF13    | Kruppel-like factor 13                                     | 0.40  | 2.9E-03 | 0.172 |
| CCNDBP1  | Cyclin D-type binding-protein 1                            | -0.60 | 2.9E-03 | 0.173 |
| ADAMTS4  | ADAM metalloproteinase with thrombospondin type 1 motif, 4 | 0.65  | 2.9E-03 | 0.173 |
| SFT2D2   | SFT2 domain containing 2                                   | 0.81  | 2.9E-03 | 0.173 |
| AS3MT    | Arsenic (+3 oxidation state) methyltransferase             | -0.50 | 2.9E-03 | 0.173 |
| TXN      | Thioredoxin                                                | -0.65 | 3.0E-03 | 0.173 |
| RFXAP    | Regulatory factor X-associated protein                     | 0.62  | 3.0E-03 | 0.173 |
| CCDC115  | Coiled-coil domain containing 115                          | -0.57 | 3.0E-03 | 0.175 |
| CLASP2   | Cytoplasmic linker associated protein 2                    | -0.44 | 3.0E-03 | 0.175 |
| SLC30A9  | Solute carrier family 30 (zinc transporter), member 9      | -0.53 | 3.0E-03 | 0.176 |
| PSMD4    | Proteasome (prosome, macropain) 26S subunit, non-atpase, 4 | -0.47 | 3.1E-03 | 0.176 |
| KIAA1370 | Kiaa1370                                                   | 0.67  | 3.1E-03 | 0.177 |
| RAD52    | RAD52 homolog (S. Cerevisiae)                              | 0.46  | 3.1E-03 | 0.177 |

|               |                                                                           |       |         |       |
|---------------|---------------------------------------------------------------------------|-------|---------|-------|
| C11orf47      | Chromosome 11 open reading frame 47                                       | 0.52  | 3.1E-03 | 0.177 |
| PHC3          | Polyhomeotic homolog 3 (Drosophila)                                       | 0.40  | 3.1E-03 | 0.177 |
| STMN1         | Stathmin 1                                                                | -0.59 | 3.2E-03 | 0.178 |
| C11orf1       | Chromosome 11 open reading frame 1                                        | -0.58 | 3.2E-03 | 0.178 |
| SCGB1A1       | Secretoglobin, family 1A, member 1 (uteroglobin)                          | 0.81  | 3.2E-03 | 0.178 |
| DYNLT3        | Dynein, light chain, Tctex-type 3                                         | -0.85 | 3.2E-03 | 0.178 |
| C2orf28       | Chromosome 2 open reading frame 28                                        | -0.42 | 3.2E-03 | 0.178 |
| MRPS9         | Mitochondrial ribosomal protein S9                                        | -0.53 | 3.2E-03 | 0.178 |
| MLXIP         | MLX interacting protein                                                   | 0.37  | 3.2E-03 | 0.178 |
| TMEM182       | Transmembrane protein 182                                                 | -0.77 | 3.2E-03 | 0.178 |
| SNHG1         | Small nucleolar RNA host gene 1 (non-protein coding)                      | 0.96  | 3.3E-03 | 0.179 |
| CCDC61        | Coiled-coil domain containing 61                                          | 0.59  | 3.3E-03 | 0.179 |
| SENP5         | SUMO1/sentrin specific peptidase 5                                        | 0.46  | 3.3E-03 | 0.179 |
| MPP3          | Membrane protein, palmitoylated 3 (MAGUK p55 subfamily member 3)          | -0.46 | 3.3E-03 | 0.179 |
| UBE2D2        | Ubiquitin-conjugating enzyme E2D 2 (UBC4/5 homolog, yeast)                | -0.52 | 3.3E-03 | 0.179 |
| TAC4          | Tachykinin-4                                                              | 0.95  | 3.4E-03 | 0.179 |
| NAIP          | NLR family, apoptosis inhibitory protein                                  | -1.03 | 3.4E-03 | 0.179 |
| PIP4K2A       | Phosphatidylinositol-5-phosphate 4-kinase, type II, alpha                 | 0.76  | 3.4E-03 | 0.179 |
| PCOLCE2       | Procollagen C-endopeptidase enhancer 2                                    | -0.76 | 3.4E-03 | 0.179 |
| CAPN2         | Calpain 2, (m/II) large subunit                                           | 0.42  | 3.4E-03 | 0.179 |
| ANAPC13       | Anaphase promoting complex subunit 13                                     | -0.50 | 3.4E-03 | 0.179 |
| LBX2          | Ladybird homeobox 2                                                       | 0.79  | 3.4E-03 | 0.179 |
| SNORD59B      | Small nucleolar RNA, C/D box 59B                                          | 1.51  | 3.4E-03 | 0.179 |
| DKFZP564J0863 | Atlastin gtpase 3                                                         | 0.67  | 3.4E-03 | 0.179 |
| COX5B         | Cytochrome c oxidase subunit Vb                                           | -0.37 | 3.4E-03 | 0.179 |
| INE1          | Inactivation escape 1 (non-protein coding)                                | 0.57  | 3.4E-03 | 0.179 |
| RUFY3         | RUN and FYVE domain containing 3                                          | 0.54  | 3.4E-03 | 0.179 |
| C3orf1        | Chromosome 3 open reading frame 1                                         | -0.56 | 3.5E-03 | 0.180 |
| MSH4          | Muts homolog 4 (E. Coli)                                                  | 0.79  | 3.5E-03 | 0.180 |
| MOXD1         | Monooxygenase, DBH-like 1                                                 | -0.66 | 3.5E-03 | 0.180 |
| KRTAP5-8      | Keratin associated protein 5-8                                            | 0.87  | 3.5E-03 | 0.180 |
| SLC25A20      | Solute carrier family 25 (carnitine/acylcarnitine translocase), member 20 | -0.53 | 3.5E-03 | 0.180 |
| EXTL2         | Exostoses (multiple)-like 2                                               | -0.53 | 3.5E-03 | 0.180 |
| BCL10         | B-cell CLL/lymphoma 10                                                    | 0.52  | 3.6E-03 | 0.180 |
| CMAS          | Cytidine monophosphate N-acetylneuraminic acid synthetase                 | -0.63 | 3.6E-03 | 0.180 |
| MBD3          | Methyl-cpg binding domain protein 3                                       | 0.51  | 3.6E-03 | 0.180 |
| TMEM18        | Transmembrane protein 18                                                  | -0.64 | 3.6E-03 | 0.180 |
| EYA1          | Eyes absent homolog 1 (Drosophila)                                        | 0.46  | 3.6E-03 | 0.180 |
| KLF7          | Kruppel-like factor 7 (ubiquitous)                                        | 0.52  | 3.6E-03 | 0.180 |

|                 |                                                                                |       |         |       |
|-----------------|--------------------------------------------------------------------------------|-------|---------|-------|
| LARP4           | La ribonucleoprotein domain family, member 4                                   | 0.55  | 3.6E-03 | 0.180 |
| OTX2            | Orthodenticle homeobox 2                                                       | 1.51  | 3.6E-03 | 0.180 |
| GSTZ1           | Glutathione transferase zeta 1                                                 | -0.75 | 3.7E-03 | 0.181 |
| BAHD1           | Bromo adjacent homology domain containing 1                                    | 0.54  | 3.7E-03 | 0.181 |
| NDUFV3          | NADH dehydrogenase (ubiquinone) flavoprotein 3, 10kda                          | -0.61 | 3.7E-03 | 0.181 |
| MRPS23          | Mitochondrial ribosomal protein S23                                            | -0.63 | 3.7E-03 | 0.181 |
| PDHB            | Pyruvate dehydrogenase (lipoamide) beta                                        | -0.52 | 3.7E-03 | 0.181 |
| ATXN2L          | Ataxin 2-like                                                                  | 0.42  | 3.7E-03 | 0.181 |
| TIMM23          | Translocase of inner mitochondrial membrane 23 homolog (yeast)                 | -0.65 | 3.7E-03 | 0.181 |
| C17orf38        | Phosphoinositide-3-kinase, regulatory subunit 6                                | -1.01 | 3.7E-03 | 0.181 |
| SNORD83B        | Small nucleolar RNA, C/D box 83B                                               | 0.88  | 3.8E-03 | 0.182 |
| DYNC111         | Dynein, cytoplasmic 1, intermediate chain 1                                    | -0.69 | 3.8E-03 | 0.182 |
| CD74            | CD74 molecule, major histocompatibility complex, class II invariant chain      | -1.10 | 3.8E-03 | 0.182 |
| C11orf41        | Chromosome 11 open reading frame 41                                            | 0.50  | 3.8E-03 | 0.182 |
| ATP5H           | ATP synthase, H <sup>+</sup> transporting, mitochondrial Fo complex, subunit d | -0.45 | 3.8E-03 | 0.182 |
| SCN4A           | Sodium channel, voltage-gated, type IV, alpha subunit                          | 0.79  | 3.8E-03 | 0.182 |
| RNU4B2          | RNA, U4 small nuclear 1                                                        | 1.36  | 3.9E-03 | 0.184 |
| ACTL6A          | Actin-like 6A                                                                  | -0.48 | 3.9E-03 | 0.184 |
| HELZ            | Helicase with zinc finger                                                      | 0.51  | 3.9E-03 | 0.184 |
| ACP2            | Acid phosphatase 2, lysosomal                                                  | -0.55 | 3.9E-03 | 0.184 |
| FLJ27365        | Flj27365                                                                       | 0.63  | 3.9E-03 | 0.184 |
| TOP2B           | Topoisomerase (DNA) II beta 180kda                                             | -0.39 | 3.9E-03 | 0.184 |
| COL4A1          | Collagen, type IV, alpha 1                                                     | 0.68  | 3.9E-03 | 0.184 |
| TADA1L          | Transcriptional adaptor 1 (HFI1 homolog, yeast) like                           | -0.60 | 4.0E-03 | 0.184 |
| TXNL4A          | Thioredoxin-like 4A                                                            | -0.56 | 4.0E-03 | 0.184 |
| EIF2C1          | Eukaryotic translation initiation factor 2C, 1                                 | 0.51  | 4.0E-03 | 0.184 |
| HSD17B6         | Hydroxysteroid (17-beta) dehydrogenase 6 homolog (mouse)                       | -0.55 | 4.0E-03 | 0.184 |
| SPON2           | Spondin 2, extracellular matrix protein                                        | 0.43  | 4.0E-03 | 0.184 |
| CPOX            | Coproporphyrinogen oxidase                                                     | 0.68  | 4.0E-03 | 0.184 |
| ACOT2           | Acyl-coa thioesterase 2                                                        | -0.45 | 4.0E-03 | 0.184 |
| PGLS            | 6-phosphogluconolactonase                                                      | -0.49 | 4.0E-03 | 0.185 |
| ZNF32           | Zinc finger protein 32                                                         | -0.48 | 4.0E-03 | 0.185 |
| DNAJC10         | Dnaj (Hsp40) homolog, subfamily C, member 10                                   | -0.47 | 4.1E-03 | 0.186 |
| LIN7C           | Lin-7 homolog C (C. Elegans)                                                   | 0.60  | 4.1E-03 | 0.188 |
| LYRM5           | LYR motif containing 5                                                         | -0.48 | 4.2E-03 | 0.189 |
| HIPK1           | Homeodomain interacting protein kinase 1                                       | 0.48  | 4.2E-03 | 0.189 |
| C14orf24        | Family with sequence similarity 177, member A1                                 | -0.69 | 4.2E-03 | 0.189 |
| PTPN14          | Protein tyrosine phosphatase, non-receptor type 14                             | 0.51  | 4.2E-03 | 0.189 |
| ANKHD1-EIF4EBP3 | ANKHD1-EIF4EBP3 readthrough                                                    | 0.97  | 4.2E-03 | 0.189 |
| GPR6            | G protein-coupled receptor 6                                                   | -1.03 | 4.2E-03 | 0.189 |



|          |                                                                       |       |         |       |
|----------|-----------------------------------------------------------------------|-------|---------|-------|
| C16orf42 | Chromosome 16 open reading frame 42                                   | -0.54 | 4.2E-03 | 0.189 |
| LRPAP1   | Low density lipoprotein receptor-related protein associated protein 1 | -0.36 | 4.2E-03 | 0.189 |
| GFOD1    | Glucose-fructose oxidoreductase domain containing 1                   | 0.55  | 4.2E-03 | 0.189 |
| SNX2     | Sorting nexin 2                                                       | -0.55 | 4.3E-03 | 0.189 |
| MFAP4    | Microfibrillar-associated protein 4                                   | 0.65  | 4.3E-03 | 0.189 |
| C16orf72 | Chromosome 16 open reading frame 72                                   | 0.54  | 4.3E-03 | 0.189 |
| DDB2     | Damage-specific DNA binding protein 2, 48kda                          | -0.55 | 4.3E-03 | 0.189 |
| HIPK3    | Homeodomain interacting protein kinase 3                              | 0.52  | 4.3E-03 | 0.189 |
| NPY2R    | Neuropeptide Y receptor Y2                                            | -0.70 | 4.3E-03 | 0.189 |
| DMN      | Synemin, intermediate filament protein                                | 0.60  | 4.3E-03 | 0.189 |
| GPT      | Glutamic-pyruvate transaminase (alanine aminotransferase)             | 0.46  | 4.4E-03 | 0.190 |
| PEX19    | Peroxisomal biogenesis factor 19                                      | -0.57 | 4.4E-03 | 0.190 |
| OR2L13   | Olfactory receptor, family 2, subfamily L, member 13                  | -0.62 | 4.4E-03 | 0.190 |
| BAIAP3   | BAI1-associated protein 3                                             | -0.58 | 4.4E-03 | 0.190 |
| PRELP    | Proline/arginine-rich end leucine-rich repeat protein                 | 0.59  | 4.4E-03 | 0.190 |
| BSG      | Basigin (Ok blood group)                                              | 0.40  | 4.4E-03 | 0.191 |
| PACS1    | Phosphofurin acidic cluster sorting protein 1                         | -0.40 | 4.5E-03 | 0.192 |
| ZNF462   | Zinc finger protein 462                                               | 0.46  | 4.5E-03 | 0.192 |
| COL10A1  | Collagen, type X, alpha 1                                             | 0.85  | 4.5E-03 | 0.192 |
| CRH      | Corticotropin releasing hormone                                       | -0.95 | 4.5E-03 | 0.192 |
| FLCN     | Folliculin                                                            | 0.60  | 4.5E-03 | 0.192 |
| C10orf68 | Chromosome 10 open reading frame 68                                   | 0.59  | 4.5E-03 | 0.193 |
| ZADH1    | Prostaglandin reductase 2                                             | -0.68 | 4.6E-03 | 0.193 |
| MTERFD3  | MTERF domain containing 3                                             | -0.43 | 4.6E-03 | 0.193 |
| FASTKD3  | FAST kinase domains 3                                                 | -0.57 | 4.6E-03 | 0.193 |
| C1orf128 | Chromosome 1 open reading frame 128                                   | -0.67 | 4.6E-03 | 0.193 |
| TGFB3    | Transforming growth factor, beta 3                                    | 0.69  | 4.6E-03 | 0.193 |
| KIAA1546 | Tet oncogene family member 2                                          | 0.60  | 4.6E-03 | 0.193 |
| IL12RB1  | Interleukin 12 receptor, beta 1                                       | -0.99 | 4.6E-03 | 0.193 |
| ZNF490   | Zinc finger protein 490                                               | 0.51  | 4.6E-03 | 0.193 |
| TTC19    | Tetratricopeptide repeat domain 19                                    | -0.40 | 4.6E-03 | 0.193 |
| ACOT9    | Acyl-coa thioesterase 9                                               | -0.56 | 4.7E-03 | 0.193 |
| ZNF815   | Zinc finger protein 815                                               | -0.56 | 4.7E-03 | 0.193 |
| CCR5     | Chemokine (C-C motif) receptor 5                                      | -0.79 | 4.7E-03 | 0.194 |
| C9orf102 | Chromosome 9 open reading frame 102                                   | 0.51  | 4.7E-03 | 0.195 |
| MARCH_6  | Membrane-associated ring finger (C3HC4) 6                             | 0.79  | 4.7E-03 | 0.195 |
| RPA2     | Replication protein A2, 32kda                                         | -0.57 | 4.8E-03 | 0.196 |
| WDR65    | WD repeat domain 65                                                   | -0.86 | 4.8E-03 | 0.196 |
| FXR1     | Fragile X mental retardation, autosomal homolog 1                     | 0.52  | 4.8E-03 | 0.196 |
| HYAL2    | Hyaluronoglucosaminidase 2                                            | 0.59  | 4.8E-03 | 0.196 |
| NBR1     | Neighbor of BRCA1 gene 1                                              | -0.51 | 4.8E-03 | 0.196 |
| PLAC9    | Placenta-specific 9                                                   | 0.66  | 4.9E-03 | 0.199 |

Table S3. Genes with differential expression ( $P < 0.01$ , FDR  $< 0.4$ ) observed in alcoholic individuals

| <b>Gene Symbol</b> | <b>Gene Name</b>                                                    | <b>Log FC</b> | <b>P value</b> | <b>FDR</b> |
|--------------------|---------------------------------------------------------------------|---------------|----------------|------------|
| HIST1H4E           | Histone cluster 1, h4e                                              | 1.70          | 2.5E-11        | 0.000      |
| PAPD1              | Mitochondrial poly(A) polymerase                                    | 1.17          | 1.1E-07        | 0.001      |
| TMC3               | Transmembrane channel-like 3                                        | 1.21          | 7.2E-07        | 0.004      |
| FAM123A            | Family with sequence similarity 123A                                | 0.92          | 8.0E-07        | 0.004      |
| SNORD89            | Small nucleolar RNA, C/D box 89                                     | 1.30          | 1.1E-06        | 0.004      |
| CDR1               | Cerebellar degeneration-related protein 1, 34kda                    | 1.36          | 1.1E-06        | 0.004      |
| USP6               | Ubiquitin specific peptidase 6 (Tre-2 oncogene)                     | -1.50         | 2.9E-06        | 0.008      |
| ERF                | Ets2 repressor factor                                               | 0.82          | 8.7E-06        | 0.018      |
| SNORD42A           | Small nucleolar RNA, C/D box 42A                                    | -1.48         | 1.1E-05        | 0.018      |
| SCARNA17           | Small Cajal body-specific RNA 17                                    | 1.08          | 3.0E-05        | 0.042      |
| RN7SK              | RNA, 7SK small nuclear                                              | 1.31          | 3.6E-05        | 0.044      |
| LENG8              | Leukocyte receptor cluster (LRC) member 8                           | 0.72          | 6.2E-05        | 0.066      |
| CCR5               | Chemokine (C-C motif) receptor 5                                    | -1.19         | 7.4E-05        | 0.070      |
| SNORD116-29        | Small nucleolar RNA, C/D box 116-29                                 | -1.82         | 1.2E-04        | 0.103      |
| LTK                | Leukocyte receptor tyrosine kinase                                  | 1.28          | 1.3E-04        | 0.104      |
| LRCH4              | Leucine-rich repeats and calponin homology (CH) domain containing 4 | 0.65          | 1.5E-04        | 0.112      |
| CNP                | 2',3'-cyclic nucleotide 3' phosphodiesterase                        | 0.91          | 1.5E-04        | 0.112      |
| TRIMP1             | Tripartite motif-containing pseudogene 1                            | -1.39         | 1.8E-04        | 0.124      |
| RNY5               | RNA, Ro-associated Y5                                               | -1.48         | 1.9E-04        | 0.129      |
| SEL1L              | Sel-1 suppressor of lin-12-like (C. Elegans)                        | 0.63          | 2.1E-04        | 0.138      |
| SNORA47            | Small nucleolar RNA, H/ACA box 47                                   | 1.48          | 2.3E-04        | 0.140      |
| TAOK2              | TAO kinase 2                                                        | 0.68          | 2.4E-04        | 0.141      |
| POLR1B             | Polymerase (RNA) I polypeptide B, 128kda                            | -0.60         | 2.7E-04        | 0.141      |
| ZGPAT              | Zinc finger, CCCH-type with G patch domain                          | 0.51          | 2.7E-04        | 0.141      |
| HNRPH1             | Heterogeneous nuclear ribonucleoprotein H1                          | 0.72          | 2.7E-04        | 0.141      |
| HIVEP3             | Human immunodeficiency virus type I enhancer binding protein 3      | 0.59          | 3.3E-04        | 0.163      |
| KCNA2              | Potassium voltage-gated channel, shaker-related subfamily, member 2 | 0.74          | 3.7E-04        | 0.171      |
| RANBP3L            | RAN binding protein 3-like                                          | -0.79         | 3.9E-04        | 0.171      |
| C9orf3             | Aminopeptidase O                                                    | 0.73          | 4.0E-04        | 0.171      |
| SEMA7A             | Semaphorin 7A, GPI membrane anchor (John Milton Hagen blood group)  | 0.73          | 4.1E-04        | 0.171      |
| MSH4               | Muts homolog 4 (E. Coli)                                            | 0.99          | 4.2E-04        | 0.171      |
| ABCA2              | ATP-binding cassette, sub-family A (ABC1), member 2                 | 0.73          | 4.2E-04        | 0.171      |
| ADAMTS4            | ADAM metalloproteinase with thrombospondin type 1 motif, 4          | 0.79          | 4.3E-04        | 0.171      |

|           |                                                                                    |       |         |       |
|-----------|------------------------------------------------------------------------------------|-------|---------|-------|
| SPCS3     | Signal peptidase complex subunit 3 homolog (S. Cerevisiae)                         | 0.84  | 4.4E-04 | 0.171 |
| RAB11FIP4 | RAB11 family interacting protein 4 (class II)                                      | 0.61  | 4.6E-04 | 0.171 |
| FRMD5     | FERM domain containing 5                                                           | 0.78  | 4.6E-04 | 0.171 |
| CENTB5    | Arfgap with coiled-coil, ankyrin repeat and PH domains 3                           | 0.61  | 4.7E-04 | 0.171 |
| CACNB2    | Calcium channel, voltage-dependent, beta 2 subunit                                 | 0.61  | 4.8E-04 | 0.171 |
| MAOA      | Monoamine oxidase A                                                                | -0.81 | 4.8E-04 | 0.171 |
| CNOT6     | CCR4-NOT transcription complex subunit 6                                           | 0.74  | 5.1E-04 | 0.176 |
| C9orf139  | Chromosome 9 open reading frame 139                                                | 0.89  | 5.2E-04 | 0.176 |
| PACS2     | Phosphofurin acidic cluster sorting protein 2                                      | 0.56  | 5.2E-04 | 0.176 |
| RNU5B     | U5B small nuclear 1                                                                | -1.55 | 5.4E-04 | 0.176 |
| C16orf72  | Chromosome 16 open reading frame 72                                                | 0.66  | 6.0E-04 | 0.186 |
| EXOC6B    | Exocyst complex component 6B                                                       | 0.55  | 6.4E-04 | 0.190 |
| RBM34     | RNA binding motif protein 34                                                       | -0.75 | 6.4E-04 | 0.190 |
| TNRC6C    | Trinucleotide repeat containing 6C                                                 | 0.69  | 6.5E-04 | 0.190 |
| SNORA73A  | Small nucleolar RNA, H/ACA box 73A                                                 | 0.81  | 6.5E-04 | 0.190 |
| ZCWPW1    | Zinc finger, CW type with PWWP domain 1                                            | 0.50  | 8.0E-04 | 0.218 |
| VPS53     | Vacuolar protein sorting 53 homolog (S. Cerevisiae)                                | 0.73  | 8.8E-04 | 0.231 |
| DDX17     | DEAD (Asp-Glu-Ala-Asp) box polypeptide 17                                          | 0.49  | 9.1E-04 | 0.232 |
| NADSYN1   | NAD synthetase 1                                                                   | 0.60  | 9.3E-04 | 0.233 |
| PSMD12    | Proteasome (prosome, macropain) 26S subunit, non-atpase, 12                        | 0.86  | 9.6E-04 | 0.237 |
| C4orf12   | Chromosome 4 open reading frame 12                                                 | 0.62  | 9.6E-04 | 0.237 |
| CETN2     | Centrin, EF-hand protein, 2                                                        | -0.57 | 1.0E-03 | 0.237 |
| ZIM2      | Zinc finger, imprinted 2                                                           | 0.79  | 1.0E-03 | 0.237 |
| TMEM165   | Transmembrane protein 165                                                          | 0.62  | 1.1E-03 | 0.237 |
| IRGQ      | Immunity-related gtpase family, Q                                                  | 0.53  | 1.1E-03 | 0.237 |
| ZDHHC11B  | Zinc finger, DHHC-type containing 11B                                              | 0.99  | 1.1E-03 | 0.237 |
| PPP1R16B  | Protein phosphatase 1, regulatory (inhibitor) subunit 16B                          | 0.51  | 1.1E-03 | 0.237 |
| CREB5     | Camp responsive element binding protein 5                                          | 0.75  | 1.1E-03 | 0.237 |
| MORC1     | MORC family CW-type zinc finger 1                                                  | -1.19 | 1.2E-03 | 0.238 |
| NFKBIZ    | Nuclear factor of kappa light polypeptide gene enhancer in B-cells inhibitor, zeta | -0.71 | 1.2E-03 | 0.245 |
| DDX39     | DEAD (Asp-Glu-Ala-Asp) box polypeptide 39                                          | 0.60  | 1.2E-03 | 0.245 |
| GPD2      | Glycerol-3-phosphate dehydrogenase 2 (mitochondrial)                               | -0.49 | 1.2E-03 | 0.245 |
| SNORD21   | Small nucleolar RNA, C/D box 21                                                    | -0.80 | 1.3E-03 | 0.250 |
| FKBP7     | FK506-binding protein 7                                                            | -0.94 | 1.3E-03 | 0.250 |
| NXPH3     | Neurexophilin 3                                                                    | 0.77  | 1.3E-03 | 0.250 |
| PGRMC2    | Progesterone receptor membrane component 2                                         | 0.63  | 1.3E-03 | 0.250 |
| MID1IP1   | MID1 interacting protein 1 (gastrulation specific G12 homolog (zebrafish))         | 0.62  | 1.3E-03 | 0.250 |
| C1orf84   | Chromosome 1 open reading frame 84                                                 | 0.86  | 1.3E-03 | 0.250 |

|                      |                                                                                                 |       |         |       |
|----------------------|-------------------------------------------------------------------------------------------------|-------|---------|-------|
| <i>GNL3L</i>         | <i>Guanine nucleotide binding protein-like 3 (nucleolar)-like</i>                               | -0.55 | 1.4E-03 | 0.250 |
| <i>MDM2</i>          | <i>Mdm2 p53 binding protein homolog (mouse)</i>                                                 | 0.51  | 1.5E-03 | 0.259 |
| <i>C22orf9</i>       | <i>Uncharacterized protein c22orf9</i>                                                          | 0.55  | 1.5E-03 | 0.268 |
| <i>ARHGEF18</i>      | <i>Rho/Rac guanine nucleotide exchange factor (GEF) 18</i>                                      | 0.41  | 1.6E-03 | 0.275 |
| <i>PPCS</i>          | <i>Phosphopantothenoylcysteine synthetase</i>                                                   | -0.61 | 1.7E-03 | 0.279 |
| <i>GPR62</i>         | <i>G protein-coupled receptor 62</i>                                                            | 0.54  | 1.7E-03 | 0.281 |
| <i>FAM151A</i>       | <i>Family with sequence similarity 151, member A</i>                                            | -0.64 | 1.7E-03 | 0.285 |
| <i>MAMDC4</i>        | <i>MAM domain containing 4</i>                                                                  | 0.49  | 1.8E-03 | 0.285 |
| <i>TCEA1</i>         | <i>Transcription elongation factor A (SII), 1</i>                                               | -0.71 | 1.8E-03 | 0.285 |
| <i>COL10A1</i>       | <i>Collagen, type X, alpha 1</i>                                                                | 0.94  | 1.9E-03 | 0.289 |
| <i>CIQL3</i>         | <i>Complement c1q-like protein 3</i>                                                            | -1.03 | 1.9E-03 | 0.297 |
| <i>TMEM168</i>       | <i>Transmembrane protein 168</i>                                                                | -0.57 | 2.0E-03 | 0.304 |
| <i>MBD3</i>          | <i>Methyl-cpg-binding domain protein 3</i>                                                      | 0.55  | 2.0E-03 | 0.304 |
| <i>DKFZP434B0335</i> | <i>Tectonin beta-propeller repeat containing 1</i>                                              | 0.48  | 2.1E-03 | 0.304 |
| <i>GJC2</i>          | <i>Gap junction protein, gamma 2, 47kda</i>                                                     | 0.67  | 2.1E-03 | 0.304 |
| <i>CCDC137</i>       | <i>Coiled-coil domain containing 137</i>                                                        | 0.61  | 2.1E-03 | 0.304 |
| <i>GSK3B</i>         | <i>Glycogen synthase kinase 3 beta</i>                                                          | -0.63 | 2.1E-03 | 0.304 |
| <i>C2orf62</i>       | <i>Chromosome 2 open reading frame 62</i>                                                       | -0.95 | 2.1E-03 | 0.304 |
| <i>HISPPD1</i>       | <i>Histidine acid phosphatase domain containing 1</i>                                           | -0.50 | 2.2E-03 | 0.304 |
| <i>ELP3</i>          | <i>Elongation protein 3 homolog (S. Cerevisiae)</i>                                             | 0.53  | 2.2E-03 | 0.304 |
| <i>AGXT2L1</i>       | <i>Alanine-glyoxylate aminotransferase 2-like 1</i>                                             | -0.80 | 2.2E-03 | 0.304 |
| <i>ADAMTS18</i>      | <i>ADAM metallopeptidase with thrombospondin type 1 motif, 18</i>                               | 1.04  | 2.2E-03 | 0.304 |
| <i>CPOX</i>          | <i>Coproporphyrinogen oxidase</i>                                                               | 0.73  | 2.3E-03 | 0.308 |
| <i>PWWP2B</i>        | <i>PWWP domain containing 2B</i>                                                                | 0.60  | 2.3E-03 | 0.310 |
| <i>RAMP3</i>         | <i>Receptor (G protein-coupled) activity modifying protein 3</i>                                | 0.66  | 2.4E-03 | 0.310 |
| <i>DDX24</i>         | <i>DEAD (Asp-Glu-Ala-Asp) box polypeptide 24</i>                                                | -0.57 | 2.4E-03 | 0.310 |
| <i>DNAJA2</i>        | <i>Dnaj (Hsp40) homolog, subfamily A, member 2</i>                                              | 0.62  | 2.4E-03 | 0.315 |
| <i>CLDN11</i>        | <i>Claudin 11</i>                                                                               | 0.70  | 2.4E-03 | 0.316 |
| <i>CTDSPL2</i>       | <i>CTD (carboxy-terminal domain, RNA polymerase II, polypeptide A) small phosphatase like 2</i> | 0.59  | 2.5E-03 | 0.320 |
| <i>ABCG1</i>         | <i>ATP-binding cassette, sub-family G (WHITE), member 1</i>                                     | 0.50  | 2.6E-03 | 0.323 |
| <i>CCDC148</i>       | <i>Coiled-coil domain containing 148</i>                                                        | -0.55 | 2.6E-03 | 0.323 |
| <i>EHBP1</i>         | <i>EH domain binding protein 1</i>                                                              | -0.51 | 2.6E-03 | 0.323 |
| <i>C10orf93</i>      | <i>Chromosome 10 open reading frame 93</i>                                                      | 0.76  | 2.7E-03 | 0.323 |
| <i>L3MBTL</i>        | <i>L(3)mbt-like (Drosophila)</i>                                                                | 0.45  | 2.7E-03 | 0.323 |
| <i>GNRHR2</i>        | <i>Gonadotropin-releasing hormone (type 2) receptor 2</i>                                       | -0.52 | 2.8E-03 | 0.323 |
| <i>DOCK5</i>         | <i>Dedicator of cytokinesis 5</i>                                                               | 0.56  | 2.8E-03 | 0.323 |
| <i>NTSR2</i>         | <i>Neurotensin receptor 2</i>                                                                   | -0.69 | 2.8E-03 | 0.323 |
| <i>CDKL3</i>         | <i>Cyclin-dependent kinase-like 3</i>                                                           | -0.65 | 2.8E-03 | 0.323 |

|                |                                                                                                          |       |         |       |
|----------------|----------------------------------------------------------------------------------------------------------|-------|---------|-------|
| <i>WBP11P1</i> | <i>WW domain binding protein 11 pseudogene 1</i>                                                         | -0.61 | 2.8E-03 | 0.323 |
| <i>PRAF2</i>   | <i>PRA1 domain family, member 2</i>                                                                      | -0.48 | 2.8E-03 | 0.323 |
| <i>SNHG10</i>  | <i>Small nucleolar RNA host gene 10 (non-protein coding)</i>                                             | -0.80 | 2.8E-03 | 0.323 |
| <i>GNA13</i>   | <i>Guanine nucleotide binding protein (G protein), alpha 13</i>                                          | -0.54 | 2.8E-03 | 0.323 |
| <i>RAD21</i>   | <i>RAD21 homolog (S. Pombe)</i>                                                                          | -0.60 | 2.9E-03 | 0.323 |
| <i>LMTK2</i>   | <i>Lemur tyrosine kinase 2</i>                                                                           | 0.52  | 2.9E-03 | 0.323 |
| <i>HIP1R</i>   | <i>Huntingtin interacting protein 1 related</i>                                                          | 0.53  | 2.9E-03 | 0.325 |
| <i>TCF6L1</i>  | <i>Transcription factor 6-like 1 (mitochondrial transcription factor 1-like)</i>                         | -1.07 | 3.1E-03 | 0.333 |
| <i>ZNF497</i>  | <i>Zinc finger protein 497</i>                                                                           | 0.45  | 3.1E-03 | 0.333 |
| <i>RSPO3</i>   | <i>R-spondin 3 homolog (Xenopus laevis)</i>                                                              | -0.85 | 3.1E-03 | 0.333 |
| <i>RSRC1</i>   | <i>Arginine/serine-rich coiled-coil 1</i>                                                                | -0.59 | 3.1E-03 | 0.333 |
| <i>CDKN1B</i>  | <i>Cyclin-dependent kinase inhibitor 1B (p27, Kip1)</i>                                                  | 0.48  | 3.1E-03 | 0.333 |
| <i>SNIP</i>    | <i>SRC kinase signaling inhibitor 1</i>                                                                  | 0.62  | 3.1E-03 | 0.333 |
| <i>IL17RD</i>  | <i>Interleukin 17 receptor D</i>                                                                         | -0.44 | 3.1E-03 | 0.333 |
| <i>HTATSF1</i> | <i>HIV-1 Tat specific factor 1</i>                                                                       | -0.48 | 3.2E-03 | 0.336 |
| <i>CCDC91</i>  | <i>Coiled-coil domain containing 91</i>                                                                  | -0.72 | 3.2E-03 | 0.337 |
| <i>LARP6</i>   | <i>La ribonucleoprotein domain family, member 6</i>                                                      | 0.45  | 3.3E-03 | 0.343 |
| <i>MUTYH</i>   | <i>Muty homolog (E. Coli)</i>                                                                            | 0.64  | 3.4E-03 | 0.346 |
| <i>FAM131B</i> | <i>Family with sequence similarity 131, member B</i>                                                     | 0.52  | 3.4E-03 | 0.346 |
| <i>CTDSP2</i>  | <i>CTD (carboxy-terminal domain, RNA polymerase II, polypeptide A) small phosphatase 2</i>               | 0.44  | 3.4E-03 | 0.346 |
| <i>PIGG</i>    | <i>Phosphatidylinositol glycan anchor biosynthesis, class G</i>                                          | 0.45  | 3.4E-03 | 0.346 |
| <i>TTC7A</i>   | <i>Tetratricopeptide repeat domain 7A</i>                                                                | 0.37  | 3.4E-03 | 0.346 |
| <i>LPO</i>     | <i>Lactoperoxidase</i>                                                                                   | 1.24  | 3.5E-03 | 0.347 |
| <i>RUNX2</i>   | <i>Runt-related transcription factor 2</i>                                                               | 0.68  | 3.5E-03 | 0.347 |
| <i>IGSF9B</i>  | <i>Immunoglobulin superfamily, member 9B</i>                                                             | 0.76  | 3.5E-03 | 0.347 |
| <i>ARMC3</i>   | <i>Armadillo repeat containing 3</i>                                                                     | -0.84 | 3.5E-03 | 0.347 |
| <i>ACTR3B</i>  | <i>ARP3 actin-related protein 3 homolog B (yeast)</i>                                                    | 0.54  | 3.5E-03 | 0.347 |
| <i>SMARCA2</i> | <i>SWI/SNF related, matrix associated, actin dependent regulator of chromatin, subfamily a, member 2</i> | -0.58 | 3.6E-03 | 0.349 |
| <i>SMAD7</i>   | <i>SMAD family member 7</i>                                                                              | 0.46  | 3.6E-03 | 0.349 |
| <i>MYO1B</i>   | <i>Myosin IB</i>                                                                                         | -0.61 | 3.6E-03 | 0.349 |
| <i>DSCAML1</i> | <i>Down syndrome cell adhesion molecule like 1</i>                                                       | 0.45  | 3.6E-03 | 0.349 |
| <i>CXCL5</i>   | <i>Chemokine (C-X-C motif) ligand 5</i>                                                                  | -0.83 | 3.7E-03 | 0.351 |
| <i>TFR2</i>    | <i>Transferrin receptor 2</i>                                                                            | -0.57 | 3.7E-03 | 0.351 |
| <i>CCDC61</i>  | <i>Coiled-coil domain containing 61</i>                                                                  | 0.58  | 3.7E-03 | 0.351 |
| <i>POLR2A</i>  | <i>Polymerase (RNA) II (DNA directed) polypeptide A, 220kda</i>                                          | -0.51 | 3.7E-03 | 0.351 |
| <i>PRKCA</i>   | <i>Protein kinase C, alpha</i>                                                                           | -0.51 | 3.8E-03 | 0.352 |
| <i>PLDN</i>    | <i>Pallidin homolog (mouse)</i>                                                                          | -0.68 | 3.8E-03 | 0.352 |
| <i>PCTK3</i>   | <i>PCTAIRE protein kinase 3</i>                                                                          | 0.63  | 3.8E-03 | 0.352 |

|                 |                                                                                                            |       |         |       |
|-----------------|------------------------------------------------------------------------------------------------------------|-------|---------|-------|
| <i>CYP4Z1</i>   | Cytochrome P450, family 4, subfamily Z, polypeptide 1                                                      | -1.01 | 3.9E-03 | 0.352 |
| <i>OSBPL8</i>   | Oxysterol binding protein-like 8                                                                           | -0.51 | 3.9E-03 | 0.352 |
| <i>AJAP1</i>    | Adherens junctions associated protein 1                                                                    | -0.76 | 4.0E-03 | 0.352 |
| <i>SHOX2</i>    | Short stature homeobox 2                                                                                   | 1.23  | 4.0E-03 | 0.352 |
| <i>NR2E1</i>    | Nuclear receptor subfamily 2, group E, member 1                                                            | -0.56 | 4.0E-03 | 0.352 |
| <i>KIAA0329</i> | Tectonin beta-propeller repeat containing 2                                                                | 0.74  | 4.0E-03 | 0.352 |
| <i>NEBL</i>     | Nebulette                                                                                                  | -0.52 | 4.0E-03 | 0.352 |
| <i>SFRS6</i>    | Splicing factor, arginine/serine-rich 6                                                                    | 0.58  | 4.0E-03 | 0.352 |
| <i>REM1</i>     | RAS (RAD and GEM)-like GTP-binding 1                                                                       | 0.79  | 4.0E-03 | 0.352 |
| <i>TTC21A</i>   | Tetratricopeptide repeat domain 21A                                                                        | 0.48  | 4.0E-03 | 0.352 |
| <i>ZNF248</i>   | Zinc finger protein 248                                                                                    | 0.48  | 4.0E-03 | 0.352 |
| <i>ACBD7</i>    | Acyl-Coenzyme A binding domain containing 7                                                                | -0.68 | 4.2E-03 | 0.352 |
| <i>STX4</i>     | Syntaxin 4                                                                                                 | 0.45  | 4.2E-03 | 0.352 |
| <i>CDC40</i>    | Cell division cycle 40 homolog ( <i>S. Cerevisiae</i> )                                                    | -1.02 | 4.2E-03 | 0.352 |
| <i>C18orf1</i>  | Chromosome 18 open reading frame 1                                                                         | 0.45  | 4.2E-03 | 0.352 |
| <i>PGM1</i>     | Phosphoglucomutase 1                                                                                       | -0.40 | 4.2E-03 | 0.352 |
| <i>DLEU2L</i>   | Deleted in lymphocytic leukemia 2-like                                                                     | -0.99 | 4.3E-03 | 0.353 |
| <i>MUPCDH</i>   | Mucin-like protocadherin                                                                                   | 0.65  | 4.3E-03 | 0.353 |
| <i>GSN</i>      | Gelsolin (amyloidosis, Finnish type)                                                                       | 0.48  | 4.3E-03 | 0.353 |
| <i>PSEN1</i>    | Presenilin 1                                                                                               | 0.54  | 4.3E-03 | 0.353 |
| <i>FLJ23556</i> | Hypothetical protein FLJ23556                                                                              | 0.99  | 4.3E-03 | 0.353 |
| <i>MIF</i>      | Macrophage migration inhibitory factor (glycosylation-inhibiting factor)                                   | 0.52  | 4.4E-03 | 0.354 |
| <i>PMS2L11</i>  | Postmeiotic segregation increased 2-like protein 11                                                        | 0.65  | 4.4E-03 | 0.354 |
| <i>DHX34</i>    | DEAH (Asp-Glu-Ala-His) box polypeptide 34                                                                  | 0.46  | 4.5E-03 | 0.354 |
| <i>SLC1A3</i>   | Solute carrier family 1 (glial high affinity glutamate transporter), member 3                              | -0.70 | 4.5E-03 | 0.354 |
| <i>QDPR</i>     | Quinoid dihydropteridine reductase                                                                         | 0.68  | 4.5E-03 | 0.354 |
| <i>SLC25A36</i> | Solute carrier family 25, member 36                                                                        | -0.43 | 4.6E-03 | 0.354 |
| <i>DEGS2</i>    | Degenerative spermatocyte homolog 2, lipid desaturase ( <i>Drosophila</i> )                                | 0.53  | 4.6E-03 | 0.354 |
| <i>PRKRIR</i>   | Protein-kinase, interferon-inducible double stranded RNA dependent inhibitor, repressor of (P58 repressor) | -0.67 | 4.6E-03 | 0.354 |
| <i>GTF2A1</i>   | General transcription factor IIA, 1, 19/37kda                                                              | 0.48  | 4.6E-03 | 0.354 |
| <i>SNX27</i>    | Sorting nexin family member 27                                                                             | 0.37  | 4.6E-03 | 0.354 |
| <i>SYT1</i>     | Synaptotagmin I                                                                                            | -0.57 | 4.7E-03 | 0.360 |
| <i>MDM4</i>     | Mdm4 p53 binding protein homolog (mouse)                                                                   | 0.54  | 4.7E-03 | 0.360 |
| <i>SDCCAG10</i> | Serologically defined colon cancer antigen 10                                                              | -0.58 | 4.8E-03 | 0.360 |
| <i>C6orf199</i> | Chromosome 6 open reading frame 199                                                                        | -0.70 | 4.8E-03 | 0.362 |
| <i>HNRNPL</i>   | Heterogeneous nuclear ribonucleoprotein L                                                                  | 0.48  | 4.8E-03 | 0.362 |
| <i>PAFAH1B2</i> | Platelet-activating factor acetylhydrolase, isoform 1b, subunit 2 (30kda)                                  | 0.51  | 4.9E-03 | 0.362 |
| <i>HARS2</i>    | Histidyl-trna synthetase 2, mitochondrial (putative)                                                       | 0.72  | 4.9E-03 | 0.362 |
| <i>BINI</i>     | Bridging integrator 1                                                                                      | 0.48  | 4.9E-03 | 0.362 |

|                  |                                                                                   |       |         |       |
|------------------|-----------------------------------------------------------------------------------|-------|---------|-------|
| <i>HSP90AB2P</i> | <i>Heat shock protein 90kda alpha (cytosolic), class B member 2 (pseudogene)</i>  | -1.39 | 4.9E-03 | 0.362 |
| <i>CSNK1G2</i>   | <i>Casein kinase 1, gamma 2</i>                                                   | 0.46  | 5.0E-03 | 0.362 |
| <i>PCBP4</i>     | <i>Poly(rc) binding protein 4</i>                                                 | 0.47  | 5.0E-03 | 0.362 |
| <i>NOLA1</i>     | <i>GAR1 ribonucleoprotein homolog (yeast)</i>                                     | 0.53  | 5.0E-03 | 0.362 |
| <i>NUDT3</i>     | <i>Nudix (nucleoside diphosphate linked moiety X)-type motif 3</i>                | 0.57  | 5.0E-03 | 0.362 |
| <i>EAPP</i>      | <i>E2F-associated phosphoprotein</i>                                              | -0.66 | 5.0E-03 | 0.362 |
| <i>CD99L2</i>    | <i>CD99 molecule-like 2</i>                                                       | 0.39  | 5.1E-03 | 0.362 |
| <i>PPP1R14A</i>  | <i>Protein phosphatase 1 regulatory subunit 14A</i>                               | 0.76  | 5.1E-03 | 0.362 |
| <i>KIAA1659</i>  | <i>KIAA1659 protein</i>                                                           | 0.99  | 5.1E-03 | 0.362 |
| <i>PLXDC2</i>    | <i>Plexin domain containing 2</i>                                                 | 0.53  | 5.2E-03 | 0.362 |
| <i>TINP1</i>     | <i>Ribosome biogenesis protein NSA2 homolog</i>                                   | -0.79 | 5.2E-03 | 0.362 |
| <i>RGS12</i>     | <i>Regulator of G-protein signaling 12</i>                                        | 0.64  | 5.2E-03 | 0.362 |
| <i>RSL1D1</i>    | <i>Ribosomal L1 domain containing 1</i>                                           | -0.57 | 5.2E-03 | 0.362 |
| <i>RHOT2</i>     | <i>Ras homolog gene family, member T2</i>                                         | 0.40  | 5.3E-03 | 0.362 |
| <i>ZNF589</i>    | <i>Zinc finger protein 589</i>                                                    | 0.36  | 5.3E-03 | 0.362 |
| <i>RNF138P1</i>  | <i>Ring finger protein 138 pseudogene 1</i>                                       | 0.66  | 5.3E-03 | 0.362 |
| <i>POLR3G</i>    | <i>Polymerase (RNA) III (DNA directed) polypeptide G (32kd)</i>                   | -0.65 | 5.3E-03 | 0.362 |
| <i>TMEM135</i>   | <i>Transmembrane protein 135</i>                                                  | -0.41 | 5.3E-03 | 0.362 |
| <i>FLNC</i>      | <i>Filamin C, gamma</i>                                                           | 0.41  | 5.4E-03 | 0.362 |
| <i>HP1BP3</i>    | <i>Heterochromatin protein 1, binding protein 3</i>                               | -0.49 | 5.4E-03 | 0.363 |
| <i>SH3GLB2</i>   | <i>SH3-domain GRB2-like endophilin B2</i>                                         | 0.51  | 5.4E-03 | 0.363 |
| <i>TRIB1</i>     | <i>Tribbles homolog 1 (Drosophila)</i>                                            | -0.55 | 5.5E-03 | 0.363 |
| <i>CCDC60</i>    | <i>Coiled-coil domain containing 60</i>                                           | -1.03 | 5.5E-03 | 0.363 |
| <i>ATP1B2</i>    | <i>Atpase, Na<sup>+</sup>/K<sup>+</sup> transporting, beta 2 polypeptide</i>      | -0.81 | 5.5E-03 | 0.363 |
| <i>ADC</i>       | <i>Arginine decarboxylase</i>                                                     | 0.61  | 5.5E-03 | 0.363 |
| <i>PPIL5</i>     | <i>Peptidylprolyl isomerase (cyclophilin)-like 5</i>                              | -0.99 | 5.6E-03 | 0.363 |
| <i>DDAH1</i>     | <i>Dimethylarginine dimethylaminohydrolase 1</i>                                  | -0.57 | 5.6E-03 | 0.363 |
| <i>MAP3K5</i>    | <i>Mitogen-activated protein kinase kinase kinase 5</i>                           | -0.46 | 5.6E-03 | 0.364 |
| <i>FAM3C</i>     | <i>Family with sequence similarity 3, member C</i>                                | 0.82  | 5.7E-03 | 0.364 |
| <i>NUP188</i>    | <i>Nucleoporin 188kda</i>                                                         | 0.45  | 5.7E-03 | 0.364 |
| <i>KIAA1370</i>  | <i>Kiaa1370</i>                                                                   | 0.62  | 5.8E-03 | 0.364 |
| <i>ATP1A2</i>    | <i>Atpase, Na<sup>+</sup>/K<sup>+</sup> transporting, alpha 2 (+) polypeptide</i> | -0.65 | 5.8E-03 | 0.364 |
| <i>PDE10A</i>    | <i>Phosphodiesterase 10A</i>                                                      | -0.51 | 5.8E-03 | 0.364 |
| <i>TPM4</i>      | <i>Tropomyosin 4</i>                                                              | 0.43  | 5.9E-03 | 0.364 |
| <i>NSFL1C</i>    | <i>NSFL1 (p97) cofactor (p47)</i>                                                 | 0.53  | 5.9E-03 | 0.364 |
| <i>PAK3</i>      | <i>P21 protein (Cdc42/Rac)-activated kinase 3</i>                                 | -0.70 | 5.9E-03 | 0.364 |
| <i>MORN3</i>     | <i>MORN repeat containing 3</i>                                                   | -0.48 | 5.9E-03 | 0.364 |
| <i>CHRNA2</i>    | <i>Cholinergic receptor, nicotinic, alpha 2 (neuronal)</i>                        | 0.92  | 5.9E-03 | 0.364 |
| <i>ACOT9</i>     | <i>Acyl-coa thioesterase 9</i>                                                    | -0.54 | 5.9E-03 | 0.364 |
| <i>FLJ10357</i>  | <i>Rho guanine nucleotide exchange factor (GEF) 40</i>                            | -0.48 | 6.0E-03 | 0.364 |
| <i>NLK</i>       | <i>Nemo-like kinase</i>                                                           | 0.59  | 6.0E-03 | 0.364 |
| <i>HIST1H2BD</i> | <i>Histone cluster 1, h2bd</i>                                                    | 0.76  | 6.0E-03 | 0.364 |

|                  |                                                                                       |       |         |       |
|------------------|---------------------------------------------------------------------------------------|-------|---------|-------|
| <i>SNAPC3</i>    | <i>Small nuclear RNA activating complex, polypeptide 3, 50kda</i>                     | 0.58  | 6.0E-03 | 0.364 |
| <i>INHA</i>      | <i>Inhibin, alpha</i>                                                                 | 0.60  | 6.1E-03 | 0.364 |
| <i>ILF2</i>      | <i>Interleukin enhancer binding factor 2, 45kda</i>                                   | -0.41 | 6.1E-03 | 0.364 |
| <i>FLJ25006</i>  | <i>Uncharacterized serine/threonine-protein kinase sgk494</i>                         | -0.47 | 6.3E-03 | 0.372 |
| <i>BMP2K</i>     | <i>BMP2 inducible kinase</i>                                                          | 0.46  | 6.3E-03 | 0.372 |
| <i>FLJ42258</i>  | <i>FLJ42258 protein</i>                                                               | 0.44  | 6.4E-03 | 0.374 |
| <i>PAIP2</i>     | <i>Poly(A) binding protein interacting protein 2</i>                                  | 0.68  | 6.5E-03 | 0.375 |
| <i>SPG20</i>     | <i>Spastic paraplegia 20 (Troyer syndrome)</i>                                        | -0.73 | 6.5E-03 | 0.375 |
| <i>KIAA0427</i>  | <i>Kiaa0427</i>                                                                       | 0.41  | 6.5E-03 | 0.375 |
| <i>YRDC</i>      | <i>Yrdc domain containing (E. Coli)</i>                                               | 0.61  | 6.5E-03 | 0.375 |
| <i>SIRPB1</i>    | <i>Signal-regulatory protein beta 1</i>                                               | -1.12 | 6.6E-03 | 0.375 |
| <i>FAM20A</i>    | <i>Family with sequence similarity 20, member A</i>                                   | 0.69  | 6.6E-03 | 0.375 |
| <i>PSMC1</i>     | <i>Proteasome (prosome, macropain) 26S subunit, atpase, 1</i>                         | -0.75 | 6.6E-03 | 0.375 |
| <i>C2orf55</i>   | <i>Chromosome 2 open reading frame 55</i>                                             | -0.50 | 6.6E-03 | 0.375 |
| <i>SLC31A2</i>   | <i>Solute carrier family 31 (copper transporters), member 2</i>                       | 0.70  | 6.6E-03 | 0.375 |
| <i>GPLD1</i>     | <i>Glycosylphosphatidylinositol specific phospholipase D1</i>                         | -0.52 | 6.7E-03 | 0.375 |
| <i>RPL13</i>     | <i>Ribosomal protein L13</i>                                                          | 0.53  | 6.8E-03 | 0.375 |
| <i>ZNF572</i>    | <i>Zinc finger protein 572</i>                                                        | -0.99 | 6.8E-03 | 0.375 |
| <i>NMD3</i>      | <i>NMD3 homolog (S. Cerevisiae)</i>                                                   | -0.60 | 6.8E-03 | 0.376 |
| <i>MESP2</i>     | <i>Mesoderm posterior 2 homolog (mouse)</i>                                           | -1.01 | 6.9E-03 | 0.376 |
| <i>C20orf116</i> | <i>DDRGK domain containing 1</i>                                                      | 0.46  | 6.9E-03 | 0.377 |
| <i>C11orf37</i>  | <i>Non-protein coding RNA 167</i>                                                     | 0.80  | 6.9E-03 | 0.377 |
| <i>C20orf112</i> | <i>Chromosome 20 open reading frame 112</i>                                           | 0.53  | 7.0E-03 | 0.380 |
| <i>HDAC2</i>     | <i>Histone deacetylase 2</i>                                                          | -0.58 | 7.1E-03 | 0.382 |
| <i>TRIM8</i>     | <i>Tripartite motif-containing 8</i>                                                  | -0.46 | 7.1E-03 | 0.382 |
| <i>HEATR1</i>    | <i>HEAT repeat containing 1</i>                                                       | -0.34 | 7.1E-03 | 0.382 |
| <i>SCN1B</i>     | <i>Sodium channel, voltage-gated, type I, beta</i>                                    | 0.81  | 7.1E-03 | 0.382 |
| <i>DYNLRB2</i>   | <i>Dynein, light chain, roadblock-type 2</i>                                          | -0.63 | 7.2E-03 | 0.382 |
| <i>SLC1A4</i>    | <i>Solute carrier family 1 (glutamate/neutral amino acid transporter), member 4</i>   | -0.59 | 7.2E-03 | 0.382 |
| <i>CYBRD1</i>    | <i>Cytochrome b reductase 1</i>                                                       | -0.48 | 7.2E-03 | 0.382 |
| <i>TTC25</i>     | <i>Tetratricopeptide repeat domain 25</i>                                             | -0.50 | 7.2E-03 | 0.382 |
| <i>FUT1</i>      | <i>Fucosyltransferase 1 (galactoside 2-alpha-L-fucosyltransferase, H blood group)</i> | 0.69  | 7.3E-03 | 0.382 |
| <i>POLR2F</i>    | <i>Polymerase (RNA) II (DNA directed) polypeptide F</i>                               | 0.55  | 7.4E-03 | 0.382 |
| <i>NKX6-2</i>    | <i>NK6 homeobox 2</i>                                                                 | 0.70  | 7.4E-03 | 0.382 |
| <i>ACTN4</i>     | <i>Actinin, alpha 4</i>                                                               | 0.53  | 7.4E-03 | 0.382 |
| <i>PIP4K2A</i>   | <i>Phosphatidylinositol-5-phosphate 4-kinase, type II, alpha</i>                      | 0.68  | 7.4E-03 | 0.382 |
| <i>UBXD2</i>     | <i>UBX domain protein 4</i>                                                           | -0.74 | 7.5E-03 | 0.382 |
| <i>CPLX3</i>     | <i>Complexin 3</i>                                                                    | 0.66  | 7.5E-03 | 0.382 |



|                 |                                                                                                                         |       |         |       |
|-----------------|-------------------------------------------------------------------------------------------------------------------------|-------|---------|-------|
| <i>PGM2L1</i>   | <i>Phosphoglucomutase 2-like 1</i>                                                                                      | -0.55 | 7.5E-03 | 0.382 |
| <i>GABRA2</i>   | <i>Gamma-aminobutyric acid (GABA) A receptor, alpha 2</i>                                                               | -0.52 | 7.5E-03 | 0.382 |
| <i>SNORA2A</i>  | <i>Small nucleolar RNA, H/ACA box 2A</i>                                                                                | -1.14 | 7.5E-03 | 0.382 |
| <i>RNF166</i>   | <i>Ring finger protein 166</i>                                                                                          | 0.47  | 7.6E-03 | 0.383 |
| <i>SEMA4B</i>   | <i>Sema domain, immunoglobulin domain (Ig), transmembrane domain (TM) and short cytoplasmic domain, (semaphorin) 4B</i> | -0.49 | 7.6E-03 | 0.383 |
| <i>C10orf68</i> | <i>Chromosome 10 open reading frame 68</i>                                                                              | -0.55 | 7.7E-03 | 0.383 |
| <i>GALNT13</i>  | <i>UDP-N-acetyl-alpha-D-galactosamine:polypeptide N-acetylgalactosaminyltransferase 13 (galnac-T13)</i>                 | -0.48 | 7.7E-03 | 0.383 |
| <i>CTNNAL1</i>  | <i>Catenin (cadherin-associated protein), alpha-like 1</i>                                                              | -0.59 | 7.7E-03 | 0.383 |
| <i>C7orf10</i>  | <i>Chromosome 7 open reading frame 10</i>                                                                               | -0.68 | 7.7E-03 | 0.383 |
| <i>UFM1</i>     | <i>Ubiquitin-fold modifier 1</i>                                                                                        | -0.50 | 7.8E-03 | 0.383 |
| <i>WASF2</i>    | <i>WAS protein family, member 2</i>                                                                                     | 0.66  | 7.8E-03 | 0.383 |
| <i>XK</i>       | <i>X-linked Kx blood group (mcleod syndrome)</i>                                                                        | -0.52 | 7.8E-03 | 0.383 |
| <i>CYorf15B</i> | <i>Chromosome Y open reading frame 15B</i>                                                                              | -0.41 | 7.8E-03 | 0.383 |
| <i>LGALS8</i>   | <i>Lectin, galactoside-binding, soluble, 8</i>                                                                          | -0.33 | 7.8E-03 | 0.383 |
| <i>CNTN2</i>    | <i>Contactin 2 (axonal)</i>                                                                                             | 0.58  | 7.9E-03 | 0.383 |
| <i>ZNF536</i>   | <i>Zinc finger protein 536</i>                                                                                          | 0.46  | 7.9E-03 | 0.383 |
| <i>MYO9B</i>    | <i>Myosin IXB</i>                                                                                                       | 0.47  | 7.9E-03 | 0.383 |
| <i>PPP3CB</i>   | <i>Protein phosphatase 3 (formerly 2B), catalytic subunit, beta isoform</i>                                             | -0.57 | 7.9E-03 | 0.383 |
| <i>RPL6</i>     | <i>Ribosomal protein L6</i>                                                                                             | -0.67 | 7.9E-03 | 0.383 |
| <i>MOXD1</i>    | <i>Monooxygenase, DBH-like 1</i>                                                                                        | -0.59 | 7.9E-03 | 0.383 |
| <i>ZNF469</i>   | <i>Zinc finger protein 469</i>                                                                                          | 0.39  | 8.0E-03 | 0.383 |
| <i>PLSCR4</i>   | <i>Phospholipid scramblase 4</i>                                                                                        | -0.51 | 8.1E-03 | 0.386 |
| <i>DPY19L3</i>  | <i>Dpy-19-like 3 (C. Elegans)</i>                                                                                       | -0.42 | 8.1E-03 | 0.386 |
| <i>LGI3</i>     | <i>Leucine-rich repeat LGI family, member 3</i>                                                                         | 0.48  | 8.1E-03 | 0.386 |
| <i>RNF182</i>   | <i>Ring finger protein 182</i>                                                                                          | -0.59 | 8.1E-03 | 0.386 |
| <i>ZMPSTE24</i> | <i>Zinc metalloproteinase (STE24 homolog, S. Cerevisiae)</i>                                                            | -0.52 | 8.1E-03 | 0.386 |
| <i>CCBL2</i>    | <i>Cysteine conjugate-beta lyase 2</i>                                                                                  | -0.44 | 8.2E-03 | 0.386 |
| <i>RPLP2</i>    | <i>Ribosomal protein, large, P2</i>                                                                                     | 0.54  | 8.2E-03 | 0.386 |
| <i>TMTC3</i>    | <i>Transmembrane and tetratricopeptide repeat containing 3</i>                                                          | -0.46 | 8.3E-03 | 0.386 |
| <i>IQCK</i>     | <i>IQ motif containing K</i>                                                                                            | 0.50  | 8.3E-03 | 0.386 |
| <i>ADAMTS15</i> | <i>ADAM metalloproteinase with thrombospondin type 1 motif, 15</i>                                                      | 0.59  | 8.3E-03 | 0.386 |
| <i>C9orf57</i>  | <i>Chromosome 9 open reading frame 57</i>                                                                               | 0.59  | 8.3E-03 | 0.386 |
| <i>HBE1</i>     | <i>Hemoglobin, epsilon 1</i>                                                                                            | -0.59 | 8.3E-03 | 0.386 |
| <i>HDGFRP3</i>  | <i>Hepatoma-derived growth factor-related protein 3</i>                                                                 | -0.74 | 8.3E-03 | 0.386 |
| <i>SNORD74</i>  | <i>Small nucleolar RNA, C/D box 74</i>                                                                                  | 0.91  | 8.4E-03 | 0.386 |
| <i>BMP2KL</i>   | <i>BMP2 inducible kinase-like</i>                                                                                       | 0.66  | 8.5E-03 | 0.386 |
| <i>KIAA1430</i> | <i>Kiaa1430</i>                                                                                                         | -0.47 | 8.5E-03 | 0.386 |

|                 |                                                                            |       |         |       |
|-----------------|----------------------------------------------------------------------------|-------|---------|-------|
| <i>LAMA3</i>    | <i>Laminin, alpha 3</i>                                                    | -0.50 | 8.5E-03 | 0.386 |
| <i>RPPH1</i>    | <i>Ribonuclease P RNA component H1</i>                                     | -0.70 | 8.5E-03 | 0.386 |
| <i>CD82</i>     | <i>CD82 molecule</i>                                                       | 0.49  | 8.6E-03 | 0.386 |
| <i>ZMAT3</i>    | <i>Zinc finger, matrin type 3</i>                                          | 0.53  | 8.6E-03 | 0.386 |
| <i>PGAM4</i>    | <i>Phosphoglycerate mutase family member 4</i>                             | -0.67 | 8.6E-03 | 0.386 |
| <i>RRAGB</i>    | <i>Ras-related GTP binding B</i>                                           | -0.43 | 8.6E-03 | 0.386 |
| <i>KIF2C</i>    | <i>Kinesin family member 2C</i>                                            | -0.99 | 8.6E-03 | 0.386 |
| <i>FO XK2</i>   | <i>Forkhead box K2</i>                                                     | 0.33  | 8.7E-03 | 0.386 |
| <i>HMG2L1</i>   | <i>HMG box domain containing 4</i>                                         | -0.56 | 8.7E-03 | 0.386 |
| <i>FLJ23356</i> | <i>Protein kinase-like protein sgk196</i>                                  | 0.45  | 8.7E-03 | 0.386 |
| <i>CLDN20</i>   | <i>Claudin 20</i>                                                          | 0.99  | 8.7E-03 | 0.386 |
| <i>WDR20</i>    | <i>WD repeat domain 20</i>                                                 | 0.43  | 8.7E-03 | 0.386 |
| <i>SLCO5A1</i>  | <i>Solute carrier organic anion transporter family, member 5A1</i>         | -1.07 | 8.8E-03 | 0.386 |
| <i>WDR82</i>    | <i>WD repeat-containing protein 82</i>                                     | -0.32 | 8.8E-03 | 0.386 |
| <i>MAP7D2</i>   | <i>MAP7 domain containing 2</i>                                            | -0.54 | 8.8E-03 | 0.386 |
| <i>FLJ44653</i> | <i>Shadow of prion protein homolog (zebrafish) pseudogene 1</i>            | 0.52  | 8.8E-03 | 0.386 |
| <i>PCDHGB8P</i> | <i>Protocadherin gamma subfamily B, 8 pseudogene</i>                       | 0.99  | 8.8E-03 | 0.386 |
| <i>ITSN1</i>    | <i>Intersectin 1 (SH3 domain protein)</i>                                  | -0.78 | 8.8E-03 | 0.386 |
| <i>COL4A3BP</i> | <i>Collagen, type IV, alpha 3 (Goodpasture antigen) binding protein</i>    | 0.57  | 8.8E-03 | 0.386 |
| <i>DNAL1</i>    | <i>Dynein, axonemal, light chain 1</i>                                     | -0.43 | 8.9E-03 | 0.386 |
| <i>CSN1S1</i>   | <i>Casein alpha s1</i>                                                     | 0.79  | 8.9E-03 | 0.386 |
| <i>ARV1</i>     | <i>ARV1 homolog (S. Cerevisiae)</i>                                        | -0.46 | 8.9E-03 | 0.387 |
| <i>C14orf38</i> | <i>Chromosome 14 open reading frame 38</i>                                 | -0.94 | 8.9E-03 | 0.387 |
| <i>ZNF33A</i>   | <i>Zinc finger protein 33A</i>                                             | -0.45 | 9.0E-03 | 0.387 |
| <i>HNRNPR</i>   | <i>Heterogeneous nuclear ribonucleoprotein R</i>                           | -0.50 | 9.0E-03 | 0.387 |
| <i>EXOSC7</i>   | <i>Exosome component 7</i>                                                 | 0.54  | 9.0E-03 | 0.387 |
| <i>ZDHHC8</i>   | <i>Zinc finger, DHHC-type containing 8</i>                                 | 0.37  | 9.1E-03 | 0.388 |
| <i>SPG11</i>    | <i>Spatacsin</i>                                                           | -0.66 | 9.1E-03 | 0.388 |
| <i>AEBP2</i>    | <i>AE binding protein 2</i>                                                | 0.44  | 9.2E-03 | 0.392 |
| <i>TOP1</i>     | <i>Topoisomerase (DNA) I</i>                                               | -0.60 | 9.2E-03 | 0.392 |
| <i>TXLNA</i>    | <i>Taxilin alpha</i>                                                       | 0.39  | 9.3E-03 | 0.392 |
| <i>FLJ35776</i> | <i>Hypothetical LOC649446</i>                                              | -0.64 | 9.3E-03 | 0.393 |
| <i>GPRC5B</i>   | <i>G protein-coupled receptor, family C, group 5, member B</i>             | 0.49  | 9.3E-03 | 0.393 |
| <i>COX4NB</i>   | <i>COX4 neighbor</i>                                                       | 0.79  | 9.3E-03 | 0.393 |
| <i>BEX1</i>     | <i>Protein BEX1</i>                                                        | -0.41 | 9.4E-03 | 0.393 |
| <i>TNKS2</i>    | <i>Tankyrase, TRF1-interacting ankyrin-related ADP-ribose polymerase 2</i> | -0.40 | 9.4E-03 | 0.393 |
| <i>SURF1</i>    | <i>Surfeit 1</i>                                                           | -0.60 | 9.4E-03 | 0.394 |
| <i>VEGFB</i>    | <i>Vascular endothelial growth factor B</i>                                | -0.52 | 9.5E-03 | 0.394 |
| <i>SPOP</i>     | <i>Speckle-type POZ protein</i>                                            | -0.41 | 9.5E-03 | 0.394 |
| <i>ARFRP1</i>   | <i>ADP-ribosylation factor related protein 1</i>                           | 0.51  | 9.5E-03 | 0.394 |
| <i>LHX2</i>     | <i>LIM homeobox 2</i>                                                      | -0.49 | 9.6E-03 | 0.394 |

|                 |                                                                |       |         |       |
|-----------------|----------------------------------------------------------------|-------|---------|-------|
| <i>ZNF692</i>   | <i>Zinc finger protein 692</i>                                 | 0.56  | 9.6E-03 | 0.394 |
| <i>CCNYL1</i>   | <i>Cyclin Y-like 1</i>                                         | 0.44  | 9.6E-03 | 0.394 |
| <i>POLK</i>     | <i>Polymerase (DNA directed) kappa</i>                         | -0.48 | 9.6E-03 | 0.394 |
| <i>LENG9</i>    | <i>Leukocyte receptor cluster (LRC) member 9</i>               | 0.45  | 9.6E-03 | 0.394 |
| <i>C10orf39</i> | <i>Janus kinase and microtubule interacting protein 3</i>      | 0.54  | 9.6E-03 | 0.394 |
| <i>RBM42</i>    | <i>RNA binding motif protein 42</i>                            | 0.54  | 9.7E-03 | 0.394 |
| <i>TTC35</i>    | <i>Tetratricopeptide repeat domain 35</i>                      | -0.39 | 9.8E-03 | 0.397 |
| <i>TCEAL4</i>   | <i>Transcription elongation factor A (SII)-like 4</i>          | -0.54 | 9.8E-03 | 0.397 |
| <i>DNAJC12</i>  | <i>Dnaj (Hsp40) homolog, subfamily C, member 12</i>            | -0.56 | 9.8E-03 | 0.397 |
| <i>GRIN2B</i>   | <i>Glutamate receptor, ionotropic, N-methyl D-aspartate 2B</i> | 0.48  | 9.8E-03 | 0.397 |
| <i>TTC8</i>     | <i>Tetratricopeptide repeat domain 8</i>                       | -0.44 | 9.9E-03 | 0.398 |
| <i>GJB6</i>     | <i>Gap junction protein, beta 6, 30kda</i>                     | -0.60 | 9.9E-03 | 0.398 |
| <i>LCTL</i>     | <i>Lactase-like</i>                                            | -0.86 | 1.0E-02 | 0.399 |

Table S4. Differentially expressed genes (FDR < 0.2) involved in mitochondrial functions, oxidative phosphorylation, and neurodegenerative diseases in chronic cocaine-addicted individuals.

| Gene Symbol | Gene Name                                                                                   | Log FC | P value | FDR   | GO term or KEGG pathway* |           |           |           |           |
|-------------|---------------------------------------------------------------------------------------------|--------|---------|-------|--------------------------|-----------|-----------|-----------|-----------|
|             |                                                                                             |        |         |       | GO: 0005743              | hsa 00190 | hsa 05016 | hsa 05012 | hsa 05010 |
| ATP5H       | ATP synthase subunit d, mitochondrial                                                       | -0.45  | 3.8E-03 | 0.182 | x                        | x         | x         | x         | x         |
| ATP5O       | ATP synthase, H <sup>+</sup> transporting, mitochondrial F1 complex, O subunit              | -0.61  | 2.3E-04 | 0.046 | x                        | x         | x         | x         | x         |
| CAPN2       | Calpain 2, (m/II) large subunit                                                             | 0.42   | 3.4E-03 | 0.179 |                          |           |           |           | x         |
| CDS2        | CDP-diacylglycerol synthase (phosphatidate cytidyltransferase) 2                            | 0.59   | 6.2E-04 | 0.081 | x                        |           |           |           |           |
| COX5B       | Cytochrome c oxidase subunit Vb                                                             | -0.37  | 3.4E-03 | 0.179 | x                        | x         | x         | x         | x         |
| DNAJC19     | Dnaj (Hsp40) homolog, subfamily C, member 19                                                | -0.74  | 2.5E-04 | 0.050 | x                        |           |           |           |           |
| GRIN2B      | Glutamate receptor, ionotropic, N-methyl D-aspartate 2B                                     | 0.86   | 2.8E-05 | 0.015 |                          |           | x         |           | x         |
| HDAC2       | Histone deacetylase 2                                                                       | -0.75  | 7.7E-04 | 0.094 |                          |           | x         |           |           |
| MCCC1       | Methylcrotonoyl-Coenzyme A carboxylase 1 (alpha)                                            | -1.01  | 1.4E-06 | 0.003 | x                        |           |           |           |           |
| MRPL45      | Mitochondrial ribosomal protein L45                                                         | -0.72  | 1.7E-03 | 0.137 | x                        |           |           |           |           |
| MTCH2       | Mitochondrial carrier homolog 2 (C. Elegans)                                                | -0.50  | 1.0E-03 | 0.106 | x                        |           |           |           |           |
| NDUFA5      | NADH dehydrogenase (ubiquinone) 1 alpha subcomplex, 5, 13kda                                | -0.91  | 3.1E-04 | 0.054 | x                        | x         | x         | x         | x         |
| NDUFAB1     | NADH dehydrogenase (ubiquinone) 1, alpha/beta subcomplex, 1, 8kda                           | -0.86  | 1.1E-03 | 0.106 | x                        | x         | x         | x         | x         |
| NDUFAF1     | NADH dehydrogenase (ubiquinone) 1 alpha subcomplex, assembly factor 1                       | -0.73  | 7.9E-05 | 0.030 | x                        |           |           |           |           |
| NDUFV3      | NADH dehydrogenase (ubiquinone) flavoprotein 3, 10kda                                       | -0.61  | 3.7E-03 | 0.181 | x                        | x         | x         | x         | x         |
| POLR2G      | Polymerase (RNA) II (DNA directed) polypeptide G                                            | -0.65  | 9.0E-04 | 0.101 |                          |           | x         |           |           |
| PPP3CA      | Protein phosphatase 3 (formerly 2B), catalytic subunit, alpha isoform                       | 0.91   | 1.8E-04 | 0.042 |                          |           |           |           | x         |
| SDHA        | Succinate dehydrogenase complex, subunit A, flavoprotein (Fp)                               | -0.49  | 9.9E-04 | 0.103 | x                        | x         | x         | x         | x         |
| SLC25A14    | Solute carrier family 25 (mitochondrial carrier, brain), member 14                          | -0.78  | 2.0E-04 | 0.043 | x                        |           |           |           |           |
| SLC25A20    | Solute carrier family 25 (carnitine/acylcarnitine translocase), member 20                   | -0.53  | 3.5E-03 | 0.180 | x                        |           |           |           |           |
| SLC25A5     | Solute carrier family 25 (mitochondrial carrier; adenine nucleotide translocator), member 5 | -0.69  | 2.2E-03 | 0.153 | x                        |           | x         | x         |           |
| TAF4B       | TAF4b RNA polymerase II, TATA box binding protein (TBP)-associated factor, 105kda           | -0.72  | 2.0E-03 | 0.146 |                          |           | x         |           |           |
| TIMM23      | Translocase of inner mitochondrial membrane 23 homolog (yeast)                              | -0.65  | 3.7E-03 | 0.181 | x                        |           |           |           |           |
| UQCRH       | Ubiquinol-cytochrome c reductase hinge protein                                              | -0.74  | 1.1E-04 | 0.035 | x                        | x         | x         | x         | x         |

\* GO:0005743, Mitochondrial inner membrane; hsa00190, Oxidative phosphorylation; hsa05016, Huntington's disease; hsa05010, Alzheimer's disease; hsa05012, Parkinson's disease.

Table S5. Expression changes of the genes involved in the mitochondrial oxidative phosphorylation reaction in chronic cocaine addicts

| Gene Symbol | Gene Name                                                                            | Cocaine |         | Alcohol |         |
|-------------|--------------------------------------------------------------------------------------|---------|---------|---------|---------|
|             |                                                                                      | logFC   | P value | logFC   | P value |
| NDUFAF1     | NADH dehydrogenase (ubiquinone) 1 alpha subcomplex, assembly factor 1, mitochondrial | -0.734  | 0.00008 | 0.032   | 0.84481 |
| UQCRH       | Cytochrome b-c1 complex subunit 6, mitochondrial                                     | -0.742  | 0.00011 | -0.234  | 0.17260 |
| ATP5O       | ATP synthase subunit O, mitochondrial                                                | -0.613  | 0.00023 | -0.230  | 0.12739 |
| NDUFA5      | NADH dehydrogenase [ubiquinone] 1 alpha subcomplex subunit 5                         | -0.914  | 0.00031 | -0.485  | 0.03899 |
| SDHA        | Succinate dehydrogenase [ubiquinone] flavoprotein subunit, mitochondrial             | -0.486  | 0.00099 | 0.102   | 0.45036 |
| NDUFAB1     | NADH dehydrogenase (ubiquinone) 1, alpha/beta subcomplex, 1, mitochondrial           | -0.861  | 0.00110 | -0.432  | 0.08012 |
| COX5B       | Cytochrome c oxidase subunit 5B, mitochondrial                                       | -0.367  | 0.00343 | 0.011   | 0.92324 |
| NDUFV3      | NADH dehydrogenase [ubiquinone] flavoprotein 3, mitochondrial                        | -0.615  | 0.00369 | -0.108  | 0.58458 |
| ATP5H       | ATP synthase subunit d, mitochondrial                                                | -0.450  | 0.00381 | -0.282  | 0.05834 |
| NDUFA12L    | NADH dehydrogenase (ubiquinone) 1 alpha subcomplex, assembly factor 2 [              | -0.527  | 0.00748 | -0.231  | 0.21881 |
| NDUFB10     | NADH dehydrogenase [ubiquinone] 1 beta subcomplex subunit 10                         | -0.427  | 0.00799 | -0.074  | 0.62841 |
| NDUFS2      | NADH dehydrogenase [ubiquinone] iron-sulfur protein 2, mitochondrial                 | -0.486  | 0.00875 | 0.029   | 0.87019 |
| NDUFA1      | NADH dehydrogenase [ubiquinone] 1 alpha subcomplex subunit 1                         | -0.409  | 0.00875 | -0.021  | 0.88639 |
| UQCRQ       | Cytochrome b-c1 complex subunit 8                                                    | -0.527  | 0.01076 | -0.056  | 0.77296 |
| ATP5I       | ATP synthase subunit e, mitochondrial                                                | -0.325  | 0.01145 | -0.155  | 0.20842 |
| COX6BP1     | Cytochrome c oxidase subunit 6B1, pseudogene1                                        | -1.146  | 0.01203 | 0.156   | 0.71863 |
| NDUFS4      | NADH dehydrogenase [ubiquinone] iron-sulfur protein 4, mitochondrial                 | -0.528  | 0.01602 | 0.186   | 0.37632 |
| UQCRB       | Cytochrome b-c1 complex subunit 7                                                    | -0.438  | 0.01746 | -0.218  | 0.21979 |
| COX7A2      | Cytochrome c oxidase polypeptide 7A2, mitochondrial                                  | -0.524  | 0.01947 | -0.286  | 0.18780 |
| COX4I2      | Cytochrome c oxidase subunit 4 isoform 2, mitochondrial                              | -0.859  | 0.02164 | -0.162  | 0.65141 |
| SDHB        | Succinate dehydrogenase [ubiquinone] iron-sulfur subunit, mitochondrial              | -0.415  | 0.02876 | 0.069   | 0.70548 |
| COX6C       | Cytochrome c oxidase subunit 6C                                                      | -0.379  | 0.02942 | -0.123  | 0.46575 |
| NDUFB3      | NADH dehydrogenase [ubiquinone] 1 beta subcomplex subunit 3                          | -0.529  | 0.03035 | -0.156  | 0.50824 |

|          |                                                                                   |        |         |        |         |
|----------|-----------------------------------------------------------------------------------|--------|---------|--------|---------|
| COX7B    | Cytochrome c oxidase subunit 7B,<br>mitochondrial                                 | -0.444 | 0.03676 | -0.008 | 0.96800 |
| NDUFB6   | NADH dehydrogenase [ubiquinone] 1 beta<br>subcomplex subunit 6                    | -0.507 | 0.03719 | 0.201  | 0.39364 |
| NDUFB9   | NADH dehydrogenase [ubiquinone] 1 beta<br>subcomplex subunit 9                    | -0.351 | 0.03753 | -0.007 | 0.96703 |
| COX7A2L  | Cytochrome c oxidase subunit 7A-related<br>protein, mitochondrial                 | -0.326 | 0.03817 | -0.148 | 0.33448 |
| COX17    | Cytochrome c oxidase copper chaperone                                             | -0.540 | 0.03996 | 0.303  | 0.23756 |
| ATP5E    | ATP synthase subunit epsilon, mitochondrial                                       | -0.397 | 0.04095 | -0.423 | 0.03004 |
| ATP5G1   | ATP synthase lipid-binding protein,<br>mitochondrial                              | -0.497 | 0.04331 | -0.091 | 0.70086 |
| NDUFB8   | NADH dehydrogenase [ubiquinone] 1 beta<br>subcomplex subunit 8, mitochondrial     | -0.348 | 0.04916 | 0.236  | 0.17506 |
| NDUFB4   | NADH dehydrogenase [ubiquinone] 1 beta<br>subcomplex subunit 4                    | -0.334 | 0.59756 | 0.135  | 0.83018 |
| NDUFA4   | NADH dehydrogenase [ubiquinone] 1 alpha<br>subcomplex subunit 4                   | -0.411 | 0.05376 | -0.046 | 0.82565 |
| ATP5S    | ATP synthase subunit s, mitochondrial                                             | -0.086 | 0.64662 | -0.062 | 0.74082 |
| COX7C    | Cytochrome c oxidase subunit 7C,<br>mitochondrial                                 | -0.322 | 0.05604 | -0.109 | 0.50721 |
| NDUFA8   | NADH dehydrogenase [ubiquinone] 1 alpha<br>subcomplex subunit 8                   | -0.073 | 0.76353 | 0.659  | 0.01035 |
| SDHD     | Succinate dehydrogenase [ubiquinone]<br>cytochrome b small subunit, mitochondrial | -0.402 | 0.08343 | -0.499 | 0.03399 |
| UQCR     | Cytochrome b-c1 complex subunit 10                                                | 0.133  | 0.47290 | 0.343  | 0.07036 |
| NDUFS7   | NADH dehydrogenase [ubiquinone] iron-sulfur<br>protein 7, mitochondrial           | 0.108  | 0.60445 | 0.368  | 0.08356 |
| NDUFC2   | NADH dehydrogenase [ubiquinone] 1 subunit<br>C2                                   | -0.350 | 0.09253 | 0.351  | 0.09180 |
| NDUFA4L2 | NADH dehydrogenase (ubiquinone) 1 alpha<br>subcomplex, 4-like 2                   | 0.120  | 0.54278 | -0.306 | 0.12676 |
| COX5A    | Cytochrome c oxidase subunit 5A,<br>mitochondrial                                 | -0.552 | 0.05723 | 0.410  | 0.15239 |
| COX4I1   | Cytochrome c oxidase subunit 4 isoform 1,<br>mitochondrial                        | -0.239 | 0.07837 | 0.187  | 0.16402 |
| NDUFS6   | NADH dehydrogenase [ubiquinone] iron-sulfur<br>protein 6, mitochondrial           | 0.222  | 0.13387 | 0.205  | 0.16431 |
| COX15    | Cytochrome c oxidase assembly protein<br>COX15 homolog                            | 0.092  | 0.55530 | 0.217  | 0.16845 |
| NDUFA11  | NADH dehydrogenase [ubiquinone] 1 alpha<br>subcomplex subunit 11                  | 0.053  | 0.75122 | 0.230  | 0.17573 |
| NDUFV1   | NADH dehydrogenase [ubiquinone]<br>flavoprotein 1, mitochondrial                  | 0.053  | 0.70520 | 0.189  | 0.18413 |
| NDUFS3   | NADH dehydrogenase [ubiquinone] iron-sulfur<br>protein 3, mitochondrial           | -0.304 | 0.06326 | -0.214 | 0.18527 |

|         |                                                                                |        |         |        |         |
|---------|--------------------------------------------------------------------------------|--------|---------|--------|---------|
| ATP5F1  | ATP synthase subunit b, mitochondrial                                          | -0.498 | 0.05545 | -0.315 | 0.21711 |
| COX19   | Cytochrome c oxidase assembly protein<br>COX19                                 | 0.057  | 0.69185 | 0.176  | 0.22449 |
| COX7A1  | Cytochrome c oxidase polypeptide 7A1,<br>mitochondrial                         | -0.442 | 0.17380 | 0.393  | 0.22510 |
| NDUFA13 | NADH dehydrogenase [ubiquinone] 1 alpha<br>subcomplex subunit 13               | -0.071 | 0.52582 | 0.128  | 0.25357 |
| COX6A2  | Cytochrome c oxidase subunit 6A2,<br>mitochondrial                             | -0.056 | 0.88862 | -0.452 | 0.25955 |
| COX8A   | Cytochrome c oxidase subunit 8A,<br>mitochondrial                              | -0.014 | 0.93629 | 0.202  | 0.26281 |
| NDUFC1  | NADH dehydrogenase [ubiquinone] 1 subunit<br>C1, mitochondrial                 | -0.421 | 0.05932 | 0.236  | 0.28095 |
| ATP5G2  | ATP synthase lipid-binding protein,<br>mitochondrial                           | -0.024 | 0.85861 | 0.141  | 0.29549 |
| COX6A1  | Cytochrome c oxidase subunit 6A1,<br>mitochondrial                             | -0.174 | 0.25373 | -0.159 | 0.29606 |
| NDUFA2  | NADH dehydrogenase [ubiquinone] 1 alpha<br>subcomplex subunit 2                | -0.317 | 0.07220 | 0.177  | 0.30590 |
| NDUFA7  | NADH dehydrogenase [ubiquinone] 1 alpha<br>subcomplex subunit 7                | 0.174  | 0.47200 | 0.233  | 0.33700 |
| NDUFB7  | NADH dehydrogenase [ubiquinone] 1 beta<br>subcomplex subunit 7                 | 0.234  | 0.12842 | 0.129  | 0.39464 |
| COX18   | Cytochrome c oxidase assembly protein<br>COX18                                 | -0.197 | 0.25036 | -0.143 | 0.40109 |
| NDUFA9  | NADH dehydrogenase [ubiquinone] 1 alpha<br>subcomplex subunit 9, mitochondrial | -0.240 | 0.16040 | 0.140  | 0.40700 |
| NDUFA12 | NADH dehydrogenase [ubiquinone] 1 alpha<br>subcomplex subunit 12               | -0.310 | 0.09756 | -0.152 | 0.40792 |
| ATP5G3  | ATP synthase lipid-binding protein,<br>mitochondrial                           | -0.324 | 0.33079 | 0.272  | 0.41279 |
| COX6B1  | Cytochrome c oxidase subunit 6B1                                               | -0.181 | 0.20445 | -0.108 | 0.44441 |
| ATP5J2  | ATP synthase subunit f, mitochondrial                                          | -0.219 | 0.38826 | 0.185  | 0.46534 |
| NDUFB5  | NADH dehydrogenase [ubiquinone] 1 beta<br>subcomplex subunit 5, mitochondrial  | -0.302 | 0.29420 | -0.200 | 0.48395 |
| UQCRC1  | Cytochrome b-c1 complex subunit 1,<br>mitochondrial                            | 0.075  | 0.67149 | 0.118  | 0.50171 |
| ATP5J   | ATP synthase-coupling factor 6, mitochondrial                                  | -0.253 | 0.22833 | -0.119 | 0.56810 |
| NDUFS8  | NADH dehydrogenase [ubiquinone] iron-sulfur<br>protein 8, mitochondrial        | 0.185  | 0.23248 | 0.086  | 0.57723 |
| COX11P  | Cytochrome c oxidase assembly protein<br>COX11, pseudogene                     | -0.475 | 0.23354 | 0.217  | 0.58333 |
| NDUFV2  | NADH dehydrogenase [ubiquinone]<br>flavoprotein 2, mitochondrial               | -0.293 | 0.20037 | 0.118  | 0.60126 |
| UQCRC2  | Cytochrome b-c1 complex subunit 2,<br>mitochondrial                            | -0.422 | 0.09911 | 0.126  | 0.61598 |

|         |                                                                              |        |         |        |         |
|---------|------------------------------------------------------------------------------|--------|---------|--------|---------|
| ATP5D   | ATP synthase subunit delta, mitochondrial                                    | -0.059 | 0.70701 | 0.073  | 0.64322 |
| ATP5C1  | ATP synthase subunit gamma, mitochondrial                                    | -0.478 | 0.06127 | -0.109 | 0.65986 |
| NDUFB1  | NADH dehydrogenase [ubiquinone] 1 beta subcomplex subunit 1                  | -0.411 | 0.13060 | -0.106 | 0.69090 |
| ATP5A1  | ATP synthase subunit alpha, mitochondrial                                    | -0.390 | 0.13379 | 0.094  | 0.71249 |
| ATP5SL  | ATP5S-like                                                                   | -0.150 | 0.34837 | 0.054  | 0.73529 |
| NDUFA3  | NADH dehydrogenase [ubiquinone] 1 alpha subcomplex subunit 3                 | 0.049  | 0.77049 | 0.055  | 0.74359 |
| SDHC    | Succinate dehydrogenase cytochrome b560 subunit, mitochondrial               | 0.072  | 0.63033 | 0.044  | 0.76889 |
| NDUFA6  | NADH dehydrogenase [ubiquinone] 1 alpha subcomplex subunit 6                 | -0.187 | 0.31972 | 0.047  | 0.80213 |
| NDUFB2  | NADH dehydrogenase [ubiquinone] 1 beta subcomplex subunit 2, mitochondrial   | -0.334 | 0.07081 | 0.037  | 0.83874 |
| NDUFS5  | NADH dehydrogenase [ubiquinone] iron-sulfur protein 5, mitochondrial         | -0.356 | 0.06243 | -0.032 | 0.86336 |
| NDUFB11 | NADH dehydrogenase [ubiquinone] 1 beta subcomplex subunit 11, mitochondrial  | -0.117 | 0.55453 | 0.026  | 0.89525 |
| ATP5B   | ATP synthase subunit beta, mitochondrial                                     | -0.400 | 0.11475 | -0.032 | 0.89828 |
| COX11   | Cytochrome c oxidase assembly protein COX11, mitochondrial                   | 0.006  | 0.97229 | 0.019  | 0.91077 |
| NDUFA10 | NADH dehydrogenase [ubiquinone] 1 alpha subcomplex subunit 10, mitochondrial | -0.220 | 0.29296 | -0.019 | 0.92558 |
| ATP5L   | ATP synthase subunit g, mitochondrial                                        | 0.006  | 0.96350 | 0.012  | 0.93201 |
| NDUFS1  | NADH dehydrogenase [ubiquinone] iron-sulfur protein 1, mitochondrial         | 0.103  | 0.56139 | -0.008 | 0.96187 |
| UQCRCF1 | Cytochrome b-c1 complex subunit Rieske, mitochondrial                        | -0.629 | 0.09330 | 0.002  | 0.99628 |



Table S6. Differentially expressed genes (FDR < 0.2) involved in negative regulation of gene expression, gene silencing, and covalent chromatin modification in chronic cocaine- and alcohol- addicted individuals

| Gene Symbol | Gene Name                                                           | Cocaine |         |       | Alcohol |         |       | Gene Ontology Term* |             |             |
|-------------|---------------------------------------------------------------------|---------|---------|-------|---------|---------|-------|---------------------|-------------|-------------|
|             |                                                                     | Log FC  | P value | FDR   | Log FC  | P value | FDR   | GO: 0010629         | GO: 0016458 | GO: 0016569 |
| MDM4        | Mdm4 p53 binding protein homolog (mouse)                            | 1.01    | 3.0E-06 | 0.004 | 0.54    | 4.7E-03 | 0.360 | x                   |             |             |
| LRCH4       | Leucine-rich repeats and calponin homology (CH) domain containing 4 | 0.80    | 8.8E-06 | 0.008 | 0.65    | 1.5E-04 | 0.112 | x                   |             |             |
| ZGPAT       | Zinc finger, CCCH-type with G patch domain                          | 0.55    | 9.2E-05 | 0.033 | 0.51    | 2.7E-04 | 0.141 | x                   |             |             |
| PBXIP1      | Pre-B-cell leukemia homeobox interacting protein 1                  | 0.91    | 1.2E-04 | 0.035 | -0.13   | 5.3E-01 | 0.917 | x                   |             |             |
| MTA2        | Metastasis associated 1 family, member 2                            | 0.78    | 1.4E-04 | 0.038 | 0.15    | 4.1E-01 | 0.884 | x                   |             |             |
| ARID5B      | AT rich interactive domain 5B (MRF1-like)                           | 0.72    | 4.2E-04 | 0.067 | 0.15    | 4.1E-01 | 0.882 | x                   |             |             |
| SUMO1P3     | SUMO1 pseudogene 3                                                  | -0.84   | 4.6E-04 | 0.069 | -0.58   | 1.1E-02 | 0.424 | x                   |             |             |
| HDAC2       | Histone deacetylase 2                                               | -0.75   | 7.7E-04 | 0.094 | -0.58   | 7.1E-03 | 0.382 | x                   | x           | x           |
| SLA2        | Src-like-adaptor 2                                                  | 1.25    | 9.0E-04 | 0.101 | 0.59    | 9.1E-02 | 0.673 | x                   |             |             |
| ZBTB16      | Zinc finger and BTB domain containing 16                            | 0.57    | 1.4E-03 | 0.121 | 0.19    | 2.4E-01 | 0.815 | x                   |             |             |
| MDM2        | Mdm2 p53 binding protein homolog (mouse)                            | 0.51    | 1.6E-03 | 0.132 | 0.51    | 1.5E-03 | 0.259 | x                   |             |             |
| RNASEN      | Ribonuclease type III, nuclear                                      | -0.57   | 1.7E-03 | 0.138 | -0.39   | 2.5E-02 | 0.524 | x                   | x           |             |
| LEF1        | Lymphoid enhancer-binding factor 1                                  | 0.69    | 1.8E-03 | 0.139 | 0.30    | 1.5E-01 | 0.755 | x                   |             |             |
| RNF8        | E3 ubiquitin-protein ligase RNF8                                    | -0.43   | 2.0E-03 | 0.146 | 0.01    | 9.3E-01 | 1.000 |                     |             | x           |
| L3MBTL      | L(3)mbt-like (Drosophila)                                           | 0.46    | 2.3E-03 | 0.153 | 0.45    | 2.7E-03 | 0.323 | x                   |             |             |
| ATF7IP      | Activating transcription factor 7 interacting protein               | 0.47    | 2.3E-03 | 0.154 | 0.23    | 1.1E-01 | 0.702 | x                   |             |             |
| SBNO2       | Strawberry notch homolog 2 (Drosophila)                             | 0.66    | 2.7E-03 | 0.166 | 0.38    | 6.4E-02 | 0.616 | x                   |             |             |
| BMP4        | Bone morphogenetic protein 4                                        | 1.22    | 2.7E-03 | 0.168 | 0.49    | 2.0E-01 | 0.790 | x                   |             |             |
| TNRC6C      | Trinucleotide repeat containing 6C                                  | 0.59    | 2.8E-03 | 0.170 | 0.69    | 6.5E-04 | 0.190 | x                   | x           |             |
| DNMT3A      | DNA (cytosine-5-)-methyltransferase 3 alpha                         | 0.73    | 2.8E-03 | 0.171 | 0.30    | 1.9E-01 | 0.786 | x                   | x           | x           |
| PHF16       | PHD finger protein 16                                               | -0.45   | 2.9E-03 | 0.172 | 0.00    | 9.7E-01 | 1.000 |                     |             | x           |
| SCGB1A1     | Secretoglobin, family 1A, member 1 (uteroglobin)                    | 0.81    | 3.2E-03 | 0.178 | -0.20   | 4.4E-01 | 0.893 | x                   |             |             |
| MBD3        | Methyl-CpG-binding domain protein 3                                 | 0.51    | 3.6E-03 | 0.180 | 0.55    | 2.0E-03 | 0.304 | x                   | x           | x           |
| EYA1        | Eyes absent homolog 1                                               | 0.46    | 3.6E-03 | 0.180 | -0.08   | 5.8E-01 | 0.925 |                     |             | x           |
| ACTL6A      | Actin-like protein 6A                                               | -0.48   | 3.9E-03 | 0.184 | -0.34   | 3.5E-02 | 0.546 |                     |             | x           |
| TADA1L      | Transcriptional adapter 1-like protein                              | -0.60   | 4.0E-03 | 0.184 | 0.18    | 3.6E-01 | 0.862 |                     |             | x           |
| EIF2C1      | Eukaryotic translation initiation factor 2C, 1                      | 0.51    | 4.0E-03 | 0.184 | 0.38    | 2.8E-02 | 0.532 | x                   | x           |             |

\* GO:0010629, negative regulation of gene expression; GO:0016458, gene silencing; GO:0016569, covalent chromatin modification

Table S7. Differentially expressed RNA-binding genes (FDR < 0.2)

| Gene Symbol     | Gene Name                                                  | Log FC | Cocaine |        |        | Alcohol |        |  |
|-----------------|------------------------------------------------------------|--------|---------|--------|--------|---------|--------|--|
|                 |                                                            |        | P value | FDR    | Log FC | P value | FDR    |  |
| DDX17           | Probable ATP-dependent RNA helicase DDX17                  | 1.02   | 1.4E-08 | 0.0001 | 0.49   | 9.1E-04 | 0.2321 |  |
| PAPD1           | Mitochondrial poly(A) polymerase                           | 0.95   | 4.1E-06 | 0.0045 | 1.17   | 1.1E-07 | 0.0011 |  |
| MRPS17          | 28S ribosomal protein S17, mitochondrial                   | -0.80  | 8.5E-06 | 0.0079 | -0.17  | 2.8E-01 | 0.8292 |  |
| HNRPH1          | Heterogeneous nuclear ribonucleoprotein H1                 | 0.81   | 6.5E-05 | 0.0259 | 0.72   | 2.7E-04 | 0.1414 |  |
| HNRNPU          | Heterogeneous nuclear ribonucleoprotein U                  | 0.70   | 2.9E-04 | 0.0525 | 0.35   | 5.1E-02 | 0.5894 |  |
| NUFIP2          | Nuclear fragile X mental retardation-interacting protein 2 | 0.72   | 8.5E-04 | 0.0992 | 0.18   | 3.7E-01 | 0.8678 |  |
| POLR2G          | DNA-directed RNA polymerase II subunit RPB7                | -0.65  | 9.0E-04 | 0.1009 | -0.09  | 6.3E-01 | 0.9293 |  |
| SFRS6           | Splicing factor, arginine/serine-rich 6                    | 0.67   | 1.0E-03 | 0.1036 | 0.58   | 4.0E-03 | 0.3518 |  |
| TARBP1          | Probable methyltransferase TARBP1                          | -0.70  | 1.3E-03 | 0.1152 | -0.10  | 6.0E-01 | 0.9263 |  |
| DHX34           | Probable ATP-dependent RNA helicase DHX34                  | 0.53   | 1.4E-03 | 0.1210 | 0.46   | 4.5E-03 | 0.3536 |  |
| MSI1            | RNA-binding protein Musashi homolog 1                      | 0.60   | 1.7E-03 | 0.1366 | 0.21   | 2.4E-01 | 0.8157 |  |
| RNASEN          | Ribonuclease 3                                             | -0.57  | 1.7E-03 | 0.1383 | -0.39  | 2.5E-02 | 0.5237 |  |
| ZMAT3           | Zinc finger matrin-type protein 3                          | 0.62   | 2.6E-03 | 0.1633 | 0.53   | 8.6E-03 | 0.3855 |  |
| TNRC6C          | Trinucleotide repeat-containing gene 6C protein            | 0.59   | 2.8E-03 | 0.1699 | 0.69   | 6.5E-04 | 0.1898 |  |
| LARP4           | La ribonucleoprotein domain family, member 4               | 0.55   | 3.6E-03 | 0.1803 | 0.29   | 1.1E-01 | 0.6999 |  |
| EIF2C1          | Protein argonaute-1                                        | 0.51   | 4.0E-03 | 0.1841 | 0.38   | 2.8E-02 | 0.5320 |  |
| ANKHD1-EIF4EBP3 | ANKHD1-EIF4EBP3 readthrough                                | 0.97   | 4.2E-03 | 0.1890 | 0.49   | 1.2E-01 | 0.7145 |  |
| FXR1            | Fragile X mental retardation syndrome-related protein 1    | 0.52   | 4.8E-03 | 0.1957 | 0.34   | 5.4E-02 | 0.5984 |  |
| CNOT6           | CCR4-NOT transcription complex subunit 6                   | 0.54   | 7.8E-03 | 0.2263 | 0.74   | 5.1E-04 | 0.1758 |  |
| RBM34           | RNA-binding protein 34                                     | -0.23  | 2.4E-01 | 0.6598 | -0.75  | 6.4E-04 | 0.1898 |  |

Table S8. Differentially expressed snoRNA genes (FDR < 0.2) in chronic cocaine and alcohol addicted individuals

| Gene Symbol | Gene Name                           | Cocaine |         |        | Alcohol |         |        |
|-------------|-------------------------------------|---------|---------|--------|---------|---------|--------|
|             |                                     | Log FC  | P value | FDR    | Log FC  | P value | FDR    |
| SNORD89     | small nucleolar RNA, C/D box 89     | 1.53    | 5.6E-08 | 0.0002 | 1.30    | 1.1E-06 | 0.0036 |
| SNORA73A    | small nucleolar RNA, H/ACA box 73A  | 1.41    | 2.2E-07 | 0.0006 | 0.81    | 6.5E-04 | 0.1898 |
| SNORD42A    | small nucleolar RNA, C/D box 42A    | -1.47   | 1.2E-05 | 0.0097 | -1.48   | 1.1E-05 | 0.0176 |
| SNORA47     | small nucleolar RNA, H/ACA box 47   | 1.82    | 1.5E-05 | 0.0101 | 1.48    | 2.3E-04 | 0.1397 |
| SNORA39     | small nucleolar RNA, H/ACA box 39   | 1.67    | 2.7E-05 | 0.0153 | 0.66    | 6.0E-02 | 0.6092 |
| SNORA74B    | small nucleolar RNA, H/ACA box 74B  | 1.60    | 1.2E-04 | 0.0354 | 0.35    | 3.4E-01 | 0.8548 |
| SNORA62     | small nucleolar RNA, H/ACA box 62   | 1.87    | 1.3E-04 | 0.0376 | 0.41    | 3.4E-01 | 0.8556 |
| SNORD76     | small nucleolar RNA, C/D box 76     | 1.21    | 1.6E-04 | 0.0421 | 0.61    | 3.8E-02 | 0.5556 |
| SNORD33     | small nucleolar RNA, C/D box 33     | 0.74    | 1.8E-04 | 0.0421 | 0.24    | 1.8E-01 | 0.7801 |
| SNORD74     | small nucleolar RNA, C/D box 74     | 1.37    | 2.1E-04 | 0.0441 | 0.91    | 8.4E-03 | 0.3855 |
| SNORD116-29 | small nucleolar RNA, C/D box 116-29 | -1.68   | 3.0E-04 | 0.0534 | -1.82   | 1.2E-04 | 0.1029 |
| SNORD22     | small nucleolar RNA, C/D box 22     | 1.17    | 6.1E-04 | 0.0813 | 0.28    | 3.7E-01 | 0.8662 |
| SNORD4A     | small nucleolar RNA, C/D box 4A     | -1.31   | 1.6E-03 | 0.1331 | -0.72   | 6.7E-02 | 0.6239 |
| SNORD59B    | small nucleolar RNA, C/D box 59B    | 1.51    | 3.4E-03 | 0.1790 | 1.27    | 1.2E-02 | 0.4309 |
| SNORD83B    | small nucleolar RNA, C/D box 83B    | 0.88    | 3.8E-03 | 0.1818 | -0.18   | 5.3E-01 | 0.9183 |

Table S9. Differentially expressed gene (FDR < 0.2) in the extra-cellular matrix part in chronic cocaine addicted individuals

| <b>Gene Symbol</b> | <b>Gene name</b>                                        | <b>Log FC</b> | <b>P value</b> | <b>FDR</b> |
|--------------------|---------------------------------------------------------|---------------|----------------|------------|
| COL4A1             | Collagen, type IV, alpha 1                              | 0.68          | 3.9E-03        | 0.184      |
| COL10A1            | Collagen, type X, alpha 1                               | 0.85          | 4.5E-03        | 0.192      |
| GRIN2B             | Glutamate receptor, ionotropic, N-methyl D-aspartate 2B | 0.86          | 2.8E-05        | 0.015      |
| HSPG2              | Heparan sulfate proteoglycan 2                          | 0.67          | 7.5E-04        | 0.091      |
| LAMA5              | Laminin, alpha 5                                        | 0.54          | 1.7E-03        | 0.138      |
| MFAP4              | Microfibrillar-associated protein 4                     | 0.65          | 4.3E-03        | 0.189      |
| TIMP2              | Metalloproteinase inhibitor 2                           | -0.63         | 2.1E-03        | 0.147      |

Table S10. Expression of Brain expressed, X-linked genes

| <b>Gene<br/>Symbol</b> | <b>Gene Name</b>            | <b>Cocaine</b>    |                |            | <b>Alcohol</b>    |                |            |
|------------------------|-----------------------------|-------------------|----------------|------------|-------------------|----------------|------------|
|                        |                             | <b>Log<br/>FC</b> | <b>P value</b> | <b>FDR</b> | <b>Log<br/>FC</b> | <b>P value</b> | <b>FDR</b> |
| BEX1                   | Brain expressed, X-linked 1 | -0.66             | 1.1E-04        | 0.035      | -0.41             | 9.4E-03        | 0.393      |
| BEX2                   | Brain expressed, X-linked 2 | -0.63             | 4.5E-02        | 0.385      | 0.02              | 9.5E-01        | 1.000      |
| BEX3                   | Brain expressed, X-linked 3 | -0.45             | 7.1E-03        | 0.220      | -0.10             | 5.3E-01        | 0.919      |
| (NGFRAP1)              |                             |                   |                |            |                   |                |            |
| BEX4                   | Brain expressed, X-linked 4 | -0.58             | 2.8E-05        | 0.015      | -0.13             | 2.8E-01        | 0.833      |
| BEX5                   | Brain expressed, X-linked 5 | -0.50             | 6.2E-03        | 0.213      | -0.41             | 2.2E-02        | 0.515      |

Table S11. Expression changes of the genes involved in the long-term potentiation in chronic cocaine addicted individuals

| <b>Gene Symbol</b> | <b>Gene Name</b>                                                        | <b>Log FC</b> | <b>P value</b> | <b>FDR</b> |
|--------------------|-------------------------------------------------------------------------|---------------|----------------|------------|
| GRIN2B             | Glutamate [NMDA] receptor subunit epsilon-2                             | 0.860         | 0.00003        | 0.015      |
| PPP3CA             | Serine/threonine-protein phosphatase 2B catalytic subunit alpha isoform | 0.912         | 0.00018        | 0.042      |
| CAMK2D             | Calcium/calmodulin-dependent protein kinase type II delta chain         | -0.723        | 0.00023        | 0.047      |
| PPP1CB             | Serine/threonine-protein phosphatase PP1-beta catalytic subunit         | 0.747         | 0.00105        | 0.106      |
| CALM2              | Calmodulin 2                                                            | -0.765        | 0.01247        | 0.264      |
| CREB1              | Cyclic AMP-responsive element-binding protein 1                         | 0.436         | 0.01257        | 0.710      |
| ADCY1              | Adenylate cyclase type 1                                                | -0.434        | 0.01789        | 0.300      |
| PPP1CC             | Serine/threonine-protein phosphatase PP1-gamma catalytic subunit        | 0.511         | 0.02717        | 0.336      |
| PRKCB1             | protein kinase C, beta                                                  | 0.550         | 0.02778        | 0.337      |
| NRAS               | neuroblastoma RAS viral (v-ras) oncogene homolog                        | 0.412         | 0.04238        | 0.378      |

Table S12. Histone H3K4me3 changes (FDR < 0.2) at the promoters of expressed genes in chronic cocaine addicted individuals.

| Gene Symbol | Gene Name                                                     | H3K4me3 |         |       | Gene Expression |         |          |
|-------------|---------------------------------------------------------------|---------|---------|-------|-----------------|---------|----------|
|             |                                                               | Log FC  | P value | FDR   | Log FC          | P value | FDR      |
| NFASC       | Neurofascin homolog (chicken)                                 | -0.70   | 3.0E-05 | 0.040 | 0.04            | 7.5E-01 | 0.937    |
| MOG         | Myelin oligodendrocyte glycoprotein                           | -0.75   | 3.5E-05 | 0.041 | -0.26           | 6.5E-01 | 0.895    |
| CNP         | 2',3'-cyclic nucleotide 3' phosphodiesterase                  | -0.54   | 4.2E-05 | 0.041 | 0.45            | 3.9E-02 | 0.368 *  |
| BAHCC1      | BAH domain and coiled-coil containing 1                       | 0.47    | 4.2E-05 | 0.041 | 0.22            | 1.5E-01 | 0.562    |
| BCL2L11     | BCL2-like 11 (apoptosis facilitator)                          | 0.46    | 8.4E-05 | 0.054 | 0.00            | 9.7E-01 | 1.000    |
| MYLK        | Myosin light chain kinase                                     | 0.92    | 1.3E-04 | 0.062 | 0.25            | 2.7E-01 | 0.682    |
| NUDT5       | Nudix (nucleoside diphosphate linked moiety X)-type motif 5   | -0.57   | 1.4E-04 | 0.062 | 0.09            | 6.2E-01 | 0.878    |
| CDC123      | Cell division cycle 123 homolog (S. Cerevisiae)               | -0.57   | 1.4E-04 | 0.062 | -0.48           | 1.9E-02 | 0.305 *  |
| SCD         | Stearoyl-coa desaturase (delta-9-desaturase)                  | -0.46   | 1.7E-04 | 0.062 | -0.38           | 7.3E-02 | 0.450    |
| LAPTM5      | Lysosomal protein transmembrane 5                             | -0.88   | 1.8E-04 | 0.062 | -0.37           | 3.5E-01 | 0.737    |
| GPD1        | Glycerol-3-phosphate dehydrogenase 1 (soluble)                | -0.87   | 1.8E-04 | 0.062 | -0.45           | 3.7E-02 | 0.365 *  |
| MAST3       | Microtubule associated serine/threonine kinase 3              | -0.61   | 2.2E-04 | 0.070 | 0.12            | 5.7E-01 | 0.862    |
| MAG         | Myelin associated glycoprotein                                | -0.72   | 2.3E-04 | 0.071 | -0.25           | 3.0E-01 | 0.701    |
| CMTM5       | CKLF-like MARVEL transmembrane domain containing 5            | -0.83   | 2.3E-04 | 0.071 | -0.06           | 7.8E-01 | 0.944    |
| FZD8        | Frizzled homolog 8 (Drosophila)                               | 0.40    | 2.6E-04 | 0.077 | 0.00            | 9.9E-01 | 1.000    |
| ACP2        | Acid phosphatase 2, lysosomal                                 | -0.54   | 2.9E-04 | 0.078 | -0.55           | 3.9E-03 | 0.184 ** |
| PPYR1       | Pancreatic polypeptide receptor 1                             | -0.92   | 4.4E-04 | 0.098 | 0.01            | 9.7E-01 | 1.000    |
| PLP1        | Proteolipid protein 1                                         | -0.72   | 4.6E-04 | 0.098 | -0.29           | 2.1E-01 | 0.630    |
| DDR1        | Discoidin domain receptor tyrosine kinase 1                   | -0.44   | 4.6E-04 | 0.098 | 0.15            | 8.3E-01 | 0.965    |
| SLC30A1     | Solute carrier family 30 (zinc transporter), member 1         | 0.33    | 4.7E-04 | 0.098 | 0.22            | 3.2E-01 | 0.721    |
| KCNJ10      | Potassium inwardly-rectifying channel, subfamily J, member 10 | -0.62   | 4.8E-04 | 0.098 | -0.34           | 1.1E-01 | 0.505    |
| ATM         | Ataxia telangiectasia mutated                                 | -0.49   | 4.8E-04 | 0.098 | 0.08            | 6.8E-01 | 0.908    |
| NPAT        | Nuclear protein, ataxia-telangiectasia locus                  | -0.49   | 4.8E-04 | 0.098 | 0.33            | 3.2E-02 | 0.351 *  |
| RND1        | Rho family gtpase 1                                           | -0.58   | 5.4E-04 | 0.104 | 0.34            | 1.8E-01 | 0.597    |
| DNAJB2      | Dnaj (Hsp40) homolog, subfamily B, member 2                   | -0.48   | 5.6E-04 | 0.108 | 0.24            | 2.0E-01 | 0.617    |
| PI4KB       | Phosphatidylinositol 4-kinase, catalytic, beta                | -0.44   | 5.9E-04 | 0.110 | -0.05           | 7.1E-01 | 0.920    |
| PSRC1       | Proline/serine-rich coiled-coil 1                             | -0.43   | 6.1E-04 | 0.111 | -0.16           | 4.2E-01 | 0.788    |

|         |                                                                        |       |         |       |       |         |          |
|---------|------------------------------------------------------------------------|-------|---------|-------|-------|---------|----------|
| UQCRC2  | Ubiquinol-cytochrome c reductase core protein II                       | -0.56 | 6.3E-04 | 0.112 | -0.42 | 9.9E-02 | 0.494    |
| OPCML   | Opioid binding protein/cell adhesion molecule-like                     | -0.71 | 6.4E-04 | 0.113 | -0.03 | 9.0E-01 | 0.988    |
| STMN4   | Stathmin-like 4                                                        | -0.76 | 7.2E-04 | 0.116 | -0.29 | 1.6E-01 | 0.571    |
| SLC6A1  | Solute carrier family 6 (neurotransmitter transporter, GABA), member 1 | -0.40 | 7.4E-04 | 0.117 | -0.18 | 3.8E-01 | 0.762    |
| KLF13   | Kruppel-like factor 13                                                 | 0.57  | 7.6E-04 | 0.119 | 0.40  | 2.9E-03 | 0.172 ** |
| C5orf4  | Chromosome 5 open reading frame 4                                      | -0.73 | 7.7E-04 | 0.119 | -0.11 | 5.1E-01 | 0.837    |
| FAM18B2 | Family with sequence similarity 18, member B2                          | 0.75  | 7.8E-04 | 0.119 | 0.00  | 1.0E+00 | 1.000    |
| MYL6    | Myosin, light chain 6, alkali, smooth muscle and non-muscle            | -0.64 | 8.0E-04 | 0.121 | -0.05 | 7.8E-01 | 0.945    |
| RNASE1  | Ribonuclease, rnase A family, 1 (pancreatic)                           | -0.57 | 8.9E-04 | 0.127 | -0.15 | 4.6E-01 | 0.813    |
| MYO1F   | Myosin IF                                                              | -1.10 | 9.4E-04 | 0.129 | -0.01 | 9.4E-01 | 1.000    |
| SOX10   | SRY (sex determining region Y)-box 10                                  | -0.54 | 9.4E-04 | 0.129 | 0.13  | 4.6E-01 | 0.813    |
| METTL2  | Methyltransferase like 2B                                              | 0.67  | 9.7E-04 | 0.129 | -0.23 | 3.1E-01 | 0.708    |
| AMMEC   | AMME chromosomal region gene 1-like                                    | -0.82 | 1.0E-03 | 0.131 | -0.26 | 1.1E-01 | 0.508    |
| R1L     |                                                                        |       |         |       |       |         |          |
| SLCO2B1 | Solute carrier organic anion transporter family, member 2B1            | -0.77 | 1.0E-03 | 0.131 | 0.01  | 9.7E-01 | 1.000    |
| SH3BGR  | SH3 domain binding glutamic acid-rich protein like 2                   | 0.48  | 1.0E-03 | 0.131 | 0.33  | 7.4E-02 | 0.452    |
| L2      |                                                                        |       |         |       |       |         |          |
| TRIM2   | Tripartite motif-containing 2                                          | -0.62 | 1.1E-03 | 0.132 | 0.01  | 9.7E-01 | 1.000    |
| CALM2   | Calmodulin 2 (phosphorylase kinase, delta)                             | -0.38 | 1.1E-03 | 0.133 | -0.77 | 1.2E-02 | 0.264 *  |
| FADS3   | Fatty acid desaturase 3                                                | 0.35  | 1.1E-03 | 0.137 | 0.36  | 9.6E-02 | 0.489    |
| DKK2    | Dickkopf homolog 2 (Xenopus laevis)                                    | -0.54 | 1.2E-03 | 0.139 | 0.04  | 9.1E-01 | 0.995    |
| HAVCR2  | Hepatitis A virus cellular receptor 2                                  | -0.85 | 1.3E-03 | 0.151 | -0.67 | 3.4E-02 | 0.356 *  |
| PRIM2   | Primase, DNA, polypeptide 2 (58kda)                                    | -0.59 | 1.5E-03 | 0.159 | 0.17  | 5.9E-01 | 0.869    |
| LARP7   | La ribonucleoprotein domain family, member 7                           | -0.66 | 1.5E-03 | 0.163 | -0.27 | 3.2E-01 | 0.719    |
| C4orf21 | Chromosome 4 open reading frame 21                                     | -0.66 | 1.5E-03 | 0.163 | -0.18 | 5.6E-01 | 0.857    |
| APOLD1  | Apolipoprotein L domain containing 1                                   | 0.43  | 1.6E-03 | 0.164 | 0.23  | 5.2E-01 | 0.843    |
| LRFN3   | Leucine rich repeat and fibronectin type III domain containing 3       | -0.47 | 1.6E-03 | 0.164 | -0.13 | 4.2E-01 | 0.788    |
| PCDHGA  | Protocadherin gamma subfamily A, 9                                     | -1.13 | 1.6E-03 | 0.164 | 0.31  | 1.3E-01 | 0.543    |
| 9       |                                                                        |       |         |       |       |         |          |
| GPR176  | G protein-coupled receptor 176                                         | 0.40  | 1.6E-03 | 0.164 | -0.33 | 1.6E-01 | 0.574    |
| LACE1   | Lactation elevated 1                                                   | -0.36 | 1.7E-03 | 0.164 | 0.13  | 5.0E-01 | 0.833    |
| CHAD    | Chondroadherin                                                         | 0.53  | 1.7E-03 | 0.164 | -0.24 | 2.7E-01 | 0.682    |
| TF      | Transferrin                                                            | -0.45 | 1.8E-03 | 0.164 | -0.15 | 5.3E-01 | 0.846    |
| ARHGEF  | Rho/Rac guanine nucleotide exchange factor (GEF) 2                     | -0.43 | 1.8E-03 | 0.164 | 0.07  | 6.4E-01 | 0.888    |
| 2       |                                                                        |       |         |       |       |         |          |



|         |                                                                                   |       |         |       |       |         |          |
|---------|-----------------------------------------------------------------------------------|-------|---------|-------|-------|---------|----------|
| TXNIP   | Thioredoxin interacting protein                                                   | -0.57 | 1.8E-03 | 0.166 | 0.26  | 3.1E-01 | 0.709    |
| ADAMTS4 | ADAM metallopeptidase with thrombospondin type 1 motif, 4                         | -0.53 | 1.9E-03 | 0.166 | 0.65  | 2.9E-03 | 0.173 ** |
| NDUFS2  | NADH dehydrogenase (ubiquinone) Fe-S protein 2, 49kda (NADH-coenzyme Q reductase) | -0.53 | 1.9E-03 | 0.166 | -0.49 | 8.7E-03 | 0.232 *  |
| HSD17B7 | Hydroxysteroid (17-beta) dehydrogenase 7                                          | 2.47  | 1.9E-03 | 0.166 | -0.18 | 5.3E-01 | 0.846    |
| ZNF595  | Zinc finger protein 595                                                           | -0.52 | 1.9E-03 | 0.166 | 0.21  | 4.0E-01 | 0.778    |
| TOMM7   | Translocase of outer mitochondrial membrane 7 homolog (yeast)                     | -0.67 | 1.9E-03 | 0.167 | -0.24 | 1.5E-01 | 0.563    |
| IRS2    | Insulin receptor substrate 2                                                      | 0.53  | 1.9E-03 | 0.167 | -0.02 | 9.5E-01 | 1.000    |
| ATG4C   | ATG4 autophagy related 4 homolog C (S. Cerevisiae)                                | -0.60 | 2.0E-03 | 0.169 | -0.34 | 1.0E-01 | 0.495    |
| ATP2C2  | ATPase, Ca <sup>++</sup> transporting, type 2C, member 2                          | 0.78  | 2.0E-03 | 0.171 | 0.24  | 1.4E-01 | 0.550    |
| RG9MTD1 | RNA (guanine-9-) methyltransferase domain containing 1                            | -0.66 | 2.1E-03 | 0.171 | -0.26 | 2.1E-01 | 0.626    |
| GTPBP10 | GTP-binding protein 10 (putative)                                                 | -0.68 | 2.1E-03 | 0.171 | -0.24 | 1.7E-01 | 0.584    |
| SKI     | V-ski sarcoma viral oncogene homolog (avian)                                      | 0.45  | 2.1E-03 | 0.171 | 0.30  | 5.9E-02 | 0.421    |
| NBPF1   | Neuroblastoma breakpoint family, member 1                                         | 0.62  | 2.1E-03 | 0.171 | 0.64  | 5.6E-02 | 0.413    |
| EIF3E   | Eukaryotic translation initiation factor 3, subunit E                             | -0.60 | 2.1E-03 | 0.171 | 0.10  | 6.8E-01 | 0.908    |
| TCERG1L | Transcription elongation regulator 1-like L                                       | 0.59  | 2.1E-03 | 0.171 | -0.18 | 3.0E-01 | 0.703    |
| UQCRB   | Ubiquinol-cytochrome c reductase binding protein                                  | -0.66 | 2.2E-03 | 0.172 | -0.44 | 1.7E-02 | 0.298 *  |
| WWC2    | WW and C2 domain containing 2                                                     | 0.38  | 2.2E-03 | 0.173 | 0.21  | 2.7E-01 | 0.679    |
| ZNF496  | Zinc finger protein 496                                                           | 0.39  | 2.2E-03 | 0.173 | -0.05 | 6.9E-01 | 0.910    |
| ZNF462  | Zinc finger protein 462                                                           | -0.32 | 2.2E-03 | 0.174 | 0.46  | 4.5E-03 | 0.192 ** |
| TFEB    | Transcription factor EB                                                           | -0.29 | 2.3E-03 | 0.175 | 0.14  | 4.7E-01 | 0.816    |
| PNOC    | Prepronociceptin                                                                  | -0.80 | 2.4E-03 | 0.183 | -0.54 | 4.4E-02 | 0.383 *  |
| SOCS2   | Suppressor of cytokine signaling 2                                                | 0.35  | 2.5E-03 | 0.184 | 0.00  | 9.9E-01 | 1.000    |
| TUBGCP5 | Tubulin, gamma complex associated protein 5                                       | 0.43  | 2.5E-03 | 0.186 | -0.20 | 2.7E-01 | 0.682    |
| SH3TC2  | SH3 domain and tetratricopeptide repeats 2                                        | -0.65 | 2.5E-03 | 0.186 | 0.45  | 5.5E-02 | 0.411    |
| SLC1A3  | Solute carrier family 1 (glial high affinity glutamate transporter), member 3     | -0.54 | 2.6E-03 | 0.186 | -0.17 | 4.6E-01 | 0.816    |
| CYYR1   |                                                                                   | 0.76  | 2.6E-03 | 0.186 | 0.00  | 9.9E-01 | 1.000    |
| ASS1    | Argininosuccinate synthetase 1                                                    | 0.68  | 2.6E-03 | 0.187 | -0.07 | 7.6E-01 | 0.938    |
| FBXL2   | F-box and leucine-rich repeat protein 2                                           | 0.55  | 2.6E-03 | 0.188 | -0.33 | 1.5E-01 | 0.561    |
| TMEM10  | Oligodendrocytic myelin paranodal and inner loop protein                          | -0.77 | 2.7E-03 | 0.188 | -0.36 | 2.5E-01 | 0.660    |

|           |                                                                                           |       |         |       |       |         |         |
|-----------|-------------------------------------------------------------------------------------------|-------|---------|-------|-------|---------|---------|
| SH3BP5L   | SH3-binding domain protein 5-like                                                         | -0.58 | 2.7E-03 | 0.189 | -0.03 | 8.8E-01 | 0.982   |
| MLL5      | Myeloid/lymphoid or mixed-lineage leukemia 5 (trithorax homolog, Drosophila)              | -0.38 | 2.7E-03 | 0.189 | 0.18  | 3.4E-01 | 0.730   |
| FGF12     | Fibroblast growth factor 12                                                               | -0.63 | 2.8E-03 | 0.192 | -0.12 | 5.5E-01 | 0.853   |
| CSDE1     | Cold shock domain containing E1, RNA-binding                                              | -0.50 | 2.8E-03 | 0.192 | 0.12  | 4.1E-01 | 0.784   |
| ZNF770    | Zinc finger protein 770                                                                   | -0.40 | 2.9E-03 | 0.192 | -0.04 | 8.2E-01 | 0.964   |
| SBDS      | Shwachman-Bodian-Diamond syndrome                                                         | 0.50  | 2.9E-03 | 0.193 | -0.36 | 6.5E-02 | 0.431   |
| PCDHA2    | Protocadherin alpha 2                                                                     | 2.62  | 2.9E-03 | 0.193 | -0.40 | 1.4E-01 | 0.545   |
| PTN       | Pleiotrophin                                                                              | -0.62 | 2.9E-03 | 0.193 | 0.09  | 6.3E-01 | 0.884   |
| EIF2B5    | Eukaryotic translation initiation factor 2B, subunit 5 epsilon, 82kda                     | -0.47 | 3.0E-03 | 0.197 | 0.04  | 7.9E-01 | 0.951   |
| CDKN2A IP | CDKN2A interacting protein                                                                | 0.35  | 3.0E-03 | 0.197 | -0.21 | 2.5E-01 | 0.660   |
| CPEB4     | Cytoplasmic polyadenylation element binding protein 4                                     | -0.49 | 3.0E-03 | 0.197 | 0.37  | 2.0E-01 | 0.623   |
| CHRM1     | Cholinergic receptor, muscarinic 1                                                        | -0.67 | 3.0E-03 | 0.197 | -0.10 | 6.2E-01 | 0.878   |
| APOD      | Apolipoprotein D                                                                          | -0.82 | 3.1E-03 | 0.197 | 0.32  | 1.4E-01 | 0.549   |
| TLN1      | Talin 1                                                                                   | -0.39 | 3.1E-03 | 0.197 | 0.07  | 6.4E-01 | 0.890   |
| CREB3     | Camp responsive element binding protein 3                                                 | -0.39 | 3.1E-03 | 0.197 | 0.15  | 2.4E-01 | 0.654   |
| KCNN3     | Potassium intermediate/small conductance calcium-activated channel, subfamily N, member 3 | -0.33 | 3.1E-03 | 0.198 | 0.18  | 4.3E-01 | 0.792   |
| CTF1      | Cardiotrophin 1                                                                           | 1.11  | 3.2E-03 | 0.199 | 0.10  | 5.3E-01 | 0.844   |
| SERF2     | Small EDRK-rich factor 2                                                                  | -0.35 | 3.2E-03 | 0.199 | 0.26  | 5.5E-02 | 0.411   |
| CXCL5     | Chemokine (C-X-C motif) ligand 5                                                          | 0.69  | 3.2E-03 | 0.199 | -0.25 | 3.5E-01 | 0.743   |
| SPOCK3    | Sparc/osteonectin, cwcv and kazal-like domains proteoglycan (testican) 3                  | -0.37 | 3.2E-03 | 0.199 | -0.46 | 3.1E-02 | 0.349 * |
| RILPL2    | Rab interacting lysosomal protein-like 2                                                  | 0.49  | 3.2E-03 | 0.199 | 0.24  | 1.3E-01 | 0.543   |

\* Gene expression  $P < 0.05$

\*\* Gene expression FDR  $< 0.2$

Table S13. Histone H3K4me3 changes ( $P < 0.005$ ) at the promoters of expressed genes in chronic alcoholic individuals.

| Gene Symbol | Gene Name                                                                         | H3K4me3 |         |       | Gene Expression |         |         |
|-------------|-----------------------------------------------------------------------------------|---------|---------|-------|-----------------|---------|---------|
|             |                                                                                   | Log FC  | P value | FDR   | Log FC          | P value | FDR     |
| NSUN6       | NOL1/NOP2/Sun domain family, member 6                                             | -0.74   | 5.9E-05 | 0.325 | -0.20           | 2.0E-01 | 0.792   |
| ZNF675      | Zinc finger protein 675                                                           | 0.69    | 7.2E-05 | 0.325 | 0.08            | 6.4E-01 | 0.933   |
| GPD1        | Glycerol-3-phosphate dehydrogenase 1 (soluble)                                    | -0.94   | 7.6E-05 | 0.325 | -0.06           | 7.7E-01 | 0.968   |
| ZNF740      | Zinc finger protein 740                                                           | -0.35   | 2.3E-04 | 0.412 | 0.17            | 3.3E-01 | 0.855   |
| CSAD        | Cysteine sulfinic acid decarboxylase                                              | -0.35   | 2.3E-04 | 0.412 | -0.02           | 8.8E-01 | 0.996   |
| NACA        | Nascent polypeptide-associated complex alpha subunit                              | -0.79   | 2.6E-04 | 0.412 | -0.11           | 5.4E-01 | 0.920   |
| PSCD4       | Cytohesin 4                                                                       | -0.94   | 3.2E-04 | 0.444 | -0.15           | 4.3E-01 | 0.888   |
| D4S234E     | DNA segment on chromosome 4 (unique) 234 expressed sequence                       | 0.38    | 4.8E-04 | 0.525 | 0.10            | 6.9E-01 | 0.947   |
| CHD8        | Chromodomain helicase DNA binding protein 8                                       | -0.53   | 5.4E-04 | 0.531 | -0.28           | 2.0E-01 | 0.792   |
| MED19       | Mediator complex subunit 19                                                       | -0.52   | 5.6E-04 | 0.531 | 0.07            | 7.3E-01 | 0.959   |
| TXNDC14     | Thioredoxin-related transmembrane protein 2                                       | -0.52   | 5.6E-04 | 0.531 | 0.00            | 1.0E+00 | 1.000   |
| AIFM3       | Apoptosis-inducing factor, mitochondrion-associated, 3                            | 0.76    | 5.8E-04 | 0.534 | -0.08           | 6.3E-01 | 0.930   |
| SQRDL       | Sulfide quinone reductase-like (yeast)                                            | 0.72    | 7.0E-04 | 0.589 | 0.00            | 9.9E-01 | 1.000   |
| BAT2        | HLA-B associated transcript 2                                                     | -0.55   | 8.6E-04 | 0.663 | 0.21            | 3.2E-01 | 0.855   |
| GPR78       | G protein-coupled receptor 78                                                     | 0.81    | 8.7E-04 | 0.663 | 0.45            | 2.1E-01 | 0.800   |
| C15orf23    | Chromosome 15 open reading frame 23                                               | -0.41   | 1.1E-03 | 0.663 | -0.08           | 6.8E-01 | 0.943   |
| EXOSC10     | Exosome component 10                                                              | 0.45    | 1.2E-03 | 0.663 | 0.11            | 5.1E-01 | 0.912   |
| PODXL2      | Podocalyxin-like 2                                                                | -0.29   | 1.4E-03 | 0.663 | 0.10            | 6.5E-01 | 0.935   |
| FAT         | FAT tumor suppressor homolog 1 (Drosophila)                                       | 0.30    | 1.6E-03 | 0.663 | 0.00            | 1.0E+00 | 1.000   |
| METTL2B     | Methyltransferase like 2B                                                         | 0.63    | 1.7E-03 | 0.663 | -0.31           | 1.7E-01 | 0.774   |
| AQP11       | Aquaporin 11                                                                      | 0.34    | 1.8E-03 | 0.663 | 0.33            | 3.8E-02 | 0.558 * |
| EIF1AD      | Eukaryotic translation initiation factor 1A domain containing                     | -0.32   | 2.0E-03 | 0.663 | 0.13            | 5.0E-01 | 0.912   |
| BANF1       | Barrier to autointegration factor 1                                               | -0.32   | 2.0E-03 | 0.663 | -0.13           | 6.0E-01 | 0.927   |
| MSC         | Musculin (activated B-cell factor-1)                                              | 0.67    | 2.1E-03 | 0.663 | 0.14            | 4.3E-01 | 0.889   |
| C1orf84     | Chromosome 1 open reading frame 84                                                | -0.37   | 2.2E-03 | 0.663 | 0.86            | 1.3E-03 | 0.250 * |
| MED8        | Mediator complex subunit 8                                                        | -0.37   | 2.2E-03 | 0.663 | -0.07           | 7.2E-01 | 0.955   |
| SMPD3       | Sphingomyelin phosphodiesterase 3, neutral membrane (neutral sphingomyelinase II) | 0.32    | 2.4E-03 | 0.663 | -0.08           | 7.6E-01 | 0.964   |
| CARS2       | Cysteinyl-trna synthetase 2, mitochondrial (putative)                             | -0.56   | 2.4E-03 | 0.663 | -0.10           | 6.1E-01 | 0.928   |
| IFI35       | Interferon-induced protein 35                                                     | -1.04   | 2.4E-03 | 0.663 | -0.03           | 8.8E-01 | 0.994   |
| APLN        | Apelin                                                                            | 0.71    | 2.5E-03 | 0.663 | -0.20           | 2.9E-01 | 0.838   |

|          |                                                                                   |       |         |       |       |         |         |
|----------|-----------------------------------------------------------------------------------|-------|---------|-------|-------|---------|---------|
| PRPF6    | PRP6 pre-mrna processing factor 6 homolog<br>( <i>S. Cerevisiae</i> )             | -0.45 | 2.5E-03 | 0.663 | -0.03 | 7.8E-01 | 0.970   |
| KLHL7    | Kelch-like 7 ( <i>Drosophila</i> )                                                | 0.40  | 2.6E-03 | 0.663 | -0.02 | 9.2E-01 | 1.000   |
| SLITRK2  | SLIT and NTRK-like family, member 2                                               | 0.52  | 2.6E-03 | 0.663 | 0.09  | 5.4E-01 | 0.920   |
| CCDC66   | Coiled-coil domain containing 66                                                  | 0.53  | 2.6E-03 | 0.663 | -0.39 | 1.1E-01 | 0.700   |
| MYO1F    | Myosin IF                                                                         | -0.99 | 2.6E-03 | 0.663 | -0.05 | 7.8E-01 | 0.970   |
| CXCL5    | Chemokine (C-X-C motif) ligand 5                                                  | 0.70  | 2.8E-03 | 0.663 | -0.83 | 3.7E-03 | 0.351 * |
| C19orf47 | Chromosome 19 open reading frame 47                                               | -0.43 | 2.8E-03 | 0.663 | 0.18  | 2.8E-01 | 0.830   |
| PLD3     | Phospholipase D family, member 3                                                  | -0.43 | 2.8E-03 | 0.663 | 0.09  | 7.4E-01 | 0.959   |
| PPP1R3F  | Protein phosphatase 1, regulatory (inhibitor)<br>subunit 3F                       | -0.41 | 2.8E-03 | 0.663 | 0.14  | 4.3E-01 | 0.891   |
| C12orf41 | Chromosome 12 open reading frame 41                                               | -0.43 | 3.0E-03 | 0.663 | -0.04 | 8.4E-01 | 0.988   |
| ZNF385B  | Zinc finger protein 385B                                                          | 0.59  | 3.1E-03 | 0.663 | 0.22  | 2.7E-01 | 0.828   |
| TMEM65   | Transmembrane protein 65                                                          | 0.28  | 3.1E-03 | 0.663 | -0.07 | 6.4E-01 | 0.931   |
| SCRN3    | Secernin 3                                                                        | -0.41 | 3.2E-03 | 0.663 | -0.39 | 1.3E-02 | 0.449 * |
| CIR      | Potassium inwardly-rectifying channel,<br>subfamily J, member 5                   | -0.41 | 3.2E-03 | 0.663 | -0.52 | 2.2E-02 | 0.515 * |
| POP5     | Processing of precursor 5, ribonuclease<br>P/MRP subunit ( <i>S. Cerevisiae</i> ) | 0.48  | 3.2E-03 | 0.663 | -0.02 | 8.8E-01 | 0.994   |
| PON3     | Paraoxonase 3                                                                     | 0.65  | 3.2E-03 | 0.663 | -0.68 | 3.8E-02 | 0.559 * |
| FGD1     | FYVE, rhogef and PH domain containing 1                                           | 0.45  | 3.3E-03 | 0.663 | -0.05 | 7.9E-01 | 0.974   |
| SPPL2A   | Signal peptide peptidase-like 2A                                                  | -0.61 | 3.3E-03 | 0.663 | -0.27 | 1.1E-01 | 0.693   |
| ABHD4    | Abhydrolase domain containing 4                                                   | -0.43 | 3.4E-03 | 0.663 | -0.10 | 5.1E-01 | 0.913   |
| C18orf32 | Chromosome 18 open reading frame 32                                               | -0.41 | 3.4E-03 | 0.663 | -0.24 | 2.1E-01 | 0.797   |
| PGM3     | Phosphoglucosyltransferase 3                                                      | 0.35  | 3.4E-03 | 0.663 | -0.21 | 1.6E-01 | 0.767   |
| RWDD2A   | RWD domain containing 2A                                                          | 0.35  | 3.4E-03 | 0.663 | -0.04 | 8.3E-01 | 0.986   |
| PGAP1    | Post-GPI attachment to proteins 1                                                 | -0.40 | 3.4E-03 | 0.663 | -0.02 | 9.3E-01 | 1.000   |
| ZNF643   | Zinc finger protein 643                                                           | -0.43 | 3.4E-03 | 0.663 | 0.02  | 9.2E-01 | 1.000   |
| COPB2    | Coatomer protein complex, subunit beta 2<br>(beta prime)                          | 0.54  | 3.4E-03 | 0.663 | -0.14 | 3.4E-01 | 0.857   |
| PRKCH    | Protein kinase C, eta                                                             | 0.48  | 3.5E-03 | 0.663 | 0.10  | 6.2E-01 | 0.928   |
| TSN      | Translin                                                                          | -0.45 | 3.5E-03 | 0.663 | -0.27 | 9.4E-02 | 0.677   |
| ZSCAN16  | Zinc finger and SCAN domain containing<br>16                                      | -0.71 | 3.6E-03 | 0.663 | 0.21  | 1.5E-01 | 0.754   |
| FAM129B  | Family with sequence similarity 129,<br>member B                                  | -2.30 | 3.7E-03 | 0.663 | -0.02 | 9.2E-01 | 1.000   |
| SLC35E1  | Solute carrier family 35, member E1                                               | -0.28 | 3.7E-03 | 0.663 | -0.08 | 5.3E-01 | 0.917   |
| PPP1R11  | Protein phosphatase 1, regulatory (inhibitor)<br>subunit 11                       | -0.51 | 3.7E-03 | 0.663 | -0.10 | 8.1E-01 | 0.981   |
| C12orf39 | Chromosome 12 open reading frame 39                                               | 0.50  | 3.8E-03 | 0.663 | -0.40 | 1.9E-01 | 0.788   |
| CDKN2AIP | CDKN2A interacting protein                                                        | 0.34  | 3.8E-03 | 0.663 | -0.25 | 1.8E-01 | 0.781   |
| PI4KB    | Phosphatidylinositol 4-kinase, catalytic, beta                                    | -0.36 | 3.8E-03 | 0.663 | -0.26 | 4.7E-02 | 0.581 * |
| ORC2L    | Origin recognition complex, subunit 2-like<br>(yeast)                             | 0.50  | 3.9E-03 | 0.663 | 0.18  | 2.3E-01 | 0.802   |
| PHF21A   | PHD finger protein 21A                                                            | -0.35 | 3.9E-03 | 0.663 | -0.01 | 9.4E-01 | 1.000   |

|         |                                                                                                   |       |         |       |       |         |         |
|---------|---------------------------------------------------------------------------------------------------|-------|---------|-------|-------|---------|---------|
| GNL3    | Guanine nucleotide binding protein-like 3 (nucleolar)                                             | -0.49 | 4.0E-03 | 0.663 | -0.48 | 1.4E-02 | 0.452 * |
| PBRM1   | Polybromo 1                                                                                       | -0.49 | 4.0E-03 | 0.663 | -0.01 | 9.4E-01 | 1.000   |
| C14orf1 | Chromosome 14 open reading frame 1                                                                | 0.62  | 4.0E-03 | 0.663 | -0.09 | 5.8E-01 | 0.925   |
| TLL5    | Tubulin tyrosine ligase-like family, member 5                                                     | 0.62  | 4.0E-03 | 0.663 | -0.07 | 6.7E-01 | 0.941   |
| LRRC20  | Leucine rich repeat containing 20                                                                 | 0.48  | 4.0E-03 | 0.663 | -0.02 | 9.2E-01 | 1.000   |
| SMARCD2 | SWI/SNF related, matrix associated, actin dependent regulator of chromatin, subfamily d, member 2 | 0.33  | 4.0E-03 | 0.663 | -0.28 | 1.6E-01 | 0.761   |
| MTERFD3 | MTERF domain containing 3                                                                         | 0.76  | 4.1E-03 | 0.663 | -0.29 | 4.6E-02 | 0.580 * |
| MDN1    | Midasin                                                                                           | -0.37 | 4.2E-03 | 0.668 | -0.21 | 3.0E-01 | 0.843   |
| KLHL2   | Kelch-like 2, Mayven (Drosophila)                                                                 | -0.25 | 4.4E-03 | 0.668 | 0.21  | 4.4E-01 | 0.892   |
| ANKRD19 | Ankyrin repeat domain 19 pseudogene                                                               | 0.47  | 4.4E-03 | 0.668 | 0.19  | 4.5E-01 | 0.899   |
| PITPNA  | Phosphatidylinositol transfer protein, alpha                                                      | -0.40 | 4.4E-03 | 0.668 | 0.20  | 3.5E-01 | 0.859   |
| WDFY2   | WD repeat and FYVE domain containing 2                                                            | 0.31  | 4.5E-03 | 0.668 | 0.20  | 1.9E-01 | 0.789   |
| GPM6A   | Glycoprotein M6A                                                                                  | -0.48 | 4.5E-03 | 0.668 | -0.14 | 4.1E-01 | 0.883   |
| C10orf4 | Chromosome 10 open reading frame 4                                                                | -0.50 | 4.5E-03 | 0.668 | -0.08 | 7.3E-01 | 0.958   |
| TMLHE   | Trimethyllysine hydroxylase, epsilon                                                              | 0.63  | 4.7E-03 | 0.678 | -0.03 | 8.8E-01 | 0.995   |
| JUB     | Jub, ajuba homolog (Xenopus laevis)                                                               | 0.40  | 4.9E-03 | 0.693 | -0.44 | 9.9E-02 | 0.682   |

\* Gene expression  $P < 0.05$

Table S14. Genes with up- or down-regulation of both mRNA expression and histone H3K4me3 modification (uncorrected  $P < 0.05$ ) in chronic cocaine addicted individuals

| Gene Symbol | Gene Name                                                        | Gene Expression |          | H3K4me3 |          |
|-------------|------------------------------------------------------------------|-----------------|----------|---------|----------|
|             |                                                                  | Log FC          | P Value  | Log FC  | P Value  |
| IGSF9B      | Protein turtle homolog B                                         | 1.055           | 1.29E-04 | 0.310   | 3.65E-02 |
| TRPV4       | Transient receptor potential cation channel subfamily V member 4 | 0.948           | 3.28E-02 | 0.915   | 3.35E-02 |
| SYPL2       | Synaptophysin-like protein 2                                     | 0.897           | 5.78E-03 | 0.377   | 2.39E-02 |
| IGF1R       | Insulin-like growth factor 1 receptor                            | 0.800           | 7.91E-06 | 0.318   | 1.85E-02 |
| FAM20A      | Protein FAM20A                                                   | 0.676           | 7.78E-03 | 0.329   | 4.03E-02 |
| MSI1        | RNA-binding protein Musashi homolog 1                            | 0.596           | 1.67E-03 | 0.262   | 4.61E-02 |
| MICALL2     | MICAL-like protein 2                                             | 0.550           | 8.78E-04 | 0.245   | 4.79E-02 |
| MTERFD2     | MTERF domain containing 2                                        | 0.536           | 1.05E-02 | 0.300   | 2.53E-02 |
| SYTL4       | Synaptotagmin-like protein 4                                     | 0.509           | 4.30E-02 | 0.715   | 3.43E-02 |
| HELZ        | Probable helicase with zinc finger domain                        | 0.508           | 3.88E-03 | 0.339   | 5.39E-03 |
| PGF         | Placenta growth factor                                           | 0.476           | 4.20E-02 | 0.350   | 4.99E-02 |
| SVIL        | Supervillin                                                      | 0.472           | 1.65E-02 | 0.271   | 8.87E-03 |
| ATF7IP      | Activating transcription factor 7-interacting protein 1          | 0.468           | 2.34E-03 | 0.787   | 2.90E-02 |
| EYA1        | Eyes absent homolog 1                                            | 0.456           | 3.61E-03 | 0.745   | 2.23E-02 |
| ANXA3       | Annexin A3                                                       | 0.450           | 4.47E-02 | 0.580   | 2.12E-02 |
| DDR2        | Discoidin domain-containing receptor 2                           | 0.448           | 3.43E-02 | 1.413   | 3.08E-02 |
| COL6A2      | Collagen alpha-2(VI) chain                                       | 0.428           | 4.58E-02 | 0.566   | 5.58E-03 |
| TOP3B       | DNA topoisomerase 3-beta-1                                       | 0.419           | 1.56E-02 | 0.417   | 1.96E-02 |
| COL4A3      | Collagen alpha-3(IV) chain                                       | 0.415           | 1.95E-02 | 0.250   | 3.36E-02 |
| PPAN-P2RY11 | PPAN-P2RY11 readthrough                                          | 0.397           | 2.28E-02 | 0.307   | 4.40E-02 |
| KLF13       | Krueppel-like factor 13                                          | 0.395           | 2.87E-03 | 0.571   | 7.62E-04 |
| INSR        | Insulin receptor                                                 | 0.394           | 2.69E-02 | 0.251   | 1.65E-02 |
| EP400       | E1A-binding protein p400                                         | 0.391           | 1.12E-02 | 0.263   | 4.40E-02 |
| SLITRK2     | SLIT and NTRK-like protein 2                                     | 0.385           | 1.32E-02 | 0.331   | 4.41E-02 |
| METRNL      | Meteorin-like protein                                            | 0.380           | 4.53E-02 | 0.413   | 1.49E-02 |
| C17orf76    | Chromosome 17 open reading frame 76                              | 0.365           | 2.18E-02 | 0.362   | 1.60E-02 |
| PPAN        | Suppressor of SWI4 1 homolog                                     | 0.354           | 2.43E-02 | 0.307   | 4.40E-02 |
| RREB1       | Ras-responsive element-binding protein 1                         | 0.345           | 8.13E-03 | 0.293   | 1.72E-02 |
| FOXO1       | Forkhead box protein O1                                          | 0.340           | 4.89E-02 | 0.339   | 6.95E-03 |
| TTC7A       | Tetratricopeptide repeat protein 7A                              | 0.328           | 7.93E-03 | 0.333   | 1.63E-02 |
| CDC42EP3    | Cdc42 effector protein 3                                         | 0.299           | 4.18E-02 | 0.289   | 1.86E-02 |
| CALM2       | Calmodulin 2                                                     | -0.765          | 1.25E-02 | -0.381  | 1.09E-03 |
| PRDM8       | PR domain zinc finger protein 8                                  | -0.675          | 2.65E-02 | -0.333  | 3.19E-02 |

|          |                                                                          |        |          |        |          |
|----------|--------------------------------------------------------------------------|--------|----------|--------|----------|
| HAVCR2   | Hepatitis A virus cellular receptor 2                                    | -0.669 | 3.38E-02 | -0.852 | 1.32E-03 |
| CYB5B    | Cytochrome b5 type B                                                     | -0.623 | 9.18E-03 | -0.472 | 1.86E-02 |
| HADHB    | Trifunctional enzyme subunit beta, mitochondrial                         | -0.588 | 5.29E-03 | -0.308 | 1.63E-02 |
| ACP2     | Lysosomal acid phosphatase                                               | -0.552 | 3.89E-03 | -0.543 | 2.89E-04 |
| MRPS18C  | Mitochondrial ribosomal protein S18C                                     | -0.549 | 2.03E-02 | -0.389 | 3.65E-02 |
| PNOC     | Nociceptin                                                               | -0.538 | 4.43E-02 | -0.802 | 2.45E-03 |
| EXTL2    | Exostosin-like 2                                                         | -0.535 | 3.55E-03 | -0.353 | 6.71E-03 |
| RNF181   | E3 ubiquitin-protein ligase RNF181                                       | -0.529 | 2.36E-02 | -0.311 | 4.59E-02 |
| NDUFA12L | NADH dehydrogenase (ubiquinone) 1 alpha subcomplex, assembly factor 2    | -0.527 | 7.48E-03 | -0.372 | 4.73E-02 |
| SLC6A15  | Orphan sodium- and chloride-dependent neurotransmitter transporter NTT73 | -0.511 | 1.68E-02 | -0.329 | 1.62E-02 |
| KIAA0528 | Uncharacterized protein KIAA0528                                         | -0.510 | 5.95E-03 | -0.263 | 3.54E-02 |
| MRPS33   | 28S ribosomal protein S33, mitochondrial                                 | -0.491 | 1.27E-02 | -0.496 | 1.15E-02 |
| TRO      | Trophinin                                                                | -0.488 | 5.91E-04 | -0.749 | 8.55E-03 |
| NDUFS2   | NADH dehydrogenase [ubiquinone] iron-sulfur protein 2, mitochondrial     | -0.486 | 8.75E-03 | -0.531 | 1.85E-03 |
| CDC123   | Cell division cycle protein 123 homolog                                  | -0.476 | 1.89E-02 | -0.574 | 1.41E-04 |
| ISCU     | Iron-sulfur cluster assembly enzyme ISCU, mitochondrial                  | -0.473 | 2.85E-02 | -0.324 | 3.80E-03 |
| MED8     | Mediator of RNA polymerase II transcription subunit 8                    | -0.460 | 2.21E-02 | -0.283 | 1.52E-02 |
| SPOCK3   | Testican-3                                                               | -0.459 | 3.15E-02 | -0.369 | 3.21E-03 |
| GPD1     | Glycerol-3-phosphate dehydrogenase [NAD+], cytoplasmic                   | -0.447 | 3.71E-02 | -0.874 | 1.80E-04 |
| UQCRB    | Cytochrome b-c1 complex subunit 7                                        | -0.438 | 1.75E-02 | -0.665 | 2.16E-03 |
| MRPL24   | 39S ribosomal protein L24, mitochondrial                                 | -0.436 | 5.68E-03 | -0.324 | 4.68E-02 |
| C1orf19  | chromosome 1 open reading frame 19                                       | -0.414 | 1.25E-02 | -0.256 | 4.65E-02 |
| PIGS     | GPI transamidase component PIG-S                                         | -0.409 | 1.49E-02 | -0.315 | 2.05E-02 |
| MRPL2    | 39S ribosomal protein L2, mitochondrial                                  | -0.397 | 1.81E-02 | -0.333 | 8.17E-03 |
| ZWILCH   | Protein zwilch homolog                                                   | -0.396 | 1.05E-02 | -0.460 | 1.44E-02 |
| CCDC49   | Coiled-coil domain containing 49                                         | -0.395 | 3.86E-02 | -0.489 | 1.81E-02 |
| HEATR1   | HEAT repeat-containing protein 1                                         | -0.393 | 2.08E-03 | -0.564 | 5.89E-03 |
| FDPS     | Farnesyl pyrophosphate synthetase                                        | -0.378 | 3.23E-02 | -0.337 | 3.38E-02 |
| MBD6     | Methyl-cpg-binding domain protein 6                                      | -0.372 | 1.35E-02 | -0.347 | 9.36E-03 |
| TOMM40L  | Mitochondrial import receptor subunit TOM40B                             | -0.370 | 1.48E-02 | -0.505 | 2.43E-02 |

|         |                                                                |        |          |        |          |
|---------|----------------------------------------------------------------|--------|----------|--------|----------|
| COX7A2L | Cytochrome c oxidase subunit 7A-related protein, mitochondrial | -0.326 | 3.82E-02 | -0.346 | 2.00E-02 |
| ZNF561  | Zinc finger protein 561                                        | -0.319 | 2.99E-02 | -0.297 | 2.97E-02 |
| ZFYVE20 | Rabenosyn-5                                                    | -0.315 | 2.48E-02 | -0.562 | 1.02E-02 |
| PQBP1   | Polyglutamine-binding protein 1                                | -0.282 | 4.57E-02 | -0.556 | 4.49E-03 |



Table S15. Genes with up- or down-regulation of both mRNA expression and histone H3K4me3 modification (uncorrected  $P < 0.05$ ) in chronic alcoholic individuals

| Gene Symbol | Gene Name                                                    | Gene Expression |          | H3K4me3 |          |
|-------------|--------------------------------------------------------------|-----------------|----------|---------|----------|
|             |                                                              | Log FC          | P Value  | Log FC  | P Value  |
| REM1        | GTP-binding protein REM 1                                    | 0.792           | 4.02E-03 | 0.912   | 1.79E-02 |
| PCDHA7      | Protocadherin alpha-7                                        | 0.701           | 3.82E-02 | 0.658   | 2.95E-02 |
| ALG13       | UDP-N-acetylglucosamine transferase subunit ALG13 homolog    | 0.648           | 1.83E-02 | 0.701   | 2.35E-02 |
| TTC21A      | Tetratricopeptide repeat protein 21A                         | 0.478           | 4.04E-03 | 0.191   | 2.38E-02 |
| TCERG1L     | Transcription elongation regulator 1-like protein            | 0.440           | 1.43E-02 | 0.438   | 1.90E-02 |
| FAM105B     | Family with sequence similarity 105, member B                | 0.378           | 4.17E-02 | 0.213   | 3.86E-02 |
| CHMP4B      | Charged multivesicular body protein 4b                       | 0.370           | 2.12E-02 | 0.368   | 7.00E-03 |
| PSMG3       | Proteasome (prosome, macropain) assembly chaperone 3         | 0.366           | 3.40E-02 | 0.405   | 9.08E-03 |
| SNAPC4      | Snrna-activating protein complex subunit 4                   | 0.350           | 3.12E-02 | 0.377   | 1.27E-02 |
| AQP11       | Aquaporin-11                                                 | 0.335           | 3.81E-02 | 0.336   | 1.83E-03 |
| SPATA5L1    | Spermatogenesis-associated protein 5-like protein 1          | 0.333           | 4.62E-02 | 0.242   | 1.20E-02 |
| SEC14L1     | Sec14l1                                                      | 0.327           | 3.41E-02 | 0.276   | 1.83E-02 |
| FMN2        | Formin-2                                                     | 0.327           | 1.81E-02 | 0.223   | 3.75E-02 |
| ABL1        | Proto-oncogene tyrosine-protein kinase ABL1                  | 0.261           | 3.67E-02 | 0.317   | 3.65E-02 |
| CDC40       | Pre-mrna-processing factor 17                                | -1.020          | 4.16E-03 | -0.234  | 2.90E-02 |
| DKK2        | Dickkopf-related protein 2                                   | -0.849          | 3.39E-02 | -0.333  | 3.43E-02 |
| ITSN2       | Intersectin-2                                                | -0.677          | 1.75E-02 | -0.266  | 4.73E-02 |
| CDKL3       | Cyclin-dependent kinase-like 3                               | -0.648          | 2.78E-03 | -0.609  | 4.19E-02 |
| NMD3        | 60S ribosomal export protein NMD3                            | -0.596          | 6.84E-03 | -0.285  | 3.15E-02 |
| SFPQ        | Splicing factor, proline- and glutamine-rich                 | -0.524          | 1.85E-02 | -0.275  | 1.56E-02 |
| CIR         | Potassium inwardly-rectifying channel, subfamily J, member 5 | -0.517          | 2.18E-02 | -0.407  | 3.20E-03 |
| UCHL3       | Ubiquitin carboxyl-terminal hydrolase isozyme L3             | -0.484          | 2.43E-02 | -0.422  | 1.97E-02 |
| GNL3        | Guanine nucleotide-binding protein-like 3                    | -0.476          | 1.37E-02 | -0.485  | 3.95E-03 |
| SLC25A14    | Brain mitochondrial carrier protein 1                        | -0.472          | 1.61E-02 | -0.485  | 2.21E-02 |
| EBAG9       | Receptor-binding cancer antigen expressed on siso cells      | -0.455          | 1.91E-02 | -0.269  | 1.08E-02 |
| CETN3       | Centrin, EF-hand protein, 3                                  | -0.444          | 3.53E-02 | -0.405  | 4.11E-02 |
| TAF10       | Transcription initiation factor TFIID subunit 10             | -0.419          | 4.47E-02 | -0.301  | 4.01E-02 |

|          |                                             |        |          |        |          |
|----------|---------------------------------------------|--------|----------|--------|----------|
| MRPS33   | 28S ribosomal protein S33,<br>mitochondrial | -0.401 | 3.87E-02 | -0.412 | 3.30E-02 |
| SCRN3    | Secernin 3                                  | -0.391 | 1.34E-02 | -0.407 | 3.20E-03 |
| GTPBP10  | GTP-binding protein 10                      | -0.386 | 2.96E-02 | -0.528 | 1.38E-02 |
| ZNF10    | Zinc finger protein 10                      | -0.352 | 2.80E-02 | -0.327 | 1.60E-02 |
| USP37    | Ubiquitin carboxyl-terminal hydrolase<br>37 | -0.326 | 3.90E-02 | -0.332 | 1.99E-02 |
| C9orf119 | chromosome 9 open reading frame<br>119      | -0.323 | 4.09E-02 | -0.373 | 3.02E-02 |
| MED7     | Mediator complex subunit 7                  | -0.320 | 3.08E-02 | -0.328 | 4.75E-02 |
| PI4KB    | Phosphatidylinositol 4-kinase beta          | -0.256 | 4.71E-02 | -0.357 | 3.85E-03 |

## Supplementary Materials and Methods:

### *Subjects:*

Postmortem brain tissue was provided by the University of Miami Brain Bank. Subjects include nine chronic cocaine addicts and eight alcoholics. Specimens were obtained during routine autopsy from chronic cocaine and alcohol abusers and age-matched drug- and alcohol-free control subjects (Table S1). Medicolegal investigations of the cause and manner of deaths were conducted by forensic pathologists (1, 2). The circumstances of death and toxicology data were reviewed carefully before classifying a cocaine intoxication case. The cocaine intoxication cases were evaluated for common drugs of abuse and alcohol and positive urine screens were confirmed by quantitative analysis of cocaine and benzoylecgonine in blood and brain. All subjects in the cocaine or alcohol groups met DSM-IV criteria for either abuse or dependence. Retrospective review demonstrated a regular pattern of current cocaine or alcohol use, including binge and/or daily use for years prior to death. None of the case histories revealed confirmation of neuropsychiatric disorders from all available sources of information, including medical examiner reports, next-of-kin informants, and medical and/or legal records. Drug-free age-matched nine control subjects were selected from accidental or cardiac sudden deaths with negative urine screens for all common drugs and there was no reported history of licit or illicit drug use prior to death. All subjects died suddenly without a prolonged agonal state. Brain pH measures were done as quality control for each case with values > 6.0. Due to the availability of high-quality RNA and immuno-precipitation enriched chromatin DNA, RNA-seq analysis included eight cocaine, eight alcoholic, and eight control individuals, and ChIP-seq analysis included eight cocaine, eight alcoholic, and nine controls. The research protocols for this study were approved by the University of Miami.

### *Construction of double-stranded cDNA library:*

100 mg tissue of postmortem brain hippocampus (dentate gyrus and CA1 to CA4) was used for total RNA extraction. Tissue samples were submerged in Guanidinium thiocyanate and phenol-based RNA extraction solution STAT-60 (Friendswood, TX) and homogenized using a glass-Teflon homogenizer. Following mixing with chloroform and centrifugation, the aqueous phase of the solution was collected and isopropanol was added. RNA was purified on RNeasy spin columns (Qiagen, Valencia, CA). To eliminate residual genomic DNA contamination, RNA samples were incubated with DNase I (Qiagen) on column at room temperature for 15 min and washed several times before collection in elution buffer.

To isolate mRNA, 35 µg of total RNA was heated at 65 C for 2 min, and then mixed with 0.5 mg of Dynabeads oligo (dT)<sub>25</sub> magnetic beads (Invitrogen) in the binding buffer (20 mM Tris-HCl, pH 7.5, 1.0 M LiCl, 2 mM EDTA). After incubation at room temperature for 5 min and several washes several times, mRNA was eluted from the beads by heating at 80 C for 2 min. The purified mRNA was fragmented to 150 – 500 base pair range by being mixed with 10 x fragmentation buffer (Ambion, Austin, TX) and heating at 70 C for 3 min. mRNA was then purified with RNeasy spin columns.

Two-hundred ng of fragmented mRNA was reverse transcribed to first strand cDNAs by random priming, using 3 µg of the random hexamer oligos and 200 units of Superscript II reverse transcriptase (Invitrogen). The reaction was carried out at 45 C for 1 hr in the presence of the

First Strand Buffer (Invitrogen), 10 mM DTT, and 0.5 mM dNTP mix. For second strand cDNA synthesis, 400 units of *E. Coli* DNA polymerase, 2 units of *E. Coli* RNase H, and 10 units of *E. Coli* DNA ligase were added, and reaction was carried out at 16 C for 2 hrs in the presence of Second Strand Buffer and 0.2 mM dNTP mix. 20 units of T4 DNA polymerase was added at the end of incubation for end repair. Synthesized double-stranded cDNA library were purified with QIAquick purification kits (Qiagen).

*Chromatin Immunoprecipitation (ChIP):*

Postmortem hippocampal tissue samples (50 mg) were cut into slices less than 1 mm in thickness, and fixed in 3 ml of 1% formaldehyde/PBS solution for 10 min at room temperature to cross-link chromatin DNA and proteins. After being washed with PBS, the tissue samples were homogenized in a glass-Teflon homogenizer. Following homogenization, chromatin was isolated using the Magna ChIP G kit (Millipore, Temecula, CA) according to the Millipore protocol. Briefly, cells were lysed in Cell Lysis Buffer in the presence of protease inhibitor cocktail. Nuclei were isolated from the lysed cells by centrifugation, and resuspended in Nuclear Lysis Buffer. The chromatin DNA was then fragmented into 150 – 500 base-pair range by sonication using a Branson Sonifer (Danbury, Connecticut).

To immuno-precipitate specific genomic regions of chromatin DNA, the isolated chromatin fragments were incubated with antibodies against histone H3 trimethylated at Lysine 4 (H3K4me3, Abcam, Cambridge, MA) and magnetic protein G beads (Millipore) at 4 C for 2.5 hr. Following incubation, the beads were washed with low salt, high salt, LiCl salt, and TE buffers, and chromatin fragments were reverse cross-linked by proteinase K digestion at 62 C for 2 hr. The eluted DNA was purified after reverse cross-linking by column purification. The H3k4me3-specific enrichment was validated by PCR amplification of select positive and negative genomic regions and amplification signals were normalized to the input DNA samples which were extracted from the same pools of chromatin fragments without enrichment by immuno-precipitation.

*High-throughput, massively parallel sequencing using an Illumina Genome Analyzer (GAIIx):*

Sample preparation and sequencing on the Genome Analyzer (Illumina, San Diego, CA) were carried out according to the Illumina protocols with some modifications. Briefly, the double-stranded cDNA and ChIP-enriched genomic DNA were treated with T4 DNA polymerase and the Klenow fragment for end repair. The 5' end of the DNA fragments were then phosphorylated by T4 polynucleotide kinase, and an adenosine base was added to the 3' end of the fragments by Klenow (3'-5' exo<sup>-</sup>). A universal adaptor was then added to both ends of the DNA fragments by A-T ligation. Following 18 cycles of PCR with the Phusion DNA polymerase, the DNA library was then be purified on a 2% agarose gel, and fragments of 170 – 300 base-pair in size were recovered. Around 15 ng of the DNA library was then used for cluster generation on a grafted GAII Flow Cell, and

then sequenced on the Genome Analyzer for 36 cycles using the “Sequencing-by-synthesis” method.

*Sequence base-calling, mapping to genome, data normalization and statistical analysis:*

Sequences were called from image files with the Illumina Genome Analyzer Pipeline (GAPipeline) and aligned to the reference genome (UCSC hg18) using Extended Eland in the GAPipeline. A total of 3,181,000 uniquely mapped RNA-seq reads and 3,269,000 uniquely mapped H3K4-me3 reads for each sample were retrieved from export.txt files (output of Extended Eland). Based on their mapping locations, these selected reads were parsed with in-house Perl scripts to generate base coverage in WIG file format. After moving average smoothing, the chromosome locations of enrichment peaks were identified from pooled WIG files using in-house Perl scripts. For peak identification from the pooled WIG files, the minimum of height, width and border distance between two peaks (two peaks were merged if they were within this distance) were 5, 30 bp and 50 bp respectively for RNA-seq and 15, 80bp, and 1000 bp respectively for H3K4-me3 ChIPseq. On average, 68% of RNA-seq reads and 21% of H3K4-me3 ChIPseq reads fell into the peaks. For RNA-seq data, the numbers of sequencing reads of the most abundantly covered 50 base pairs (bp) of the highest peak in an annotated RefSeq gene were counted for each sample. For histone H3K4me3 ChIP-seq data, the numbers of reads in the area under the curve of each individual peak were counted for each sample. The read counts were then log<sub>2</sub> transformed and normalized using quantile normalization. The group comparisons between the drug-free individuals and the cocaine addicted or alcoholic individuals were performed using *t*-tests, FDR *q* value was calculated for each P value using the Benjamini-Hochberg method. For gene ontology and functional annotation analysis, lists of subsets of the genes that were significantly different in expression (FDR < 0.2) between the control and the cocaine, addicted, or alcohol group were analyzed with the Functional Annotation Tool of the DAVID Bioinformatics Resources 6.7, National Institute of Allergy and Infectious Diseases (NIAID), NIH (<http://david.abcc.ncifcrf.gov/>).

*Quantitative RT-PCR:*

mRNA (50 ng) was primed with 150 ng of random hexamer (Invitrogen) and reverse transcribed into first strand cDNA with Superscript RT II (Invitrogen) in the presence of the First Strand Buffer, 10 mM DTT, and 0.5 mM dNTPs at 45 C for 1 hr in a 20 µl reaction volume. For quantitative PCR, 0.5 µl of cDNA was mixed with gene-specific primers (0.25 µM final concentration), 2x SYBR Green master mix (Applied Biosystems) in a 10 µl volume. Reactions were carried out on the ABI 7900 real-time PCR system. Relative gene expression level for each sample was calculated using the  $\Delta$ CT value (normalized detection threshold).

*References:*

1. Stephens BG, Jentzen JM, Karch S, Mash DC, Wetli CV (2004) Criteria for the interpretation of cocaine levels in human biological samples and their relation to the cause of death. *Am J Forensic Med Pathol* 25:1-10.
2. Stephens BG, Jentzen JM, Karch S, Wetli CV, Mash DC (2004) National Association of Medical Examiners position paper on the certification of cocaine-related deaths. *Am J Forensic Med Pathol* 25:11-13.
